# Supplementary material for: Integrative Pharmacogenomics Analysis of Patient-Derived Xenografts
Source: Oxford University Press journal article supplement (doi:10.1158/0008-5472.can-19-0349), 2019-05-29
Supplement: 00085472can190349-sup-216275_3_supp_5522716_prvv63.xlsx [file 00085472can190349-sup-216275_3_supp_5522716_prvv63.xlsx]

## Sheet: pathwayVs.passage
Name	p.value	fdr	dir	Genes.tot	Stat.dist.dir	Genes.up	Genes.down
REACTOME_METABOLISM_OF_LIPIDS_AND_LIPOPROTEINS	9.9999e-06	0.00134948	up	438	0.28239	438	0
REACTOME_CELL_CELL_COMMUNICATION	9.9999e-06	0.00134948	up	111	0.39798	111	0
REACTOME_BIOLOGICAL_OXIDATIONS	1e-05	0.00134948	up	110	0.39118	110	0
REACTOME_CELL_JUNCTION_ORGANIZATION	1.0002e-05	0.00134948	up	72	0.44101	72	0
REACTOME_COLLAGEN_FORMATION	1.0011e-05	0.00134948	up	56	0.47644	56	0
REACTOME_EXTRACELLULAR_MATRIX_ORGANIZATION	4.0004e-05	0.00449378	up	82	0.39981	82	0
REACTOME_CELL_CELL_JUNCTION_ORGANIZATION	7.011e-05	0.00675059	up	53	0.43976	53	0
REACTOME_O_LINKED_GLYCOSYLATION_OF_MUCINS	9.0179e-05	0.00759758	up	51	0.44358	51	0
REACTOME_HEMOSTASIS	0.00015	0.0112333	up	409	0.26415	408	1
REACTOME_PLATELET_ACTIVATION_SIGNALING_AND_AGGREGATION	0.00017	0.011458	up	184	0.30822	184	0
REACTOME_ADHERENS_JUNCTIONS_INTERACTIONS	0.00020413	0.0125076	up	27	0.51791	27	0
REACTOME_INTEGRIN_CELL_SURFACE_INTERACTIONS	0.00027004	0.0149243	up	75	0.37982	75	0
REACTOME_RESPONSE_TO_ELEVATED_PLATELET_CYTOSOLIC_CA2_	0.00029005	0.0149243	up	76	0.37365	76	0
REACTOME_PHOSPHOLIPID_METABOLISM	0.00031	0.0149243	up	180	0.30124	180	0
REACTOME_PHASE1_FUNCTIONALIZATION_OF_COMPOUNDS	0.00036025	0.0161872	up	62	0.39052	62	0
REACTOME_REGULATION_OF_GENE_EXPRESSION_IN_BETA_CELLS	0.00046649	0.0196509	up	17	0.57435	17	0
REACTOME_GLYCOSAMINOGLYCAN_METABOLISM	0.00071001	0.0275936	up	102	0.3423	102	0
REACTOME_MRNA_3_END_PROCESSING	0.00073692	0.0275936	dn	31	-0.38597	31	0
REACTOME_TRIGLYCERIDE_BIOSYNTHESIS	0.00083814	0.0297319	up	34	0.45474	34	0
REACTOME_ETHANOL_OXIDATION	0.0011605	0.0391089	up	10	0.66185	10	0
REACTOME_SPHINGOLIPID_METABOLISM	0.0015713	0.0504312	up	60	0.3763	60	0
REACTOME_ELONGATION_ARREST_AND_RECOVERY	0.0017841	0.0509713	dn	26	-0.33399	26	0
REACTOME_METABOLISM_OF_PROTEINS	0.0018	0.0509713	up	352	0.25433	352	0
REACTOME_METABOLISM_OF_VITAMINS_AND_COFACTORS	0.001815	0.0509713	up	47	0.39955	47	0
REACTOME_TRANSMEMBRANE_TRANSPORT_OF_SMALL_MOLECULES	0.00211	0.0546689	up	386	0.2498	385	1
REACTOME_PHASE_II_CONJUGATION	0.0021351	0.0546689	up	49	0.39115	49	0
REACTOME_FATTY_ACID_TRIACYLGLYCEROL_AND_KETONE_BODY_METABOLISM	0.00219	0.0546689	up	159	0.29273	159	0
REACTOME_GLYCEROPHOSPHOLIPID_BIOSYNTHESIS	0.0023502	0.0563167	up	79	0.34311	79	0
REACTOME_GLUTATHIONE_CONJUGATION	0.0025452	0.0563167	up	19	0.51277	19	0
REACTOME_PEROXISOMAL_LIPID_METABOLISM	0.0025464	0.0563167	up	20	0.51026	20	0
REACTOME_ADP_SIGNALLING_THROUGH_P2RY1	0.0025911	0.0563167	up	24	0.47978	24	0
REACTOME_ABC_FAMILY_PROTEINS_MEDIATED_TRANSPORT	0.0027415	0.0563167	up	30	0.44698	30	0
REACTOME_MRNA_SPLICING_MINOR_PATHWAY	0.0028409	0.0563167	dn	38	-0.29444	38	0
REACTOME_CLEAVAGE_OF_GROWING_TRANSCRIPT_IN_THE_TERMINATION_REGION_	0.0028409	0.0563167	dn	38	-0.32737	38	0
REACTOME_METABOLISM_OF_NUCLEOTIDES	0.0031821	0.0589324	up	64	0.3563	64	0
REACTOME_CHONDROITIN_SULFATE_DERMATAN_SULFATE_METABOLISM	0.0032199	0.0589324	up	46	0.38868	46	0
REACTOME_BILE_ACID_AND_BILE_SALT_METABOLISM	0.0033116	0.0589324	up	25	0.46508	25	0
REACTOME_CELL_EXTRACELLULAR_MATRIX_INTERACTIONS	0.0033226	0.0589324	up	12	0.58573	12	0
REACTOME_AMINO_ACID_AND_OLIGOPEPTIDE_SLC_TRANSPORTERS	0.0034294	0.0592671	up	47	0.38664	47	0
REACTOME_AMINO_ACID_TRANSPORT_ACROSS_THE_PLASMA_MEMBRANE	0.003733	0.0629011	up	29	0.44215	29	0
REACTOME_FORMATION_OF_FIBRIN_CLOT_CLOTTING_CASCADE	0.0040412	0.0664334	up	30	0.43798	30	0
REACTOME_METABOLISM_OF_CARBOHYDRATES	0.00473	0.0759052	up	215	0.26811	215	0
REACTOME_APOPTOTIC_CLEAVAGE_OF_CELL_ADHESION_PROTEINS	0.0052335	0.0795173	up	10	0.60756	10	0
REACTOME_CHONDROITIN_SULFATE_BIOSYNTHESIS	0.005237	0.0795173	up	19	0.49272	19	0
REACTOME_CELL_SURFACE_INTERACTIONS_AT_THE_VASCULAR_WALL	0.0053404	0.0795173	up	79	0.32992	79	0
REACTOME_P2Y_RECEPTORS	0.005427	0.0795173	up	12	0.56984	12	0
REACTOME_ALPHA_LINOLENIC_ACID_ALA_METABOLISM	0.0057084	0.0818609	up	11	0.58772	11	0
REACTOME_PURINE_METABOLISM	0.0065994	0.0926666	up	31	0.42017	31	0
REACTOME_METABOLISM_OF_AMINO_ACIDS_AND_DERIVATIVES	0.0069899	0.0961468	up	168	0.27772	168	0
REACTOME_SPHINGOLIPID_DE_NOVO_BIOSYNTHESIS	0.0076186	0.101434	up	29	0.42545	29	0
REACTOME_PURINE_CATABOLISM	0.0076753	0.101434	up	8	0.63835	8	0
REACTOME_OLFACTORY_SIGNALING_PATHWAY	0.007874	0.102059	dn	55	-0.28607	54	1
REACTOME_GPVI_MEDIATED_ACTIVATION_CASCADE	0.0082821	0.104552	up	28	0.42634	28	0
REACTOME_SYNTHESIS_OF_BILE_ACIDS_AND_BILE_SALTS	0.0083766	0.104552	up	18	0.48784	18	0
REACTOME_GAP_JUNCTION_ASSEMBLY	0.0091903	0.112623	up	15	0.51152	15	0
REACTOME_A_TETRASACCHARIDE_LINKER_SEQUENCE_IS_REQUIRED_FOR_GAG_SYNTHESIS	0.010037	0.120802	up	25	0.43453	25	0
REACTOME_NUCLEOTIDE_LIKE_PURINERGIC_RECEPTORS	0.010448	0.123543	up	15	0.5078	15	0
REACTOME_IMMUNE_SYSTEM	0.01216	0.140283	up	778	0.21803	776	2
REACTOME_POST_TRANSLATIONAL_PROTEIN_MODIFICATION	0.01228	0.140283	up	169	0.26991	169	0
REACTOME_THROMBOXANE_SIGNALLING_THROUGH_TP_RECEPTOR	0.013277	0.14856	up	22	0.44298	22	0
REACTOME_CHOLESTEROL_BIOSYNTHESIS	0.013627	0.14856	up	19	0.4621	19	0
REACTOME_APOPTOTIC_CLEAVAGE_OF_CELLULAR_PROTEINS	0.013895	0.14856	up	34	0.38908	34	0
REACTOME_DEVELOPMENTAL_BIOLOGY	0.01407	0.14856	up	363	0.23718	363	0
REACTOME_SLC_MEDIATED_TRANSMEMBRANE_TRANSPORT	0.01413	0.14856	up	226	0.25529	226	0
REACTOME_TRANSPORT_OF_VITAMINS_NUCLEOSIDES_AND_RELATED_MOLECULES	0.014327	0.14856	up	30	0.40266	30	0
REACTOME_PLATELET_ADHESION_TO_EXPOSED_COLLAGEN	0.014768	0.150813	up	10	0.56675	10	0
REACTOME_AXON_GUIDANCE	0.01594	0.160352	up	232	0.25288	232	0
REACTOME_FORMATION_OF_RNA_POL_II_ELONGATION_COMPLEX_	0.016444	0.162989	dn	34	-0.24926	34	0
REACTOME_GAP_JUNCTION_TRAFFICKING	0.017577	0.171694	up	23	0.42856	23	0
REACTOME_SYNTHESIS_OF_PA	0.018034	0.173642	up	26	0.41359	26	0
REACTOME_SIGNAL_AMPLIFICATION	0.018327	0.173977	up	30	0.395	30	0
REACTOME_REGULATION_OF_BETA_CELL_DEVELOPMENT	0.018896	0.175166	up	25	0.41466	25	0
REACTOME_ACTIVATED_AMPK_STIMULATES_FATTY_ACID_OXIDATION_IN_MUSCLE	0.018972	0.175166	up	15	0.48556	15	0
REACTOME_KERATAN_SULFATE_KERATIN_METABOLISM	0.019468	0.177317	up	28	0.40141	28	0
REACTOME_KERATAN_SULFATE_BIOSYNTHESIS	0.020177	0.181324	up	25	0.41233	25	0
REACTOME_TRANSPORT_OF_INORGANIC_CATIONS_ANIONS_AND_AMINO_ACIDS_OLIGOPEPTIDES	0.02045	0.181359	up	87	0.30045	87	0
REACTOME_SYNTHESIS_OF_PC	0.020812	0.18198	up	17	0.46417	17	0
REACTOME_TRANSPORT_OF_MATURE_TRANSCRIPT_TO_CYTOPLASM	0.021097	0.18198	dn	48	-0.22962	48	0
REACTOME_DIABETES_PATHWAYS	0.02133	0.18198	up	116	0.28229	116	0
REACTOME_REGULATION_OF_COMPLEMENT_CASCADE	0.021685	0.182696	up	10	0.54875	10	0
REACTOME_NCAM1_INTERACTIONS	0.021975	0.182854	up	39	0.3623	39	0
REACTOME_TERMINATION_OF_O_GLYCAN_BIOSYNTHESIS	0.022521	0.185112	up	20	0.43879	20	0
REACTOME_REGULATORY_RNA_PATHWAYS	0.023434	0.190295	dn	20	-0.31575	20	0
REACTOME_APOPTOTIC_EXECUTION_PHASE	0.023825	0.191167	up	47	0.34397	47	0
REACTOME_UNBLOCKING_OF_NMDA_RECEPTOR_GLUTAMATE_BINDING_AND_ACTIVATION	0.024995	0.198196	up	14	0.48433	14	0
REACTOME_TRNA_AMINOACYLATION	0.026582	0.208329	up	40	0.35583	40	0
REACTOME_G2_M_DNA_DAMAGE_CHECKPOINT	0.028411	0.21626	dn	8	-0.49509	8	0
REACTOME_L1CAM_INTERACTIONS	0.028475	0.21626	up	78	0.30143	78	0
REACTOME_FACILITATIVE_NA_INDEPENDENT_GLUCOSE_TRANSPORTERS	0.028932	0.21626	up	10	0.53419	10	0
REACTOME_ADAPTIVE_IMMUNE_SYSTEM	0.02923	0.21626	up	453	0.22466	453	0
REACTOME_VIRAL_MESSENGER_RNA_SYNTHESIS	0.029601	0.21626	dn	13	-0.38737	13	0
REACTOME_FGFR_LIGAND_BINDING_AND_ACTIVATION	0.029671	0.21626	up	22	0.41583	22	0
REACTOME_SYNTHESIS_OF_BILE_ACIDS_AND_BILE_SALTS_VIA_7ALPHA_HYDROXYCHOLESTEROL	0.02984	0.21626	up	14	0.47638	14	0
REACTOME_AMINO_ACID_SYNTHESIS_AND_INTERCONVERSION_TRANSAMINATION	0.030999	0.222269	up	16	0.45643	16	0
REACTOME_COMMON_PATHWAY	0.031899	0.226315	up	13	0.4858	13	0
REACTOME_REGULATION_OF_INSULIN_SECRETION	0.033271	0.23359	up	83	0.294	83	0
REACTOME_CYTOSOLIC_TRNA_AMINOACYLATION	0.033658	0.233871	up	23	0.40581	23	0
REACTOME_TCA_CYCLE_AND_RESPIRATORY_ELECTRON_TRANSPORT	0.034161	0.234944	up	96	0.28498	96	0
REACTOME_TIGHT_JUNCTION_INTERACTIONS	0.035383	0.240051	up	26	0.39132	26	0
REACTOME_RESPIRATORY_ELECTRON_TRANSPORT_ATP_SYNTHESIS_BY_CHEMIOSMOTIC_COUPLING_AND_HEAT_PRODUCTION_BY_UNCOUPLING_PROTEINS_	0.035758	0.240051	up	63	0.31074	63	0
REACTOME_PROSTACYCLIN_SIGNALLING_THROUGH_PROSTACYCLIN_RECEPTOR	0.035972	0.240051	up	18	0.43381	18	0
REACTOME_MEMBRANE_TRAFFICKING	0.03673	0.242706	up	112	0.27459	112	0
REACTOME_CGMP_EFFECTS	0.037351	0.244413	up	17	0.44028	17	0
REACTOME_TRANSPORT_OF_GLUCOSE_AND_OTHER_SUGARS_BILE_SALTS_AND_ORGANIC_ACIDS_METAL_IONS_AND_AMINE_COMPOUNDS	0.038801	0.250275	up	83	0.29092	83	0
REACTOME_G_ALPHA_Z_SIGNALLING_EVENTS	0.039754	0.250275	up	42	0.34071	42	0
REACTOME_ADP_SIGNALLING_THROUGH_P2RY12	0.040033	0.250275	up	20	0.41685	20	0
REACTOME_GLUTAMATE_NEUROTRANSMITTER_RELEASE_CYCLE	0.04018	0.250275	up	14	0.46341	14	0
REACTOME_BASIGIN_INTERACTIONS	0.040286	0.250275	up	22	0.40496	22	0
REACTOME_PROCESSING_OF_INTRONLESS_PRE_MRNAS	0.040687	0.250275	dn	14	-0.35145	14	0
REACTOME_SYNTHESIS_SECRETION_AND_DEACYLATION_OF_GHRELIN	0.040846	0.250275	up	12	0.48619	12	0
REACTOME_PROCESSING_OF_CAPPED_INTRONLESS_PRE_MRNA	0.042015	0.255118	dn	21	-0.29121	21	0
REACTOME_SIGNALING_BY_NOTCH2	0.042578	0.25562	up	11	0.49895	11	0
REACTOME_ABORTIVE_ELONGATION_OF_HIV1_TRANSCRIPT_IN_THE_ABSENCE_OF_TAT	0.04318	0.25562	dn	18	-0.31465	18	0
REACTOME_PURINE_SALVAGE	0.043649	0.25562	up	13	0.47033	13	0
REACTOME_SYNTHESIS_AND_INTERCONVERSION_OF_NUCLEOTIDE_DI_AND_TRIPHOSPHATES	0.043888	0.25562	up	15	0.45053	15	0
REACTOME_DNA_STRAND_ELONGATION	0.043994	0.25562	dn	27	-0.2625	27	0
REACTOME_CYTOKINE_SIGNALING_IN_IMMUNE_SYSTEM	0.04569	0.263206	up	238	0.23902	237	1
REACTOME_CD28_DEPENDENT_VAV1_PATHWAY	0.046596	0.26615	up	11	0.4943	11	0
REACTOME_SIGNALING_BY_THE_B_CELL_RECEPTOR_BCR	0.04806	0.269802	up	107	0.2725	107	0
REACTOME_RNA_POL_II_PRE_TRANSCRIPTION_EVENTS	0.048458	0.269802	dn	50	-0.20664	50	0
REACTOME_SMAD2_SMAD3_SMAD4_HETEROTRIMER_REGULATES_TRANSCRIPTION	0.049611	0.269802	up	24	0.38656	24	0
REACTOME_ENDOSOMAL_SORTING_COMPLEX_REQUIRED_FOR_TRANSPORT_ESCRT	0.050053	0.269802	up	25	0.3816	25	0
REACTOME_NITRIC_OXIDE_STIMULATES_GUANYLATE_CYCLASE	0.050152	0.269802	up	23	0.39112	23	0
REACTOME_GLYCOSPHINGOLIPID_METABOLISM	0.05016	0.269802	up	31	0.36018	31	0
REACTOME_INTERFERON_GAMMA_SIGNALING	0.05031	0.269802	up	51	0.31781	51	0
REACTOME_SYNTHESIS_OF_VERY_LONG_CHAIN_FATTY_ACYL_COAS	0.050604	0.269802	up	12	0.4752	12	0
REACTOME_P75_NTR_RECEPTOR_MEDIATED_SIGNALLING	0.050838	0.269802	up	75	0.29143	75	0
REACTOME_G_BETA_GAMMA_SIGNALLING_THROUGH_PI3KGAMMA	0.051379	0.27018	up	23	0.39034	23	0
REACTOME_SYNTHESIS_SECRETION_AND_INACTIVATION_OF_GIP	0.051711	0.27018	up	12	0.474	12	0
REACTOME_NEUROTRANSMITTER_RELEASE_CYCLE	0.053205	0.275847	up	32	0.3547	32	0
REACTOME_SYNTHESIS_SECRETION_AND_INACTIVATION_OF_GLP1	0.054824	0.280384	up	16	0.43177	16	0
REACTOME_MITOTIC_PROMETAPHASE	0.055556	0.280384	dn	78	-0.22647	78	0
REACTOME_GLUCONEOGENESIS	0.055713	0.280384	up	28	0.36694	28	0
REACTOME_THROMBIN_SIGNALLING_THROUGH_PROTEINASE_ACTIVATED_RECEPTORS_PARS	0.055744	0.280384	up	30	0.3602	30	0
REACTOME_REGULATION_OF_INSULIN_SECRETION_BY_ACETYLCHOLINE	0.057258	0.285866	up	9	0.51515	9	0
REACTOME_PPARA_ACTIVATES_GENE_EXPRESSION	0.059039	0.290378	up	100	0.27235	100	0
REACTOME_TRAFFICKING_AND_PROCESSING_OF_ENDOSOMAL_TLR	0.059173	0.290378	up	10	0.49796	10	0
REACTOME_INTEGRATION_OF_ENERGY_METABOLISM	0.059519	0.290378	up	108	0.26792	108	0
REACTOME_FGFR4_LIGAND_BINDING_AND_ACTIVATION	0.059885	0.290378	up	12	0.46663	12	0
REACTOME_THE_NLRP3_INFLAMMASOME	0.060879	0.291025	up	10	0.4962	10	0
REACTOME_MITOCHONDRIAL_FATTY_ACID_BETA_OXIDATION	0.060882	0.291025	up	14	0.44399	14	0
REACTOME_SIGNALING_BY_RHO_GTPASES	0.061359	0.291239	up	103	0.26953	103	0
REACTOME_NETRIN1_SIGNALING	0.064714	0.305016	up	38	0.3334	38	0
REACTOME_SIGNALING_BY_ERBB4	0.066172	0.30852	up	83	0.27917	83	0
REACTOME_MICRORNA_MIRNA_BIOGENESIS	0.066373	0.30852	dn	17	-0.30433	17	0
REACTOME_MITOCHONDRIAL_PROTEIN_IMPORT	0.067496	0.311591	up	42	0.32439	42	0
REACTOME_HEPARAN_SULFATE_HEPARIN_HS_GAG_METABOLISM	0.06966	0.319393	up	47	0.31437	47	0
REACTOME_FORMATION_OF_THE_HIV1_EARLY_ELONGATION_COMPLEX	0.076503	0.343105	dn	24	-0.25155	24	0
REACTOME_ANTIGEN_PROCESSING_CROSS_PRESENTATION	0.077375	0.343105	up	57	0.29825	57	0
REACTOME_MRNA_CAPPING	0.077596	0.343105	dn	24	-0.2512	24	0
REACTOME_FGFR2C_LIGAND_BINDING_AND_ACTIVATION	0.078204	0.343105	up	12	0.45215	12	0
REACTOME_SIGNALING_BY_HIPPO	0.078407	0.343105	up	20	0.38838	20	0
REACTOME_GLUCOSE_METABOLISM	0.078522	0.343105	up	58	0.29656	58	0
REACTOME_OTHER_SEMAPHORIN_INTERACTIONS	0.078723	0.343105	up	13	0.44113	13	0
REACTOME_SIGNAL_TRANSDUCTION_BY_L1	0.078922	0.343105	up	29	0.35051	29	0
REACTOME_ACYL_CHAIN_REMODELLING_OF_PC	0.079413	0.343105	up	22	0.37684	22	0
REACTOME_DOWNSTREAM_SIGNALING_EVENTS_OF_B_CELL_RECEPTOR_BCR	0.080228	0.344418	up	80	0.27654	80	0
REACTOME_SIGNALING_BY_FGFR3_MUTANTS	0.081205	0.346406	up	11	0.46319	11	0
REACTOME_LIPOPROTEIN_METABOLISM	0.082946	0.348253	up	27	0.35519	27	0
REACTOME_INSULIN_SYNTHESIS_AND_PROCESSING	0.083071	0.348253	up	18	0.39748	18	0
REACTOME_GLUCURONIDATION	0.083188	0.348253	up	6	0.56526	6	0
REACTOME_NONSENSE_MEDIATED_DECAY_ENHANCED_BY_THE_EXON_JUNCTION_COMPLEX	0.084507	0.351591	dn	62	-0.1791	62	0
REACTOME_SIGNALING_BY_PDGF	0.08635	0.356593	up	115	0.25763	115	0
REACTOME_RESPIRATORY_ELECTRON_TRANSPORT	0.087067	0.356593	up	49	0.30513	49	0
REACTOME_CD28_CO_STIMULATION	0.087728	0.356593	up	30	0.34333	30	0
REACTOME_SEMA3A_PLEXIN_REPULSION_SIGNALING_BY_INHIBITING_INTEGRIN_ADHESION	0.088053	0.356593	up	13	0.43485	13	0
REACTOME_G_ALPHA_Q_SIGNALLING_EVENTS	0.088999	0.356593	up	163	0.24287	163	0
REACTOME_CHYLOMICRON_MEDIATED_LIPID_TRANSPORT	0.089162	0.356593	up	15	0.41596	15	0
REACTOME_ACTIVATION_OF_NMDA_RECEPTOR_UPON_GLUTAMATE_BINDING_AND_POSTSYNAPTIC_EVENTS	0.089537	0.356593	up	35	0.32857	35	0
REACTOME_PURINE_RIBONUCLEOSIDE_MONOPHOSPHATE_BIOSYNTHESIS	0.090696	0.356593	up	11	0.45649	11	0
REACTOME_EFFECTS_OF_PIP2_HYDROLYSIS	0.090805	0.356593	up	22	0.37105	22	0
REACTOME_INFLAMMASOMES	0.091	0.356593	up	15	0.41485	15	0
REACTOME_TRANSCRIPTION_COUPLED_NER_TC_NER	0.09291	0.361973	dn	36	-0.21438	36	0
REACTOME_TRANSMISSION_ACROSS_CHEMICAL_SYNAPSES	0.093759	0.362126	up	175	0.23954	175	0
REACTOME_CYTOCHROME_P450_ARRANGED_BY_SUBSTRATE_TYPE	0.094427	0.362126	up	43	0.31182	43	0
REACTOME_S_PHASE	0.094561	0.362126	up	91	0.26639	91	0
REACTOME_GOLGI_ASSOCIATED_VESICLE_BIOGENESIS	0.095913	0.363373	up	43	0.31128	43	0
REACTOME_ASPARAGINE_N_LINKED_GLYCOSYLATION	0.095965	0.363373	up	76	0.27528	76	0
REACTOME_CYCLIN_E_ASSOCIATED_EVENTS_DURING_G1_S_TRANSITION_	0.096517	0.363422	up	50	0.30047	50	0
REACTOME_METABOLISM_OF_PORPHYRINS	0.097323	0.364421	up	14	0.41957	14	0
REACTOME_SEMAPHORIN_INTERACTIONS	0.099088	0.36898	up	62	0.28613	62	0
REACTOME_APOPTOSIS	0.10116	0.374625	up	124	0.25111	124	0
REACTOME_CLASS_I_MHC_MEDIATED_ANTIGEN_PROCESSING_PRESENTATION	0.10322	0.380165	up	210	0.23163	210	0
REACTOME_INCRETIN_SYNTHESIS_SECRETION_AND_INACTIVATION	0.10553	0.386561	up	19	0.37954	19	0
REACTOME_SIGNALING_BY_INSULIN_RECEPTOR	0.1082	0.391913	up	95	0.26112	95	0
REACTOME_INSULIN_RECEPTOR_SIGNALLING_CASCADE	0.1088	0.391913	up	76	0.27195	76	0
REACTOME_G_PROTEIN_ACTIVATION	0.10962	0.391913	up	26	0.34634	26	0
REACTOME_PLATELET_HOMEOSTASIS	0.10994	0.391913	up	71	0.27556	71	0
REACTOME_SIGNALLING_BY_NGF	0.11018	0.391913	up	200	0.23237	200	0
REACTOME_P53_DEPENDENT_G1_DNA_DAMAGE_RESPONSE	0.11048	0.391913	up	43	0.30639	43	0
REACTOME_SIGNALING_BY_ROBO_RECEPTOR	0.11245	0.393426	up	27	0.34219	27	0
REACTOME_INHIBITION_OF_INSULIN_SECRETION_BY_ADRENALINE_NORADRENALINE	0.11276	0.393426	up	24	0.35249	24	0
REACTOME_G_BETA_GAMMA_SIGNALLING_THROUGH_PLC_BETA	0.11341	0.393426	up	19	0.3757	19	0
REACTOME_AMINE_COMPOUND_SLC_TRANSPORTERS	0.11342	0.393426	up	26	0.34497	26	0
REACTOME_FATTY_ACYL_COA_BIOSYNTHESIS	0.11482	0.393426	up	15	0.40208	15	0
REACTOME_TRANSPORT_TO_THE_GOLGI_AND_SUBSEQUENT_MODIFICATION	0.11575	0.393426	up	32	0.32582	32	0
REACTOME_REGULATION_OF_ORNITHINE_DECARBOXYLASE_ODC	0.11585	0.393426	up	37	0.31509	37	0
REACTOME_SIGNALING_BY_NOTCH4	0.1161	0.393426	up	11	0.44142	11	0
REACTOME_PASSIVE_TRANSPORT_BY_AQUAPORINS	0.11616	0.393426	up	10	0.45593	10	0
REACTOME_CYTOSOLIC_SULFONATION_OF_SMALL_MOLECULES	0.11822	0.397226	up	12	0.42814	12	0
REACTOME_ABACAVIR_TRANSPORT_AND_METABOLISM	0.11862	0.397226	up	10	0.4543	10	0
REACTOME_SCFSKP2_MEDIATED_DEGRADATION_OF_P27_P21	0.11905	0.397226	up	42	0.30541	42	0
REACTOME_INTERFERON_ALPHA_BETA_SIGNALING	0.12026	0.399287	up	52	0.2905	51	1
REACTOME_NUCLEAR_SIGNALING_BY_ERBB4	0.12286	0.40592	up	35	0.31695	35	0
REACTOME_ASSOCIATION_OF_TRIC_CCT_WITH_TARGET_PROTEINS_DURING_BIOSYNTHESIS	0.12381	0.407063	up	25	0.34431	25	0
REACTOME_RECRUITMENT_OF_NUMA_TO_MITOTIC_CENTROSOMES	0.12506	0.409177	dn	9	-0.37784	9	0
REACTOME_LIPID_DIGESTION_MOBILIZATION_AND_TRANSPORT	0.12637	0.410915	up	43	0.30154	43	0
REACTOME_FORMATION_OF_TUBULIN_FOLDING_INTERMEDIATES_BY_CCT_TRIC	0.12767	0.410915	up	19	0.36944	19	0
REACTOME_REVERSIBLE_HYDRATION_OF_CARBON_DIOXIDE	0.12773	0.410915	up	12	0.42317	12	0
REACTOME_SULFUR_AMINO_ACID_METABOLISM	0.12803	0.410915	up	21	0.35947	21	0
REACTOME_TOLL_RECEPTOR_CASCADES	0.12866	0.41098	up	106	0.25263	106	0
REACTOME_SIGNALING_BY_FGFR_MUTANTS	0.12976	0.411425	up	41	0.30303	41	0
REACTOME_SIGNALING_BY_ILS	0.13002	0.411425	up	103	0.25313	103	0
REACTOME_ION_CHANNEL_TRANSPORT	0.13082	0.412022	up	53	0.28665	52	1
REACTOME_PI3K_CASCADE	0.13303	0.417034	up	60	0.27943	60	0
REACTOME_FORMATION_OF_TRANSCRIPTION_COUPLED_NER_TC_NER_REPAIR_COMPLEX	0.13482	0.420688	dn	23	-0.24037	23	0
REACTOME_INTERFERON_SIGNALING	0.13574	0.421607	up	133	0.24211	132	1
REACTOME_AMYLOIDS	0.13684	0.422686	up	35	0.31261	35	0
REACTOME_EXTRINSIC_PATHWAY_FOR_APOPTOSIS	0.13752	0.422686	up	12	0.41851	12	0
REACTOME_REGULATION_OF_SIGNALING_BY_CBL	0.13867	0.422686	up	17	0.37722	17	0
REACTOME_CS_DS_DEGRADATION	0.13906	0.422686	up	11	0.4294	11	0
REACTOME_PHOSPHORYLATION_OF_CD3_AND_TCR_ZETA_CHAINS	0.1393	0.422686	up	13	0.40782	13	0
REACTOME_HYALURONAN_METABOLISM	0.13985	0.422686	up	13	0.40759	13	0
REACTOME_SYNTHESIS_OF_PE	0.1407	0.423356	up	10	0.44272	10	0
REACTOME_NRAGE_SIGNALS_DEATH_THROUGH_JNK	0.14155	0.424021	up	40	0.30185	40	0
REACTOME_METABOLISM_OF_POLYAMINES	0.14417	0.429193	up	13	0.40552	13	0
REACTOME_IRON_UPTAKE_AND_TRANSPORT	0.14455	0.429193	up	34	0.31236	34	0
REACTOME_ENOS_ACTIVATION_AND_REGULATION	0.14632	0.432474	up	17	0.3742	17	0
REACTOME_SIGNALING_BY_NOTCH3	0.1474	0.432474	up	11	0.42555	11	0
REACTOME_MITOCHONDRIAL_TRNA_AMINOACYLATION	0.14758	0.432474	up	20	0.3573	20	0
REACTOME_G1_PHASE	0.14906	0.43379	up	32	0.31531	32	0
REACTOME_HS_GAG_BIOSYNTHESIS	0.1499	0.43379	up	27	0.32899	27	0
REACTOME_SIGNALING_BY_ERBB2	0.14996	0.43379	up	94	0.25352	94	0
REACTOME_G_PROTEIN_BETA_GAMMA_SIGNALLING	0.15078	0.433904	up	26	0.33168	26	0
REACTOME_TRANS_GOLGI_NETWORK_VESICLE_BUDDING	0.15264	0.433904	up	50	0.28517	50	0
REACTOME_GABA_SYNTHESIS_RELEASE_REUPTAKE_AND_DEGRADATION	0.15291	0.433904	up	16	0.37825	16	0
REACTOME_ER_PHAGOSOME_PATHWAY	0.15438	0.433904	up	46	0.28929	46	0
REACTOME_INNATE_IMMUNE_SYSTEM	0.15467	0.433904	up	218	0.2242	216	2
REACTOME_FORMATION_OF_INCISION_COMPLEX_IN_GG_NER	0.15561	0.433904	up	17	0.3705	17	0
REACTOME_ACTIVATION_OF_NF_KAPPAB_IN_B_CELLS	0.15636	0.433904	up	50	0.28422	50	0
REACTOME_PROSTANOID_LIGAND_RECEPTORS	0.15667	0.433904	up	8	0.46654	8	0
REACTOME_NEGATIVE_REGULATION_OF_THE_PI3K_AKT_NETWORK	0.15672	0.433904	up	7	0.48786	7	0
REACTOME_REGULATION_OF_INSULIN_LIKE_GROWTH_FACTOR_IGF_ACTIVITY_BY_INSULIN_LIKE_GROWTH_FACTOR_BINDING_PROTEINS_IGFBPS	0.15676	0.433904	up	15	0.38335	15	0
REACTOME_SIGNALING_BY_SCF_KIT	0.15751	0.433904	up	73	0.26356	73	0
REACTOME_HS_GAG_DEGRADATION	0.15827	0.433904	up	19	0.35756	19	0
REACTOME_CROSS_PRESENTATION_OF_SOLUBLE_EXOGENOUS_ANTIGENS_ENDOSOMES	0.15882	0.433904	up	35	0.30614	35	0
REACTOME_SHC_MEDIATED_CASCADE	0.15946	0.433904	up	28	0.32346	28	0
REACTOME_RECYCLING_OF_BILE_ACIDS_AND_SALTS	0.16018	0.433904	up	10	0.43329	10	0
REACTOME_ORC1_REMOVAL_FROM_CHROMATIN	0.1603	0.433904	up	55	0.27804	55	0
REACTOME_SIGNALING_BY_ACTIVATED_POINT_MUTANTS_OF_FGFR1	0.16139	0.43429	up	11	0.41908	11	0
REACTOME_NOREPINEPHRINE_NEUROTRANSMITTER_RELEASE_CYCLE	0.16178	0.43429	up	9	0.44646	9	0
REACTOME_YAP1_AND_WWTR1_TAZ_STIMULATED_GENE_EXPRESSION	0.16247	0.43429	up	23	0.3385	23	0
REACTOME_ACTIVATED_NOTCH1_TRANSMITS_SIGNAL_TO_THE_NUCLEUS	0.16302	0.43429	up	24	0.3344	24	0
REACTOME_RNA_POL_II_TRANSCRIPTION	0.16667	0.442266	dn	88	-0.25728	88	0
REACTOME_ACETYLCHOLINE_NEUROTRANSMITTER_RELEASE_CYCLE	0.17294	0.457104	up	8	0.45901	8	0
REACTOME_SYNTHESIS_OF_BILE_ACIDS_AND_BILE_SALTS_VIA_24_HYDROXYCHOLESTEROL	0.17374	0.457425	up	9	0.44103	9	0
REACTOME_ACTIVATION_OF_CHAPERONE_GENES_BY_XBP1S	0.17566	0.458118	up	41	0.29119	41	0
REACTOME_DOWNSTREAM_SIGNAL_TRANSDUCTION	0.17596	0.458118	up	88	0.25211	88	0
REACTOME_AUTODEGRADATION_OF_THE_E3_UBIQUITIN_LIGASE_COP1	0.1774	0.458118	up	37	0.29795	37	0
REACTOME_CLASS_B_2_SECRETIN_FAMILY_RECEPTORS	0.17885	0.458118	up	84	0.25304	84	0
REACTOME_CELL_DEATH_SIGNALLING_VIA_NRAGE_NRIF_AND_NADE	0.17919	0.458118	up	54	0.27422	54	0
REACTOME_XENOBIOTICS	0.17997	0.458118	up	11	0.41116	11	0
REACTOME_P130CAS_LINKAGE_TO_MAPK_SIGNALING_FOR_INTEGRINS	0.18021	0.458118	up	13	0.39086	13	0
REACTOME_P53_INDEPENDENT_G1_S_DNA_DAMAGE_CHECKPOINT	0.1805	0.458118	up	37	0.2972	37	0
REACTOME_TRANSPORT_OF_ORGANIC_ANIONS	0.18083	0.458118	up	10	0.42451	10	0
REACTOME_IL_7_SIGNALING	0.18108	0.458118	up	10	0.42441	10	0
REACTOME_EICOSANOID_LIGAND_BINDING_RECEPTORS	0.18148	0.458118	up	14	0.38201	14	0
REACTOME_CDC6_ASSOCIATION_WITH_THE_ORC_ORIGIN_COMPLEX	0.18293	0.460055	dn	11	-0.31991	11	0
REACTOME_DOWNREGULATION_OF_TGF_BETA_RECEPTOR_SIGNALING	0.18423	0.461091	up	19	0.34896	19	0
REACTOME_GASTRIN_CREB_SIGNALLING_PATHWAY_VIA_PKC_AND_MAPK	0.18471	0.461091	up	184	0.22571	184	0
REACTOME_IL1_SIGNALING	0.18768	0.466423	up	37	0.29545	37	0
REACTOME_SIGNALING_BY_EGFR_IN_CANCER	0.18823	0.466423	up	101	0.24455	101	0
REACTOME_COSTIMULATION_BY_THE_CD28_FAMILY	0.18932	0.466979	up	56	0.27128	56	0
REACTOME_ANTIGEN_PRESENTATION_FOLDING_ASSEMBLY_AND_PEPTIDE_LOADING_OF_CLASS_I_MHC	0.18984	0.466979	up	18	0.35289	18	0
REACTOME_ACTIVATED_TLR4_SIGNALLING	0.19135	0.468981	up	85	0.25101	85	0
REACTOME_SIGNALING_BY_NODAL	0.19402	0.473802	up	15	0.36985	15	0
REACTOME_PEPTIDE_CHAIN_ELONGATION	0.2	0.481073	dn	46	-0.17957	46	0
REACTOME_SIGNALING_BY_CONSTITUTIVELY_ACTIVE_EGFR	0.20065	0.481073	up	17	0.35509	17	0
REACTOME_GAP_JUNCTION_DEGRADATION	0.20119	0.481073	up	9	0.42945	9	0
REACTOME_TIE2_SIGNALING	0.20125	0.481073	up	16	0.36105	16	0
REACTOME_MEMBRANE_BINDING_AND_TARGETTING_OF_GAG_PROTEINS	0.20125	0.481073	up	9	0.42943	9	0
REACTOME_SEMA4D_IN_SEMAPHORIN_SIGNALING	0.20128	0.481073	up	29	0.30924	29	0
REACTOME_ACYL_CHAIN_REMODELLING_OF_PI	0.2023	0.481189	up	15	0.36704	15	0
REACTOME_POL_SWITCHING	0.203	0.481189	dn	11	-0.31313	11	0
REACTOME_SIGNALING_BY_TGF_BETA_RECEPTOR_COMPLEX	0.20347	0.481189	up	55	0.26935	55	0
REACTOME_LYSOSOME_VESICLE_BIOGENESIS	0.20459	0.481499	up	20	0.33884	20	0
REACTOME_SIGNALING_BY_FGFR1_MUTANTS	0.20503	0.481499	up	27	0.31342	27	0
REACTOME_REGULATION_OF_HYPOXIA_INDUCIBLE_FACTOR_HIF_BY_OXYGEN	0.20711	0.484695	dn	21	-0.2363	21	0
REACTOME_PI3K_EVENTS_IN_ERBB2_SIGNALING	0.20953	0.488662	up	41	0.28392	41	0
REACTOME_BRANCHED_CHAIN_AMINO_ACID_CATABOLISM	0.21229	0.493391	up	16	0.35741	16	0
REACTOME_DSCAM_INTERACTIONS	0.21332	0.494081	up	11	0.39874	11	0
REACTOME_REGULATION_OF_WATER_BALANCE_BY_RENAL_AQUAPORINS	0.21672	0.500237	up	41	0.28243	41	0
REACTOME_SIGNALING_BY_WNT	0.21853	0.502694	up	51	0.27005	51	0
REACTOME_NEPHRIN_INTERACTIONS	0.222	0.508356	up	18	0.34314	18	0
REACTOME_BASE_FREE_SUGAR_PHOSPHATE_REMOVAL_VIA_THE_SINGLE_NUCLEOTIDE_REPLACEMENT_PATHWAY	0.2225	0.508356	up	9	0.42123	9	0
REACTOME_SIGNALING_BY_FGFR_IN_DISEASE	0.22367	0.509303	up	117	0.2349	117	0
REACTOME_G1_S_TRANSITION	0.22677	0.514623	up	90	0.24337	90	0
REACTOME_SYNTHESIS_OF_DNA	0.23052	0.51889	up	77	0.24906	77	0
REACTOME_N_GLYCAN_ANTENNAE_ELONGATION_IN_THE_MEDIAL_TRANS_GOLGI	0.23061	0.51889	up	17	0.34608	17	0
REACTOME_FANCONI_ANEMIA_PATHWAY	0.23108	0.51889	dn	21	-0.23162	21	0
REACTOME_PYRUVATE_METABOLISM	0.23173	0.51889	up	17	0.34571	17	0
REACTOME_VITAMIN_B5_PANTOTHENATE_METABOLISM	0.23266	0.519248	up	11	0.39204	11	0
REACTOME_POST_TRANSLATIONAL_MODIFICATION_SYNTHESIS_OF_GPI_ANCHORED_PROTEINS	0.23375	0.519959	up	24	0.31483	24	0
REACTOME_CD28_DEPENDENT_PI3K_AKT_SIGNALING	0.23559	0.522328	up	20	0.32988	20	0
REACTOME_DOWNSTREAM_SIGNALING_OF_ACTIVATED_FGFR	0.23776	0.525411	up	95	0.24002	95	0
REACTOME_RECEPTOR_LIGAND_BINDING_INITIATES_THE_SECOND_PROTEOLYTIC_CLEAVAGE_OF_NOTCH_RECEPTOR	0.24017	0.528762	up	11	0.38947	11	0
REACTOME_CELL_CYCLE_MITOTIC	0.24123	0.528762	up	275	0.21075	275	0
REACTOME_COMPLEMENT_CASCADE	0.24163	0.528762	up	25	0.31018	25	0
REACTOME_SCF_BETA_TRCP_MEDIATED_DEGRADATION_OF_EMI1	0.243	0.529691	up	39	0.28036	39	0
REACTOME_N_GLYCAN_ANTENNAE_ELONGATION	0.24543	0.529691	up	13	0.36913	13	0
REACTOME_SIGNALING_BY_FGFR1_FUSION_MUTANTS	0.24588	0.529691	up	16	0.34741	16	0
REACTOME_ACYL_CHAIN_REMODELLING_OF_PE	0.24645	0.529691	up	20	0.32701	20	0
REACTOME_LIGAND_GATED_ION_CHANNEL_TRANSPORT	0.24672	0.529691	up	21	0.3231	20	1
REACTOME_ION_TRANSPORT_BY_P_TYPE_ATPASES	0.24677	0.529691	up	32	0.29157	32	0
REACTOME_UNFOLDED_PROTEIN_RESPONSE	0.24874	0.530901	up	70	0.25009	70	0
REACTOME_MYD88_MAL_CASCADE_INITIATED_ON_PLASMA_MEMBRANE	0.24972	0.530901	up	76	0.24711	76	0
REACTOME_ACTIVATION_OF_KAINATE_RECEPTORS_UPON_GLUTAMATE_BINDING	0.25051	0.530901	up	29	0.29791	29	0
REACTOME_G_ALPHA_I_SIGNALLING_EVENTS	0.25081	0.530901	up	166	0.22151	166	0
REACTOME_BMAL1_CLOCK_NPAS2_ACTIVATES_CIRCADIAN_EXPRESSION	0.25188	0.530901	up	35	0.28471	35	0
REACTOME_TCR_SIGNALING	0.25206	0.530901	up	45	0.27097	45	0
REACTOME_TGF_BETA_RECEPTOR_SIGNALING_ACTIVATES_SMADS	0.25378	0.532859	up	21	0.32132	21	0
REACTOME_IL_6_SIGNALING	0.2564	0.536688	up	10	0.39633	10	0
REACTOME_E2F_ENABLED_INHIBITION_OF_PRE_REPLICATION_COMPLEX_FORMATION	0.25927	0.538973	dn	10	-0.31331	10	0
REACTOME_FORMATION_OF_ATP_BY_CHEMIOSMOTIC_COUPLING	0.25953	0.538973	up	11	0.38308	11	0
REACTOME_RIG_I_MDA5_MEDIATED_INDUCTION_OF_IFN_ALPHA_BETA_PATHWAYS	0.26035	0.538973	up	64	0.25242	63	1
REACTOME_GABA_A_RECEPTOR_ACTIVATION	0.26069	0.538973	up	12	0.3732	12	0
REACTOME_NEGATIVE_REGULATORS_OF_RIG_I_MDA5_SIGNALING	0.26416	0.542326	up	29	0.29504	29	0
REACTOME_TRANSFERRIN_ENDOCYTOSIS_AND_RECYCLING	0.26524	0.542326	up	23	0.31084	23	0
REACTOME_ANTIGEN_PROCESSING_UBIQUITINATION_PROTEASOME_DEGRADATION	0.26529	0.542326	up	178	0.21829	178	0
REACTOME_EXTENSION_OF_TELOMERES	0.26557	0.542326	dn	24	-0.21265	24	0
REACTOME_INTRINSIC_PATHWAY_FOR_APOPTOSIS	0.26672	0.542326	up	26	0.30121	26	0
REACTOME_CDT1_ASSOCIATION_WITH_THE_CDC6_ORC_ORIGIN_COMPLEX	0.26714	0.542326	up	44	0.26921	44	0
REACTOME_CRMPS_IN_SEMA3A_SIGNALING	0.26856	0.542731	up	14	0.35391	14	0
REACTOME_TRAFFICKING_OF_AMPA_RECEPTORS	0.26895	0.542731	up	25	0.30381	25	0
REACTOME_SIGNALING_BY_NOTCH1	0.27175	0.546745	up	64	0.25076	64	0
REACTOME_ABCA_TRANSPORTERS_IN_LIPID_HOMEOSTASIS	0.27273	0.547083	up	15	0.34551	15	0
REACTOME_REGULATION_OF_THE_FANCONI_ANEMIA_PATHWAY	0.27437	0.54763	dn	7	-0.36486	7	0
REACTOME_CELL_CYCLE	0.27646	0.54763	up	335	0.20476	335	0
REACTOME_POST_NMDA_RECEPTOR_ACTIVATION_EVENTS	0.27706	0.54763	up	31	0.288	31	0
REACTOME_DNA_REPLICATION	0.27786	0.54763	up	166	0.21898	166	0
REACTOME_PI_3K_CASCADE	0.2788	0.54763	up	53	0.25831	53	0
REACTOME_TRAF6_MEDIATED_NFKB_ACTIVATION	0.28001	0.54763	up	18	0.32777	18	0
REACTOME_P75NTR_RECRUITS_SIGNALLING_COMPLEXES	0.28046	0.54763	up	11	0.37649	11	0
REACTOME_TRAF6_MEDIATED_INDUCTION_OF_TAK1_COMPLEX	0.28117	0.54763	up	12	0.36709	12	0
REACTOME_G_ALPHA1213_SIGNALLING_EVENTS	0.28203	0.54763	up	69	0.24655	69	0
REACTOME_PECAM1_INTERACTIONS	0.28316	0.54763	up	9	0.39985	9	0
REACTOME_CDK_MEDIATED_PHOSPHORYLATION_AND_REMOVAL_OF_CDC6	0.28368	0.54763	up	36	0.27733	36	0
REACTOME_NEUROTRANSMITTER_RECEPTOR_BINDING_AND_DOWNSTREAM_TRANSMISSION_IN_THE_POSTSYNAPTIC_CELL	0.28437	0.54763	up	128	0.22521	128	0
REACTOME_KERATAN_SULFATE_DEGRADATION	0.28442	0.54763	up	10	0.38727	10	0
REACTOME_SIGNAL_REGULATORY_PROTEIN_SIRP_FAMILY_INTERACTIONS	0.28503	0.54763	up	11	0.37503	11	0
REACTOME_RESOLUTION_OF_AP_SITES_VIA_THE_MULTIPLE_NUCLEOTIDE_PATCH_REPLACEMENT_PATHWAY	0.28519	0.54763	up	13	0.35729	13	0
REACTOME_RIP_MEDIATED_NFKB_ACTIVATION_VIA_DAI	0.2861	0.547816	up	15	0.34189	15	0
REACTOME_TANDEM_PORE_DOMAIN_POTASSIUM_CHANNELS	0.28774	0.549396	up	10	0.38614	10	0
REACTOME_TRAFFICKING_OF_GLUR2_CONTAINING_AMPA_RECEPTORS	0.2927	0.557288	up	13	0.35517	13	0
REACTOME_RAP1_SIGNALLING	0.29402	0.557754	up	15	0.33985	15	0
REACTOME_GENERATION_OF_SECOND_MESSENGER_MOLECULES	0.2946	0.557754	up	23	0.30424	23	0
REACTOME_PI3K_EVENTS_IN_ERBB4_SIGNALING	0.29631	0.557937	up	35	0.27639	35	0
REACTOME_MITOTIC_G1_G1_S_PHASES	0.29657	0.557937	up	113	0.22762	113	0
REACTOME_GAB1_SIGNALOSOME	0.29718	0.557937	up	35	0.27624	35	0
REACTOME_REGULATION_OF_RHEB_GTPASE_ACTIVITY_BY_AMPK	0.29857	0.558113	up	10	0.38287	10	0
REACTOME_REPAIR_SYNTHESIS_FOR_GAP_FILLING_BY_DNA_POL_IN_TC_NER	0.29893	0.558113	up	12	0.36201	12	0
REACTOME_GLYCOGEN_BREAKDOWN_GLYCOGENOLYSIS	0.30367	0.563234	up	15	0.33735	15	0
REACTOME_BOTULINUM_NEUROTOXICITY	0.3039	0.563234	up	16	0.33178	16	0
REACTOME_GRB2_EVENTS_IN_ERBB2_SIGNALING	0.30418	0.563234	up	22	0.30563	22	0
REACTOME_CELL_CYCLE_CHECKPOINTS	0.30785	0.567099	up	97	0.23099	97	0
REACTOME_METAL_ION_SLC_TRANSPORTERS	0.30795	0.567099	up	21	0.30846	21	0
REACTOME_REGULATION_OF_APOPTOSIS	0.31028	0.569833	up	46	0.25991	46	0
REACTOME_REGULATION_OF_MRNA_STABILITY_BY_PROTEINS_THAT_BIND_AU_RICH_ELEMENTS	0.31195	0.570095	up	64	0.24526	64	0
REACTOME_RORA_ACTIVATES_CIRCADIAN_EXPRESSION	0.31265	0.570095	up	23	0.30051	23	0
REACTOME_NEF_MEDIATED_DOWNREGULATION_OF_MHC_CLASS_I_COMPLEX_CELL_SURFACE_EXPRESSION	0.31296	0.570095	up	9	0.39015	9	0
REACTOME_PYRIMIDINE_CATABOLISM	0.31489	0.572064	up	11	0.36601	11	0
REACTOME_GABA_RECEPTOR_ACTIVATION	0.31626	0.572953	up	51	0.25427	51	0
REACTOME_REGULATION_OF_MITOTIC_CELL_CYCLE	0.31822	0.572953	up	64	0.24442	64	0
REACTOME_TRAF6_MEDIATED_INDUCTION_OF_NFKB_AND_MAP_KINASES_UPON_TLR7_8_OR_9_ACTIVATION	0.31925	0.572953	up	70	0.24066	70	0
REACTOME_TRAF6_MEDIATED_IRF7_ACTIVATION	0.31955	0.572953	dn	25	-0.20327	24	1
REACTOME_MHC_CLASS_II_ANTIGEN_PRESENTATION	0.32036	0.572953	up	79	0.23647	79	0
REACTOME_NUCLEOTIDE_BINDING_DOMAIN_LEUCINE_RICH_REPEAT_CONTAINING_RECEPTOR_NLR_SIGNALING_PATHWAYS	0.32076	0.572953	up	42	0.26274	42	0
REACTOME_ASSOCIATION_OF_LICENSING_FACTORS_WITH_THE_PRE_REPLICATIVE_COMPLEX	0.32193	0.572953	dn	13	-0.26466	13	0
REACTOME_MITOTIC_M_M_G1_PHASES	0.32271	0.572953	up	149	0.2177	149	0
REACTOME_SIGNALING_BY_NOTCH	0.32354	0.572953	up	92	0.2313	92	0
REACTOME_ACYL_CHAIN_REMODELLING_OF_PS	0.32388	0.572953	up	14	0.33907	14	0
REACTOME_FACTORS_INVOLVED_IN_MEGAKARYOCYTE_DEVELOPMENT_AND_PLATELET_PRODUCTION	0.32541	0.574153	up	107	0.22588	106	1
REACTOME_RESOLUTION_OF_AP_SITES_VIA_THE_SINGLE_NUCLEOTIDE_REPLACEMENT_PATHWAY	0.32668	0.574889	up	11	0.36259	11	0
REACTOME_TRANSCRIPTIONAL_ACTIVITY_OF_SMAD2_SMAD3_SMAD4_HETEROTRIMER	0.33004	0.579289	up	35	0.27054	35	0
REACTOME_TGF_BETA_RECEPTOR_SIGNALING_IN_EMT_EPITHELIAL_TO_MESENCHYMAL_TRANSITION	0.332	0.579537	up	12	0.35271	12	0
REACTOME_MRNA_SPLICING	0.33333	0.579537	dn	98	-0.26276	98	0
REACTOME_TETRAHYDROBIOPTERIN_BH4_SYNTHESIS_RECYCLING_SALVAGE_AND_REGULATION	0.33496	0.579537	up	10	0.37193	10	0
REACTOME_SIGNALING_BY_FGFR	0.33498	0.579537	up	105	0.22589	105	0
REACTOME_P75NTR_SIGNALS_VIA_NFKB	0.33502	0.579537	up	13	0.34355	13	0
REACTOME_TRANSLATION	0.33569	0.579537	up	97	0.22801	97	0
REACTOME_IKK_COMPLEX_RECRUITMENT_MEDIATED_BY_RIP1	0.3362	0.579537	up	8	0.39769	8	0
REACTOME_NFKB_AND_MAP_KINASES_ACTIVATION_MEDIATED_BY_TLR4_SIGNALING_REPERTOIRE	0.33833	0.580429	up	66	0.24116	66	0
REACTOME_SHC1_EVENTS_IN_ERBB4_SIGNALING	0.33844	0.580429	up	20	0.30514	20	0
REACTOME_ACYL_CHAIN_REMODELLING_OF_PG	0.34324	0.587167	up	16	0.32223	16	0
REACTOME_PYRIMIDINE_METABOLISM	0.34559	0.58969	up	22	0.2968	22	0
REACTOME_DESTABILIZATION_OF_MRNA_BY_AUF1_HNRNP_D0	0.35031	0.596235	up	37	0.26421	37	0
REACTOME_GROWTH_HORMONE_RECEPTOR_SIGNALING	0.35167	0.596676	up	22	0.29556	22	0
REACTOME_UNWINDING_OF_DNA	0.35234	0.596676	up	11	0.3554	11	0
REACTOME_PROTEIN_FOLDING	0.35468	0.599134	up	47	0.25249	47	0
REACTOME_CIRCADIAN_REPRESSION_OF_EXPRESSION_BY_REV_ERBA	0.35718	0.600161	up	22	0.29447	22	0
REACTOME_BASE_EXCISION_REPAIR	0.35822	0.600161	up	15	0.32371	15	0
REACTOME_ANTIGEN_ACTIVATES_B_CELL_RECEPTOR_LEADING_TO_GENERATION_OF_SECOND_MESSENGERS	0.35859	0.600161	up	27	0.28092	27	0
REACTOME_TAK1_ACTIVATES_NFKB_BY_PHOSPHORYLATION_AND_ACTIVATION_OF_IKKS_COMPLEX	0.35885	0.600161	up	21	0.29744	21	0
REACTOME_GLYCOLYSIS	0.36063	0.601645	up	22	0.29373	22	0
REACTOME_NEF_MEDIATES_DOWN_MODULATION_OF_CELL_SURFACE_RECEPTORS_BY_RECRUITING_THEM_TO_CLATHRIN_ADAPTERS	0.36299	0.604087	up	18	0.30801	18	0
REACTOME_M_G1_TRANSITION	0.36408	0.604409	up	67	0.23723	67	0
REACTOME_INITIAL_TRIGGERING_OF_COMPLEMENT	0.36961	0.611328	up	10	0.36218	10	0
REACTOME_SEMA3A_PAK_DEPENDENT_AXON_REPULSION	0.37013	0.611328	up	14	0.3275	14	0
REACTOME_ACTIVATION_OF_RAC	0.37168	0.611328	up	12	0.34189	12	0
REACTOME_NFKB_ACTIVATION_THROUGH_FADD_RIP1_PATHWAY_MEDIATED_BY_CASPASE_8_AND10	0.37269	0.611328	up	11	0.35018	11	0
REACTOME_PLATELET_SENSITIZATION_BY_LDL	0.37364	0.611328	up	15	0.3202	15	0
REACTOME_SEMA4D_INDUCED_CELL_MIGRATION_AND_GROWTH_CONE_COLLAPSE	0.37369	0.611328	up	24	0.28522	24	0
REACTOME_INSULIN_RECEPTOR_RECYCLING	0.378	0.615929	up	20	0.2969	20	0
REACTOME_REMOVAL_OF_THE_FLAP_INTERMEDIATE_FROM_THE_C_STRAND	0.37833	0.615929	up	7	0.40173	7	0
REACTOME_NEURONAL_SYSTEM	0.3829	0.620884	up	261	0.20207	261	0
REACTOME_RECYCLING_PATHWAY_OF_L1	0.38329	0.620884	up	24	0.28334	24	0
REACTOME_TRIF_MEDIATED_TLR3_SIGNALING	0.38512	0.620884	up	68	0.23401	68	0
REACTOME_PD1_SIGNALING	0.38555	0.620884	up	15	0.31744	15	0
REACTOME_VIF_MEDIATED_DEGRADATION_OF_APOBEC3G	0.38598	0.620884	up	40	0.25513	40	0
REACTOME_REGULATION_OF_KIT_SIGNALING	0.39008	0.624919	up	16	0.31136	16	0
REACTOME_INTEGRATION_OF_PROVIRUS	0.39113	0.624919	up	7	0.3977	7	0
REACTOME_PROCESSIVE_SYNTHESIS_ON_THE_LAGGING_STRAND	0.39127	0.624919	dn	12	-0.26156	12	0
REACTOME_MYOGENESIS	0.39392	0.627664	up	25	0.27855	25	0
REACTOME_ADVANCED_GLYCOSYLATION_ENDPRODUCT_RECEPTOR_SIGNALING	0.39669	0.630587	up	11	0.34393	11	0
REACTOME_BIOSYNTHESIS_OF_THE_N_GLYCAN_PRECURSOR_DOLICHOL_LIPID_LINKED_OLIGOSACCHARIDE_LLO_AND_TRANSFER_TO_A_NASCENT_PROTEIN	0.3988	0.63245	up	25	0.27767	25	0
REACTOME_SYNTHESIS_OF_PIPS_AT_THE_EARLY_ENDOSOME_MEMBRANE	0.40135	0.632827	up	12	0.33433	12	0
REACTOME_ASSEMBLY_OF_THE_PRE_REPLICATIVE_COMPLEX	0.40168	0.632827	up	53	0.24095	53	0
REACTOME_APC_C_CDH1_MEDIATED_DEGRADATION_OF_CDC20_AND_OTHER_APC_C_CDH1_TARGETED_PROTEINS_IN_LATE_MITOSIS_EARLY_G1	0.40456	0.632827	up	52	0.24123	52	0
REACTOME_ACTIVATION_OF_ATR_IN_RESPONSE_TO_REPLICATION_STRESS	0.40465	0.632827	up	35	0.25844	35	0
REACTOME_REGULATION_OF_PYRUVATE_DEHYDROGENASE_PDH_COMPLEX	0.40505	0.632827	up	12	0.33339	12	0
REACTOME_OPSINS	0.40552	0.632827	up	7	0.39344	7	0
REACTOME_NUCLEAR_RECEPTOR_TRANSCRIPTION_PATHWAY	0.40561	0.632827	up	46	0.24585	46	0
REACTOME_ENDOSOMAL_VACUOLAR_PATHWAY	0.40877	0.634973	up	7	0.39243	7	0
REACTOME_AQUAPORIN_MEDIATED_TRANSPORT	0.40887	0.634973	up	47	0.24478	47	0
REACTOME_REGULATION_OF_AMPK_ACTIVITY_VIA_LKB1	0.41048	0.63526	up	12	0.33199	12	0
REACTOME_GRB2_SOS_PROVIDES_LINKAGE_TO_MAPK_SIGNALING_FOR_INTERGRINS_	0.41094	0.63526	up	13	0.32479	13	0
REACTOME_THE_ROLE_OF_NEF_IN_HIV1_REPLICATION_AND_DISEASE_PATHOGENESIS	0.4152	0.637875	up	25	0.27476	25	0
REACTOME_ACTIVATED_POINT_MUTANTS_OF_FGFR2	0.41583	0.637875	up	16	0.3055	16	0
REACTOME_SHC_RELATED_EVENTS	0.41807	0.637875	up	16	0.30507	16	0
REACTOME_VEGF_LIGAND_RECEPTOR_INTERACTIONS	0.4191	0.637875	up	10	0.34879	10	0
REACTOME_CREB_PHOSPHORYLATION_THROUGH_THE_ACTIVATION_OF_RAS	0.41932	0.637875	up	25	0.27407	25	0
REACTOME_SYNTHESIS_OF_PIPS_AT_THE_GOLGI_MEMBRANE	0.42033	0.637875	up	15	0.30968	15	0
REACTOME_HOST_INTERACTIONS_OF_HIV_FACTORS	0.42135	0.637875	up	107	0.21676	107	0
REACTOME_ACTIVATION_OF_IRF3_IRF7_MEDIATED_BY_TBK1_IKK_EPSILON	0.42242	0.637875	up	12	0.32907	12	0
REACTOME_ELEVATION_OF_CYTOSOLIC_CA2_LEVELS	0.42282	0.637875	up	7	0.38826	7	0
REACTOME_APC_C_CDC20_MEDIATED_DEGRADATION_OF_MITOTIC_PROTEINS	0.42451	0.637875	up	52	0.23872	52	0
REACTOME_DOWNSTREAM_TCR_SIGNALING	0.42682	0.637875	up	29	0.2643	29	0
REACTOME_GENERIC_TRANSCRIPTION_PATHWAY	0.4284	0.637875	up	291	0.19772	290	1
REACTOME_OPIOID_SIGNALLING	0.42973	0.637875	up	73	0.22663	73	0
REACTOME_SIGNALING_BY_BMP	0.43357	0.637875	up	22	0.27942	22	0
REACTOME_OXYGEN_DEPENDENT_PROLINE_HYDROXYLATION_OF_HYPOXIA_INDUCIBLE_FACTOR_ALPHA	0.4349	0.637875	dn	14	-0.23621	14	0
REACTOME_P38MAPK_EVENTS	0.43561	0.637875	up	13	0.31883	13	0
REACTOME_PKB_MEDIATED_EVENTS	0.43593	0.637875	up	23	0.27621	23	0
REACTOME_INTRINSIC_PATHWAY	0.43603	0.637875	up	16	0.30102	16	0
REACTOME_GLOBAL_GENOMIC_NER_GG_NER	0.43628	0.637875	up	27	0.26689	27	0
REACTOME_SYNTHESIS_OF_PIPS_AT_THE_PLASMA_MEMBRANE	0.43725	0.637875	up	27	0.26674	27	0
REACTOME_SYNTHESIS_OF_SUBSTRATES_IN_N_GLYCAN_BIOSYTHESIS	0.43777	0.637875	up	13	0.31834	13	0
REACTOME_CTLA4_INHIBITORY_SIGNALING	0.43786	0.637875	up	20	0.28475	20	0
REACTOME_POST_CHAPERONIN_TUBULIN_FOLDING_PATHWAY	0.43893	0.637875	up	16	0.30042	16	0
REACTOME_HIV_INFECTION	0.43921	0.637875	up	168	0.20589	168	0
REACTOME_MRNA_DECAY_BY_3_TO_5_EXORIBONUCLEASE	0.43929	0.637875	up	9	0.3538	9	0
REACTOME_DCC_MEDIATED_ATTRACTIVE_SIGNALING	0.43962	0.637875	up	13	0.31791	13	0
REACTOME_NGF_SIGNALLING_VIA_TRKA_FROM_THE_PLASMA_MEMBRANE	0.44054	0.637875	up	126	0.2116	126	0
REACTOME_MAP_KINASE_ACTIVATION_IN_TLR_CASCADE	0.44092	0.637875	up	47	0.24026	47	0
REACTOME_IMMUNOREGULATORY_INTERACTIONS_BETWEEN_A_LYMPHOID_AND_A_NON_LYMPHOID_CELL	0.44155	0.637875	up	48	0.23957	48	0
REACTOME_SHC1_EVENTS_IN_EGFR_SIGNALING	0.44197	0.637875	up	15	0.30505	15	0
REACTOME_SHC_MEDIATED_SIGNALLING	0.44197	0.637875	up	15	0.30505	15	0
REACTOME_NOTCH1_INTRACELLULAR_DOMAIN_REGULATES_TRANSCRIPTION	0.44352	0.638346	up	42	0.24434	42	0
REACTOME_GPCR_LIGAND_BINDING	0.44419	0.638346	up	349	0.1945	347	2
REACTOME_ERK_MAPK_TARGETS	0.44571	0.639167	up	20	0.28311	20	0
REACTOME_SIGNAL_ATTENUATION	0.45019	0.644221	up	12	0.3224	12	0
REACTOME_REGULATED_PROTEOLYSIS_OF_P75NTR	0.45741	0.652466	up	9	0.34904	9	0
REACTOME_LOSS_OF_NLP_FROM_MITOTIC_CENTROSOMES	0.45858	0.652466	up	53	0.23358	53	0
REACTOME_FORMATION_OF_THE_TERNARY_COMPLEX_AND_SUBSEQUENTLY_THE_43S_COMPLEX	0.45975	0.652466	up	31	0.25509	31	0
REACTOME_RNA_POL_III_TRANSCRIPTION_INITIATION_FROM_TYPE_3_PROMOTER	0.46068	0.652466	up	25	0.2668	25	0
REACTOME_PI_METABOLISM	0.4609	0.652466	up	42	0.24192	42	0
REACTOME_INHIBITION_OF_THE_PROTEOLYTIC_ACTIVITY_OF_APC_C_REQUIRED_FOR_THE_ONSET_OF_ANAPHASE_BY_MITOTIC_SPINDLE_CHECKPOINT_COMPONENTS	0.46176	0.652466	dn	15	-0.22619	15	0
REACTOME_ANTIVIRAL_MECHANISM_BY_IFN_STIMULATED_GENES	0.4674	0.657276	up	60	0.22855	60	0
REACTOME_SOS_MEDIATED_SIGNALLING	0.4677	0.657276	up	14	0.30503	14	0
REACTOME_TRANSCRIPTIONAL_REGULATION_OF_WHITE_ADIPOCYTE_DIFFERENTIATION	0.46809	0.657276	up	69	0.2242	69	0
REACTOME_E2F_MEDIATED_REGULATION_OF_DNA_REPLICATION	0.4705	0.658632	up	30	0.25547	30	0
REACTOME_PREFOLDIN_MEDIATED_TRANSFER_OF_SUBSTRATE_TO_CCT_TRIC	0.47101	0.658632	up	24	0.26732	24	0
REACTOME_NCAM_SIGNALING_FOR_NEURITE_OUT_GROWTH	0.47632	0.661611	up	64	0.22542	64	0
REACTOME_DNA_REPAIR	0.47933	0.661611	up	94	0.21437	94	0
REACTOME_ACTIVATION_OF_THE_PRE_REPLICATIVE_COMPLEX	0.48017	0.661611	up	29	0.25546	29	0
REACTOME_ZINC_TRANSPORTERS	0.48064	0.661611	up	14	0.30222	14	0
REACTOME_TRANSLOCATION_OF_ZAP_70_TO_IMMUNOLOGICAL_SYNAPSE	0.48094	0.661611	up	11	0.32283	11	0
REACTOME_PERK_REGULATED_GENE_EXPRESSION	0.482	0.661611	up	24	0.26543	24	0
REACTOME_FGFR1_LIGAND_BINDING_AND_ACTIVATION	0.48228	0.661611	up	14	0.30189	14	0
REACTOME_PHOSPHOLIPASE_C_MEDIATED_CASCADE	0.48234	0.661611	up	52	0.23122	52	0
REACTOME_DESTABILIZATION_OF_MRNA_BY_TRISTETRAPROLIN_TTP	0.48285	0.661611	up	14	0.30174	14	0
REACTOME_MAPK_TARGETS_NUCLEAR_EVENTS_MEDIATED_BY_MAP_KINASES	0.48403	0.661611	up	29	0.25482	29	0
REACTOME_PIP3_ACTIVATES_AKT_SIGNALING	0.48478	0.661611	up	26	0.26008	26	0
REACTOME_FRS2_MEDIATED_CASCADE	0.48492	0.661611	up	36	0.24483	36	0
REACTOME_AUTODEGRADATION_OF_CDH1_BY_CDH1_APC_C	0.48997	0.665403	up	44	0.2362	44	0
REACTOME_ACETYLCHOLINE_BINDING_AND_DOWNSTREAM_EVENTS	0.49032	0.665403	dn	13	-0.23662	13	0
REACTOME_PROTEOLYTIC_CLEAVAGE_OF_SNARE_COMPLEX_PROTEINS	0.49182	0.665403	up	14	0.29969	14	0
REACTOME_TRYPTOPHAN_CATABOLISM	0.49298	0.665403	up	11	0.32003	11	0
REACTOME_ACTIVATION_OF_THE_MRNA_UPON_BINDING_OF_THE_CAP_BINDING_COMPLEX_AND_EIFS_AND_SUBSEQUENT_BINDING_TO_43S	0.49316	0.665403	up	34	0.24615	34	0
REACTOME_RNA_POL_III_TRANSCRIPTION	0.49367	0.665403	up	32	0.2485	32	0
REACTOME_CALNEXIN_CALRETICULIN_CYCLE	0.49461	0.665403	up	11	0.31965	11	0
REACTOME_PROLACTIN_RECEPTOR_SIGNALING	0.4973	0.66769	up	12	0.31112	12	0
REACTOME_PHOSPHORYLATION_OF_THE_APC_C	0.50065	0.670162	dn	15	-0.22088	15	0
REACTOME_N_GLYCAN_TRIMMING_IN_THE_ER_AND_CALNEXIN_CALRETICULIN_CYCLE	0.50113	0.670162	up	13	0.3042	13	0
REACTOME_IL_3_5_AND_GM_CSF_SIGNALING	0.51033	0.679718	up	42	0.23486	42	0
REACTOME_CIRCADIAN_CLOCK	0.51088	0.679718	up	50	0.229	50	0
REACTOME_SYNTHESIS_OF_GLYCOSYLPHOSPHATIDYLINOSITOL_GPI	0.51167	0.679718	up	16	0.28547	16	0
REACTOME_COPI_MEDIATED_TRANSPORT	0.51231	0.679718	dn	9	-0.27326	9	0
REACTOME_REGULATION_OF_IFNG_SIGNALING	0.51337	0.679787	up	13	0.30158	13	0
REACTOME_THE_ACTIVATION_OF_ARYLSULFATASES	0.51712	0.68341	up	10	0.32405	10	0
REACTOME_SPRY_REGULATION_OF_FGF_SIGNALING	0.51925	0.684882	dn	12	-0.24063	12	0
REACTOME_PEPTIDE_HORMONE_BIOSYNTHESIS	0.52251	0.686902	up	10	0.32271	10	0
REACTOME_INHIBITION_OF_VOLTAGE_GATED_CA2_CHANNELS_VIA_GBETA_GAMMA_SUBUNITS	0.52282	0.686902	up	24	0.25842	24	0
REACTOME_PRE_NOTCH_TRANSCRIPTION_AND_TRANSLATION	0.52886	0.693486	up	23	0.25933	23	0
REACTOME_APOBEC3G_MEDIATED_RESISTANCE_TO_HIV1_INFECTION	0.53277	0.697256	up	5	0.39765	5	0
REACTOME_PRE_NOTCH_EXPRESSION_AND_PROCESSING	0.53491	0.6987	up	38	0.23515	38	0
REACTOME_BILE_SALT_AND_ORGANIC_ANION_SLC_TRANSPORTERS	0.53819	0.701625	up	10	0.31881	10	0
REACTOME_TRAF3_DEPENDENT_IRF_ACTIVATION_PATHWAY	0.54051	0.703289	up	14	0.2892	14	0
REACTOME_GABA_B_RECEPTOR_ACTIVATION	0.54168	0.703453	up	37	0.23527	37	0
REACTOME_NA_CL_DEPENDENT_NEUROTRANSMITTER_TRANSPORTERS	0.54308	0.703716	up	16	0.27889	16	0
REACTOME_SIGNALLING_TO_ERKS	0.54397	0.703716	up	36	0.236	36	0
REACTOME_MITOTIC_G2_G2_M_PHASES	0.54772	0.707209	up	73	0.21395	73	0
REACTOME_DESTABILIZATION_OF_MRNA_BY_BRF1	0.55184	0.710596	up	14	0.28681	14	0
REACTOME_CLASS_A1_RHODOPSIN_LIKE_RECEPTORS	0.5539	0.710596	up	252	0.19229	250	2
REACTOME_NUCLEAR_EVENTS_KINASE_AND_TRANSCRIPTION_FACTOR_ACTIVATION	0.55438	0.710596	up	23	0.25473	23	0
REACTOME_HDL_MEDIATED_LIPID_TRANSPORT	0.55456	0.710596	up	14	0.28626	14	0
REACTOME_REGULATION_OF_INSULIN_SECRETION_BY_GLUCAGON_LIKE_PEPTIDE1	0.55933	0.715348	up	40	0.22998	40	0
REACTOME_NOTCH_HLH_TRANSCRIPTION_PATHWAY	0.56354	0.719367	up	12	0.29604	12	0
REACTOME_RNA_POL_III_TRANSCRIPTION_TERMINATION	0.56551	0.720517	up	18	0.26669	18	0
REACTOME_IRAK2_MEDIATED_ACTIVATION_OF_TAK1_COMPLEX_UPON_TLR7_8_OR_9_STIMULATION	0.56734	0.721485	dn	8	-0.27694	8	0
REACTOME_GLUCAGON_SIGNALING_IN_METABOLIC_REGULATION	0.57109	0.724886	up	32	0.23646	32	0
REACTOME_GLUCAGON_TYPE_LIGAND_RECEPTORS	0.57523	0.728769	up	32	0.23576	32	0
REACTOME_PI3K_AKT_ACTIVATION	0.57677	0.729349	up	34	0.2334	34	0
REACTOME_ACTIVATION_OF_GENES_BY_ATF4	0.57799	0.729523	up	21	0.2554	21	0
REACTOME_GLYCOPROTEIN_HORMONES	0.58396	0.732834	up	8	0.32928	8	0
REACTOME_DESTABILIZATION_OF_MRNA_BY_KSRP	0.58415	0.732834	up	15	0.27491	15	0
REACTOME_SIGNALLING_TO_RAS	0.58473	0.732834	up	27	0.24142	27	0
REACTOME_INWARDLY_RECTIFYING_K_CHANNELS	0.58504	0.732834	up	30	0.23711	30	0
REACTOME_DEFENSINS	0.58605	0.732834	up	19	0.25923	18	1
REACTOME_LATENT_INFECTION_OF_HOMO_SAPIENS_WITH_MYCOBACTERIUM_TUBERCULOSIS	0.58818	0.73304	up	28	0.23954	28	0
REACTOME_ERKS_ARE_INACTIVATED	0.58839	0.73304	up	11	0.29757	11	0
REACTOME_CLASS_C_3_METABOTROPIC_GLUTAMATE_PHEROMONE_RECEPTORS	0.5903	0.734063	dn	13	-0.22192	13	0
REACTOME_RAF_MAP_KINASE_CASCADE	0.5956	0.737529	up	10	0.30496	10	0
REACTOME_NEGATIVE_REGULATION_OF_FGFR_SIGNALING	0.59576	0.737529	up	35	0.22944	35	0
REACTOME_ROLE_OF_DCC_IN_REGULATING_APOPTOSIS	0.59637	0.737529	up	10	0.30479	10	0
REACTOME_PLC_BETA_MEDIATED_EVENTS	0.60087	0.740451	up	41	0.22294	41	0
REACTOME_ENERGY_DEPENDENT_REGULATION_OF_MTOR_BY_LKB1_AMPK	0.60093	0.740451	up	15	0.27146	15	0
REACTOME_RNA_POL_III_CHAIN_ELONGATION	0.60352	0.740862	up	16	0.26666	16	0
REACTOME_PROLONGED_ERK_ACTIVATION_EVENTS	0.60557	0.740862	up	19	0.25547	19	0
REACTOME_SLBP_DEPENDENT_PROCESSING_OF_REPLICATION_DEPENDENT_HISTONE_PRE_MRNAS	0.60565	0.740862	up	9	0.31188	9	0
REACTOME_G2_M_CHECKPOINTS	0.60566	0.740862	up	40	0.22336	40	0
REACTOME_ACTIVATED_TAK1_MEDIATES_P38_MAPK_ACTIVATION	0.61093	0.745954	up	16	0.26511	16	0
REACTOME_PYRUVATE_METABOLISM_AND_CITRIC_ACID_TCA_CYCLE	0.61397	0.748311	up	35	0.22681	35	0
REACTOME_DOPAMINE_NEUROTRANSMITTER_RELEASE_CYCLE	0.61626	0.749746	up	10	0.30017	10	0
REACTOME_RECRUITMENT_OF_MITOTIC_CENTROSOME_PROTEINS_AND_COMPLEXES	0.61872	0.751382	up	59	0.2109	59	0
REACTOME_INTEGRIN_ALPHAIIB_BETA3_SIGNALING	0.62341	0.754807	up	25	0.23866	25	0
REACTOME_AKT_PHOSPHORYLATES_TARGETS_IN_THE_CYTOSOL	0.62378	0.754807	up	11	0.28949	11	0
REACTOME_CHEMOKINE_RECEPTORS_BIND_CHEMOKINES	0.63257	0.764072	up	44	0.21717	44	0
REACTOME_MEIOSIS	0.63496	0.764448	up	66	0.20696	66	0
REACTOME_SRP_DEPENDENT_COTRANSLATIONAL_PROTEIN_TARGETING_TO_MEMBRANE	0.63515	0.764448	up	68	0.20625	68	0
REACTOME_G1_S_SPECIFIC_TRANSCRIPTION	0.63772	0.764763	up	15	0.26375	15	0
REACTOME_SMOOTH_MUSCLE_CONTRACTION	0.63928	0.764763	up	22	0.24198	22	0
REACTOME_METABOLISM_OF_RNA	0.63983	0.764763	up	183	0.19036	183	0
REACTOME_NOD1_2_SIGNALING_PATHWAY	0.63995	0.764763	up	28	0.2311	28	0
REACTOME_EARLY_PHASE_OF_HIV_LIFE_CYCLE	0.64307	0.767131	up	11	0.28511	11	0
REACTOME_DARPP_32_EVENTS	0.64827	0.771938	up	21	0.24227	21	0
REACTOME_RNA_POL_III_TRANSCRIPTION_INITIATION_FROM_TYPE_2_PROMOTER	0.64939	0.771938	up	22	0.24007	22	0
REACTOME_EGFR_DOWNREGULATION	0.65293	0.77478	up	22	0.23943	22	0
REACTOME_DOUBLE_STRAND_BREAK_REPAIR	0.65588	0.776912	up	21	0.24076	21	0
REACTOME_ARMS_MEDIATED_ACTIVATION	0.65921	0.779487	up	17	0.25146	17	0
REACTOME_BETA_DEFENSINS	0.67275	0.794104	up	14	0.2609	13	1
REACTOME_RNA_POL_II_TRANSCRIPTION_PRE_INITIATION_AND_PROMOTER_OPENING	0.67817	0.795343	up	35	0.21717	35	0
REACTOME_LAGGING_STRAND_SYNTHESIS	0.67916	0.795343	up	16	0.25087	16	0
REACTOME_ACTIVATION_OF_THE_AP1_FAMILY_OF_TRANSCRIPTION_FACTORS	0.67931	0.795343	up	10	0.28467	10	0
REACTOME_CASPASE_MEDIATED_CLEAVAGE_OF_CYTOSKELETAL_PROTEINS	0.67958	0.795343	up	12	0.26937	12	0
REACTOME_METABOLISM_OF_NON_CODING_RNA	0.68178	0.795343	up	40	0.21231	40	0
REACTOME_MTORC1_MEDIATED_SIGNALLING	0.6821	0.795343	up	8	0.30368	8	0
REACTOME_DAG_AND_IP3_SIGNALING	0.68427	0.795343	up	30	0.22071	30	0
REACTOME_JNK_C_JUN_KINASES_PHOSPHORYLATION_AND_ACTIVATION_MEDIATED_BY_ACTIVATED_HUMAN_TAK1	0.68495	0.795343	up	15	0.25411	15	0
REACTOME_IRAK1_RECRUITS_IKK_COMPLEX	0.68558	0.795343	up	8	0.30273	8	0
REACTOME_NRIF_SIGNALS_CELL_DEATH_FROM_THE_NUCLEUS	0.6856	0.795343	up	13	0.26325	13	0
REACTOME_NUCLEOTIDE_EXCISION_REPAIR	0.69015	0.799246	up	41	0.21011	41	0
REACTOME_RAS_ACTIVATION_UOPN_CA2_INFUX_THROUGH_NMDA_RECEPTOR	0.69378	0.802072	up	15	0.25218	15	0
REACTOME_PLATELET_AGGREGATION_PLUG_FORMATION	0.69912	0.803971	up	32	0.21634	32	0
REACTOME_TRAF6_MEDIATED_IRF7_ACTIVATION_IN_TLR7_8_OR_9_SIGNALING	0.69996	0.803971	up	8	0.2987	8	0
REACTOME_INTERACTIONS_OF_VPR_WITH_HOST_CELLULAR_PROTEINS	0.69998	0.803971	up	30	0.2181	30	0
REACTOME_MEIOTIC_RECOMBINATION	0.7023	0.803971	up	39	0.20982	39	0
REACTOME_ACTIVATION_OF_CHAPERONES_BY_ATF6_ALPHA	0.70327	0.803971	up	10	0.27859	10	0
REACTOME_DOWNREGULATION_OF_SMAD2_3_SMAD4_TRANSCRIPTIONAL_ACTIVITY	0.70612	0.803971	up	18	0.23875	18	0
REACTOME_SEROTONIN_RECEPTORS	0.70752	0.803971	up	11	0.26984	11	0
REACTOME_TRANSPORT_OF_MATURE_MRNA_DERIVED_FROM_AN_INTRONLESS_TRANSCRIPT	0.70791	0.803971	up	30	0.2167	30	0
REACTOME_ROLE_OF_SECOND_MESSENGERS_IN_NETRIN1_SIGNALING	0.70955	0.803971	up	9	0.28554	9	0
REACTOME_NFKB_IS_ACTIVATED_AND_SIGNALS_SURVIVAL	0.70996	0.803971	up	10	0.27687	10	0
REACTOME_PACKAGING_OF_TELOMERE_ENDS	0.71075	0.803971	up	19	0.23441	19	0
REACTOME_ACTIVATION_OF_BH3_ONLY_PROTEINS	0.7108	0.803971	up	15	0.2486	15	0
REACTOME_AMINE_LIGAND_BINDING_RECEPTORS	0.71093	0.803971	up	34	0.21248	33	1
REACTOME_CTNNB1_PHOSPHORYLATION_CASCADE	0.7161	0.808461	up	14	0.25132	14	0
REACTOME_DEADENYLATION_DEPENDENT_MRNA_DECAY	0.72145	0.813139	up	34	0.21075	34	0
REACTOME_HOMOLOGOUS_RECOMBINATION_REPAIR_OF_REPLICATION_INDEPENDENT_DOUBLE_STRAND_BREAKS	0.72767	0.818781	up	16	0.24069	16	0
REACTOME_TRANSCRIPTION	0.7301	0.820104	up	146	0.18545	146	0
REACTOME_STEROID_HORMONES	0.73128	0.820104	up	27	0.2159	27	0
REACTOME_METABOLISM_OF_MRNA	0.73369	0.820595	up	146	0.18514	146	0
REACTOME_CA_DEPENDENT_EVENTS	0.73519	0.820595	up	28	0.21449	28	0
REACTOME_DOWNREGULATION_OF_ERBB2_ERBB3_SIGNALING	0.73537	0.820595	up	11	0.2631	11	0
REACTOME_PTM_GAMMA_CARBOXYLATION_HYPUSINE_FORMATION_AND_ARYLSULFATASE_ACTIVATION	0.74396	0.828808	up	23	0.21997	23	0
REACTOME_SIGNALING_BY_GPCR	0.75091	0.834263	up	575	0.17644	572	3
REACTOME_RNA_POL_I_RNA_POL_III_AND_MITOCHONDRIAL_TRANSCRIPTION	0.75149	0.834263	up	69	0.1921	69	0
REACTOME_DEGRADATION_OF_THE_EXTRACELLULAR_MATRIX	0.75257	0.834263	up	26	0.21354	26	0
REACTOME_IL_2_SIGNALING	0.75614	0.836025	up	40	0.20081	40	0
REACTOME_CYCLIN_A_B1_ASSOCIATED_EVENTS_DURING_G2_M_TRANSITION	0.75664	0.836025	up	14	0.24222	14	0
REACTOME_INHIBITION_OF_REPLICATION_INITIATION_OF_DAMAGED_DNA_BY_RB1_E2F1	0.76741	0.846537	up	11	0.25519	11	0
REACTOME_PLATELET_CALCIUM_HOMEOSTASIS	0.77253	0.848494	up	15	0.2347	15	0
REACTOME_ACTIVATION_OF_CHAPERONE_GENES_BY_ATF6_ALPHA	0.77287	0.848494	up	8	0.27856	8	0
REACTOME_KINESINS	0.77296	0.848494	up	23	0.21416	23	0
REACTOME_HORMONE_SENSITIVE_LIPASE_HSL_MEDIATED_TRIACYLGLYCEROL_HYDROLYSIS	0.78015	0.854994	up	11	0.25179	11	0
REACTOME_DEADENYLATION_OF_MRNA	0.78428	0.856996	up	13	0.2399	13	0
REACTOME_APOPTOSIS_INDUCED_DNA_FRAGMENTATION	0.78452	0.856996	up	12	0.24445	12	0
REACTOME_TRANSPORT_OF_RIBONUCLEOPROTEINS_INTO_THE_HOST_NUCLEUS	0.79563	0.866653	up	25	0.20586	25	0
REACTOME_TELOMERE_MAINTENANCE	0.79629	0.866653	up	43	0.19281	43	0
REACTOME_ADENYLATE_CYCLASE_INHIBITORY_PATHWAY	0.79894	0.866653	up	13	0.23622	13	0
REACTOME_HIV_LIFE_CYCLE	0.79921	0.866653	up	101	0.18165	101	0
REACTOME_NEP_NS2_INTERACTS_WITH_THE_CELLULAR_EXPORT_MACHINERY	0.79979	0.866653	up	25	0.20504	25	0
REACTOME_PRE_NOTCH_PROCESSING_IN_GOLGI	0.80169	0.867318	up	16	0.22352	16	0
REACTOME_LATE_PHASE_OF_HIV_LIFE_CYCLE	0.80548	0.870022	up	90	0.18183	90	0
REACTOME_CITRIC_ACID_CYCLE_TCA_CYCLE	0.80848	0.871865	up	16	0.22187	16	0
REACTOME_DIGESTION_OF_DIETARY_CARBOHYDRATE	0.82242	0.885481	dn	4	-0.30955	4	0
REACTOME_MEIOTIC_SYNAPSIS	0.83016	0.891261	up	41	0.18728	41	0
REACTOME_3_UTR_MEDIATED_TRANSLATIONAL_REGULATION	0.83122	0.891261	up	60	0.18217	60	0
REACTOME_METABOLISM_OF_STEROID_HORMONES_AND_VITAMINS_A_AND_D	0.83368	0.891261	up	32	0.19186	32	0
REACTOME_HYALURONAN_UPTAKE_AND_DEGRADATION	0.83418	0.891261	up	9	0.2508	9	0
REACTOME_G0_AND_EARLY_G1	0.8344	0.891261	up	22	0.20246	22	0
REACTOME_SIGNALLING_TO_P38_VIA_RIT_AND_RIN	0.8395	0.89529	up	15	0.218	15	0
REACTOME_BINDING_AND_ENTRY_OF_HIV_VIRION	0.84145	0.895952	up	4	0.3304	4	0
REACTOME_CREB_PHOSPHORYLATION_THROUGH_THE_ACTIVATION_OF_CAMKII	0.84765	0.901129	up	13	0.22328	13	0
REACTOME_AMINE_DERIVED_HORMONES	0.85185	0.902546	dn	14	-0.17578	14	0
REACTOME_HIGHLY_CALCIUM_PERMEABLE_POSTSYNAPTIC_NICOTINIC_ACETYLCHOLINE_RECEPTORS	0.85249	0.902546	up	10	0.23733	10	0
REACTOME_PEPTIDE_LIGAND_BINDING_RECEPTORS	0.853	0.902546	up	154	0.17321	153	1
REACTOME_APC_CDC20_MEDIATED_DEGRADATION_OF_NEK2A	0.8567	0.90504	up	18	0.2039	18	0
REACTOME_RNA_POL_I_TRANSCRIPTION_INITIATION	0.86127	0.908444	up	19	0.2004	19	0
REACTOME_CONVERSION_FROM_APC_C_CDC20_TO_APC_C_CDH1_IN_LATE_ANAPHASE	0.86495	0.9109	up	14	0.21429	14	0
REACTOME_GPCR_DOWNSTREAM_SIGNALING	0.86839	0.91243	up	478	0.16966	475	3
REACTOME_IL_RECEPTOR_SHC_SIGNALING	0.86911	0.91243	up	26	0.18815	26	0
REACTOME_APC_C_CDC20_MEDIATED_DEGRADATION_OF_CYCLIN_B	0.87123	0.913233	up	17	0.20257	17	0
REACTOME_MRNA_DECAY_BY_5_TO_3_EXORIBONUCLEASE	0.87332	0.914003	up	12	0.21981	12	0
REACTOME_PKA_MEDIATED_PHOSPHORYLATION_OF_CREB	0.8759	0.914292	up	17	0.20119	17	0
REACTOME_PRESYNAPTIC_NICOTINIC_ACETYLCHOLINE_RECEPTORS	0.87631	0.914292	up	12	0.21879	12	0
REACTOME_CREATION_OF_C4_AND_C2_ACTIVATORS	0.88089	0.91765	up	8	0.24444	8	0
REACTOME_MUSCLE_CONTRACTION	0.88369	0.919147	up	45	0.1753	45	0
REACTOME_SYNTHESIS_OF_PIPS_AT_THE_LATE_ENDOSOME_MEMBRANE	0.88532	0.919423	up	10	0.22617	10	0
REACTOME_ENDOGENOUS_STEROLS	0.89518	0.928233	up	14	0.20464	14	0
REACTOME_CHROMOSOME_MAINTENANCE	0.89702	0.928712	up	84	0.16866	84	0
REACTOME_RNA_POL_I_TRANSCRIPTION_TERMINATION	0.90071	0.931102	up	16	0.196	16	0
REACTOME_GAMMA_CARBOXYLATION_TRANSPORT_AND_AMINO_TERMINAL_CLEAVAGE_OF_PROTEINS	0.90377	0.932835	up	9	0.22677	9	0
REACTOME_INFLUENZA_LIFE_CYCLE	0.9062	0.933913	up	93	0.16657	93	0
REACTOME_ANDROGEN_BIOSYNTHESIS	0.92854	0.954707	up	9	0.21655	9	0
REACTOME_ADENYLATE_CYCLASE_ACTIVATING_PATHWAY	0.92921	0.954707	up	10	0.20893	10	0
REACTOME_INFLUENZA_VIRAL_RNA_TRANSCRIPTION_AND_REPLICATION	0.93414	0.957111	up	61	0.1604	61	0
REACTOME_DEPOSITION_OF_NEW_CENPA_CONTAINING_NUCLEOSOMES_AT_THE_CENTROMERE	0.93439	0.957111	up	32	0.16509	32	0
REACTOME_REGULATION_OF_IFNA_SIGNALING	0.93739	0.957346	dn	18	-0.14237	17	1
REACTOME_RNA_POL_I_TRANSCRIPTION	0.93746	0.957346	up	37	0.16196	37	0
REACTOME_GLUCOSE_TRANSPORT	0.94752	0.964787	up	36	0.15849	36	0
REACTOME_REGULATION_OF_GLUCOKINASE_BY_GLUCOKINASE_REGULATORY_PROTEIN	0.94761	0.964787	up	25	0.16393	25	0
REACTOME_HORMONE_LIGAND_BINDING_RECEPTORS	0.94992	0.96568	up	9	0.20576	9	0
REACTOME_POTASSIUM_CHANNELS	0.95648	0.970885	up	92	0.15379	92	0
REACTOME_RETROGRADE_NEUROTROPHIN_SIGNALLING	0.97274	0.985905	up	10	0.18498	10	0
REACTOME_INTERACTION_BETWEEN_L1_AND_ANKYRINS	0.97965	0.991418	up	21	0.15	21	0
REACTOME_ORGANIC_CATION_ANION_ZWITTERION_TRANSPORT	0.98424	0.994271	up	13	0.16187	13	0
REACTOME_RNA_POL_I_PROMOTER_OPENING	0.98542	0.994271	up	17	0.15037	17	0
REACTOME_IONOTROPIC_ACTIVITY_OF_KAINATE_RECEPTORS	0.98854	0.995928	up	10	0.16851	10	0
REACTOME_STRIATED_MUSCLE_CONTRACTION	0.99055	0.996464	up	27	0.13271	27	0
REACTOME_G_ALPHA_S_SIGNALLING_EVENTS	0.99292	0.996978	up	113	0.13505	111	2
REACTOME_VOLTAGE_GATED_POTASSIUM_CHANNELS	0.99402	0.996978	dn	41	-0.088817	41	0
REACTOME_MRNA_PROCESSING	1	1	dn	141	-0.1999	141	0
REACTOME_PROCESSING_OF_CAPPED_INTRON_CONTAINING_PRE_MRNA	1	1	dn	125	-0.22766	125	0
