# Supplementary material for: Integrative Pharmacogenomics Analysis of Patient-Derived Xenografts
Source: Oxford University Press journal article supplement (doi:10.1158/0008-5472.can-19-0349), 2019-05-29
Supplement: 00085472can190349-sup-216275_3_supp_5522718_prss63.xlsx [file 00085472can190349-sup-216275_3_supp_5522718_prss63.xlsx]

## Sheet: sheet1
gene.names	All tissue	Breast	Lung	Pancreas	Skin	Ovary	Kidney	Oesophagus	LI	Soft tissue
TSPAN6	0.91733	0.889657	0.911682	0.452816	0.964948	0.809841	0.759017	0.129314	0.93175	0.846261
TNMD	0.587163	0.250913	0.657053	0.112026	0.211843	0.623637	0.384831	0.0544347	0.414958	0.786399
DPM1	0.584573	0.400307	0.704846	0.262537	0.641728	0.596228	0.6718	0.405054	0.673618	0.507343
SCYL3	0.574588	0.534729	0.410865	0.510105	0.597306	0.542448	0.649561	0.571009	0.286053	0.824392
C1orf112	0.502797	0.571523	0.498499	0.242379	0.494215	0.485386	0.600719	0.530125	0.349825	0.7144
FGR	0.343831	0.143612	0.631153	0.142338	0.0291208	0.150417	0.638738	-0.080201	0.36046	0.160556
CFH	0.719262	0.679572	0.676809	0.718423	0.5672	0.358772	0.671048	0.307367	0.759628	0.600795
FUCA2	0.772352	0.625105	0.76296	0.712801	0.666914	0.765773	0.644989	0.94438	0.748981	0.780296
GCLC	0.736351	0.600551	0.860411	0.664009	0.728207	0.37042	0.595466	0.797484	0.531283	0.672346
NFYA	0.602164	0.653568	0.549892	0.590331	0.848441	0.607718	0.450957	0.540153	0.268664	0.522752
STPG1	0.438031	0.402719	0.570443	0.314939	0.571561	0.36834	0.562579	0.295649	0.288519	0.47812
NIPAL3	0.683922	0.725676	0.736375	0.48454	0.709377	0.655608	0.851914	0.663004	0.398695	0.605995
LAS1L	0.44373	0.438764	0.307008	0.237487	0.569407	0.550997	0.413347	0.391946	0.414935	0.438765
ENPP4	0.789865	0.697625	0.596345	0.75561	0.713715	0.681954	0.862256	0.955846	0.67326	0.829418
SEMA3F	0.593215	0.431255	0.600847	0.705772	0.268078	0.364159	0.596841	0.602362	0.510169	0.608926
CFTR	0.675059	0.112045	0.433289	0.218611	0.0351625	0.0201466	0.0916695	0.840401	0.606463	0.143794
ANKIB1	0.576303	0.684536	0.605873	0.453923	0.693549	0.796725	0.644835	0.796351	0.320405	0.880958
KRIT1	0.493554	0.53996	0.321266	0.412408	0.595305	0.572718	0.596474	0.756304	0.273686	0.700957
RAD52	0.354075	0.348248	0.155695	0.347732	0.214141	0.505024	0.258499	-0.0215351	0.327961	0.558434
MYH16	0.161952	0.110525	0.0757062	0.0334707	0.108296	0.108523	0.23194	-0.13736	0.318223	0.156936
BAD	0.498152	0.688003	0.332195	0.373507	0.606797	0.54905	0.682864	0.836535	0.316125	0.431795
LAP3	0.513911	0.577621	0.533496	0.434481	0.69551	0.697409	0.405832	0.199419	0.546307	0.622252
CD99	0.803414	0.918704	0.615102	0.625123	0.969357	0.837308	0.477686	0.664677	0.391807	0.632537
HS3ST1	0.700671	0.361711	0.597736	0.547693	0.595644	0.274578	0.686429	0.63054	0.508635	0.738271
AOC1	0.841806	0.651676	0.534824	0.624943	0.103101	0.690229	0.623612	0.978686	0.777397	0.490057
WNT16	0.725329	0.873177	0.80102	0.0823652	0.890149	0.298202	0.28065	0.793571	0.455217	0.335098
HECW1	0.234912	0.188956	0.134521	0.142841	0.329797	0.0985707	0.299485	0.156495	0.00487802	0.399338
MAD1L1	0.556833	0.482039	0.346037	0.552385	0.740694	0.481518	0.618175	0.616079	0.244596	0.712064
LASP1	0.571046	0.512999	0.382635	0.49112	0.483385	0.78839	0.379877	0.760254	0.509393	0.532201
SNX11	0.502561	0.31596	0.454524	0.307512	0.587799	0.633389	0.706253	0.342666	0.450046	0.57039
TMEM176A	0.753	0.626816	0.596832	0.478276	0.320986	0.485664	0.934892	0.970636	0.758272	0.848806
M6PR	0.49787	0.505775	0.556246	0.449837	0.848401	0.520857	0.347998	0.693682	0.324999	0.520619
KLHL13	0.723168	0.635553	0.656263	0.644004	0.812733	0.740154	0.684496	0.994048	0.688087	0.720609
CYP26B1	0.601566	0.616103	0.51206	0.241788	0.764198	0.660387	0.556937	0.441905	0.0795659	0.742132
ICA1	0.816984	0.759212	0.68022	0.630352	0.540418	0.632632	0.760249	0.769741	0.603007	0.527446
DBNDD1	0.558998	0.572961	0.589921	0.393739	0.521132	0.400096	0.714661	0.349755	0.318614	0.464133
ALS2	0.435277	0.47418	0.244016	0.39343	0.595571	0.321808	0.384016	0.776458	0.452074	0.454394
CASP10	0.555306	0.187788	0.556882	0.41485	0.305761	0.755645	0.387385	0.506908	0.13951	0.32808
CFLAR	0.625179	0.681979	0.552486	0.459788	0.609113	0.64447	0.778414	0.292371	0.18211	0.609606
TFPI	0.756051	0.797774	0.639094	0.650781	0.749745	0.356371	0.704562	0.978461	0.625668	0.863012
NDUFAF7	0.372184	0.320975	0.302004	0.571883	0.468957	0.493962	0.294378	0.338166	0.202386	0.40783
RBM5	0.361517	0.182328	0.317059	0.367199	0.11202	0.638339	0.347426	-0.030403	0.143481	0.501094
MTMR7	0.286024	0.439016	0.568684	0.201755	0.623434	0.018741	-0.0342379	-0.0112762	-0.0518689	0.00617741
SLC7A2	0.686488	0.816828	0.815086	0.477174	0.803854	0.324347	0.611954	0.25042	0.306491	0.812296
ARF5	0.471886	0.548043	0.337228	0.269538	0.623208	0.684461	0.319554	0.444361	0.341679	0.640192
SARM1	0.513317	0.566617	0.494237	0.414119	0.582814	0.665164	0.641652	0.29802	0.268738	0.362048
POLDIP2	0.6332	0.687217	0.695285	0.530857	0.640675	0.610404	0.721064	0.747499	0.363974	0.678372
PLXND1	0.652534	0.534425	0.691803	0.564316	0.793088	0.559472	0.834472	0.522026	0.33642	0.387726
AK2	0.657467	0.674837	0.623448	0.485998	0.738237	0.641716	0.521072	0.582339	0.608191	0.719346
CD38	0.396536	0.0475286	0.447563	0.010941	0.12696	0.322573	0.531477	0.777991	0.317153	0.0655252
FKBP4	0.511863	0.508807	0.344039	0.473376	0.335049	0.558165	0.502976	0.473971	0.572161	0.276308
KDM1A	0.731225	0.771529	0.711305	0.676753	0.667638	0.597749	0.780948	0.838775	0.485668	0.729226
RBM6	0.393653	0.174496	0.487651	0.348883	0.111828	0.627841	0.560258	0.13492	0.175849	0.479294
CAMKK1	0.188483	0.357445	0.0895942	0.0211367	0.0770248	0.336937	0.0713063	0.320948	0.04826	0.494513
RECQL	0.603456	0.652071	0.565906	0.592692	0.750053	0.633542	0.798079	0.764933	0.173801	0.698904
CCDC132	0.467165	0.509207	0.342842	0.258712	0.667573	0.470021	0.304412	0.896352	0.279272	0.663381
HSPB6	0.291632	-0.0128336	0.268351	0.213114	0.450182	0.634243	0.516681	0.291781	0.186323	0.336692
ARHGAP33	0.21619	0.255496	0.188154	0.129635	0.240448	0.284194	0.434817	0.492907	0.116785	0.141861
NDUFAB1	0.62118	0.346951	0.631706	0.57367	0.520901	0.854615	0.557267	0.58096	0.769632	0.71952
PDK4	0.626534	0.662874	0.383773	0.453946	0.773065	0.646293	0.600958	0.917508	0.573305	0.682206
SLC22A16	0.484229	0.627289	0.155842	-0.00938704	0.233566	0.383074	0.37703	0.042097	0.195465	0.80046
ZMYND10	0.285372	0.517014	0.202771	0.211487	0.43362	0.550722	0.318095	0.216085	0.00476506	0.183294
ABCB5	0.85565	0.083804	0.0473449	0.153642	0.845647	0.214788	0.0431441	0.672644	0.0431634	0.943567
ARX	0.60284	0.282008	0.70304	0.714914	0.872446	0.0524255	0.688222	0.371184	0.686838	0.749709
SLC25A13	0.637843	0.613304	0.491406	0.464033	0.822848	0.815106	0.60997	0.505378	0.429716	0.749828
ST7	0.553906	0.398076	0.63156	0.404298	0.709429	0.706164	0.417054	0.671876	0.366384	0.790994
CDC27	0.540085	0.578683	0.553851	0.29691	0.404073	0.693287	0.497187	0.514421	0.342561	0.803474
SLC4A1	0.268452	0.24103	0.119481	0.248217	0.393061	0.500836	0.20546	0.417579	0.144341	0.166115
CALCR	0.506008	0.0704299	0.412039	0.268291	0.353401	0.23663	0.825425	0.0759969	0.158808	0.418673
HCCS	0.609467	0.530735	0.612277	0.429751	0.493475	0.834698	0.525246	0.386556	0.496743	0.822054
DVL2	0.634176	0.580141	0.525524	0.297111	0.435617	0.585604	0.71561	0.72928	0.272885	0.771001
PRSS22	0.384505	0.273473	0.426	0.159467	0.150164	0.541319	0.686487	0.86055	0.226557	0.146714
UPF1	0.386085	0.243965	0.439267	0.24426	0.480922	0.479489	0.554721	0.333349	0.122749	0.514851
SKAP2	0.819161	0.684615	0.583571	0.897333	0.83477	0.930471	0.478833	0.667316	0.639752	0.966754
SLC25A5	0.593028	0.274802	0.451069	0.315166	0.302024	0.501631	0.600663	0.482731	0.388513	0.648115
CCDC109B	0.687574	0.613522	0.454046	0.614823	0.775852	0.826929	0.810153	0.62383	0.624556	0.860504
HOXA11	0.739566	0.464487	0.496206	0.635945	0.700489	0.766449	0.751031	0.492278	0.652022	0.748539
POLR2J	0.549741	0.581706	0.555808	0.627021	0.696592	0.706272	0.617004	0.511453	0.302246	0.79482
MEOX1	0.67478	0.439407	0.391512	0.647742	0.409104	0.714523	0.231543	0.752668	0.229952	0.787031
THSD7A	0.6721	0.182871	0.584285	0.539919	0.689725	0.747426	0.502468	0.0696007	0.0031402	0.75097
LIG3	0.565883	0.547338	0.658272	0.295975	0.592326	0.715803	0.357905	0.141453	0.431854	0.770436
RPAP3	0.379659	0.4282	0.309306	0.318491	0.680584	0.629473	0.201677	0.732883	0.120643	0.654079
ACSM3	0.711103	0.640076	0.617347	0.56509	0.393246	0.464371	0.814033	0.93815	0.681472	0.790015
CIAPIN1	0.576057	0.56044	0.636862	0.515651	0.540483	0.706543	0.761086	0.0519587	0.464599	0.589386
SPPL2B	0.469166	0.445941	0.24002	0.507679	0.486902	0.573662	0.280086	0.498241	0.348686	0.46099
FAM214B	0.475688	0.309736	0.462874	0.286294	0.605691	0.43773	0.386781	0.202014	0.543415	0.632472
COPZ2	0.558095	0.541285	0.342057	0.170025	0.477381	0.710429	0.542306	0.749055	0.0627352	0.76044
PRKAR2B	0.813861	0.786747	0.702132	0.685054	0.836958	0.582165	0.713502	0.952329	0.500017	0.803431
MSL3	0.503855	0.599516	0.1778	0.566615	0.53621	0.564199	0.666946	0.44274	0.305406	0.662919
CREBBP	0.503595	0.537748	0.46951	0.485057	0.465531	0.741812	0.513281	0.295884	0.222631	0.591945
BZRAP1	0.573521	0.590921	0.393288	0.27427	0.345727	0.449524	0.518465	0.360144	0.638951	0.794028
MPO	0.174592	0.109647	0.0302552	0.147003	0.153387	0.0773893	0.038231	0.237556	0.0432481	0.645783
PON1	0.626684	0.117565	0.445271	0.168202	0.180778	0.643387	0.120864	0.0769994	0.607546	0.69986
GCFC2	0.461012	0.476208	0.409215	0.443258	0.394174	0.651096	0.499185	0.521283	0.159666	0.348417
WDR54	0.699241	0.786018	0.725872	0.589576	0.56974	0.575467	0.507668	0.639096	0.510516	0.729441
CROT	0.547699	0.577994	0.574208	0.36938	0.594031	0.606429	0.677311	0.744473	0.342171	0.73272
ABCB4	0.693145	0.442692	0.535689	0.174247	0.878562	0.621892	0.7577	0.458011	0.202984	0.658355
KMT2E	0.527878	0.509474	0.467446	0.432781	0.440588	0.681968	0.662905	0.409473	0.284645	0.741829
RHBDD2	0.537804	0.659664	0.375622	0.274066	0.729218	0.722567	0.876961	0.550068	0.232772	0.797001
SOX8	0.717234	0.697493	0.324258	0.687621	0.661915	0.563029	0.067681	0.83299	0.378125	0.770511
IBTK	0.637514	0.587559	0.608086	0.682631	0.709849	0.639307	0.543273	0.557481	0.410635	0.707599
ZNF195	0.457661	0.295979	0.463988	0.625517	0.537136	0.469178	0.291796	0.508889	0.192336	0.360171
MYCBP2	0.592253	0.605637	0.745986	0.239057	0.613661	0.6516	0.577589	0.701544	0.325284	0.732823
FBXL3	0.5773	0.674297	0.574296	0.634333	0.511341	0.618534	0.457468	0.824962	0.470478	0.375015
ITGAL	0.590789	0.172778	0.611454	0.196376	0.35828	0.30008	0.96577	-0.0401201	0.467559	0.291427
PDK2	0.441529	0.569513	0.301175	0.339564	0.724854	0.750181	0.736706	0.378789	0.24063	0.572091
ITGA3	0.650731	0.405611	0.599217	0.410558	0.464327	0.656404	0.593053	0.685446	0.311339	0.508316
ZFX	0.502486	0.54523	0.358134	0.378882	0.618607	0.623917	0.400356	0.435159	0.265708	0.560943
LAMP2	0.628682	0.351113	0.635665	0.550195	0.619613	0.599999	0.830817	0.573036	0.642503	0.688552
ITGA2B	0.19432	0.243382	0.17315	0.143377	0.298163	0.174638	0.285899	0.198423	0.0674265	0.153981
ASB4	0.581226	0.0325096	0.822475	0.640289	0.408342	0.00445482	0.27582	0.331295	0.48502	0.145759
GDE1	0.64409	0.591373	0.700085	0.600873	0.713417	0.603509	0.529226	0.781267	0.454727	0.589183
C19orf60	0.558579	0.433373	0.638529	0.49655	0.6671	0.786949	0.361073	0.354996	0.348661	0.605064
CRLF1	0.61735	0.740617	0.61945	0.266804	0.300167	0.502307	0.582403	0.842513	-0.00674569	0.769683
OSBPL7	0.443266	0.317667	0.163843	0.409945	0.375024	0.588061	0.262847	0.703588	0.221078	0.277437
TMEM98	0.720798	0.65573	0.603561	0.442096	0.936166	0.88739	0.877496	0.822791	0.592504	0.674809
YBX2	0.307801	0.634115	0.180118	0.0152734	-0.0727105	0.243031	0.0772851	-0.00290435	0.35285	0.38929
MAP3K14	0.493219	0.268614	0.472093	0.298817	0.466909	0.260721	0.714232	0.120286	0.356153	0.571909
ABCC8	0.179947	0.36461	0.0817791	0.102344	0.0348941	0.709542	0.0290955	0.12657	0.0848775	0.379297
CACNG3	0.204729	0.103364	0.17007	0.158995	0.234209	0.0315542	0.363958	0.124556	0.222202	-0.0257795
TMEM132A	0.244937	0.271925	0.0866927	0.235078	0.122208	0.69639	0.234043	0.432854	0.0281337	0.280672
TAC1	0.672879	0.693642	0.927343	0.448348	0.81751	0.576113	0.57002	-0.117748	0.476639	0.983059
ZNF263	0.513242	0.549477	0.471131	0.528389	0.698849	0.532748	0.73864	0.340635	0.392852	0.495245
CX3CL1	0.671217	0.653368	0.781712	0.710927	0.690482	0.404288	0.692293	0.558945	0.239642	0.646918
SPATA20	0.669261	0.727369	0.638581	0.557794	0.799525	0.574548	0.779792	0.532962	0.324002	0.742853
CACNA1G	0.360458	0.236457	0.0699599	0.0785069	0.128312	0.468775	0.350413	0.320467	0.0948377	0.616641
TNFRSF12A	0.764573	0.620801	0.786206	0.441902	0.737884	0.838737	0.924273	0.295183	0.4025	0.930234
DLX6	0.754783	0.626952	0.614187	0.667784	0.816093	0.889655	0.544971	0.950196	0.530582	0.687025
MAP3K9	0.588501	0.308484	0.498985	0.399872	0.48013	0.43236	0.546598	0.632483	0.412741	0.263128
RALA	0.617641	0.62412	0.488896	0.47088	0.783278	0.78196	0.878758	0.638441	0.494713	0.811598
BAIAP2L1	0.879795	0.60313	0.708993	0.609674	0.785847	0.625234	0.797416	0.568721	0.470586	0.670775
KDM7A	0.569515	0.339108	0.517252	0.497602	0.316241	0.226059	0.540032	0.531346	0.36618	0.653406
ETV1	0.715091	0.622069	0.686351	0.248107	0.76159	0.814296	0.592647	0.569074	0.405626	0.651085
AGK	0.606528	0.575481	0.386335	0.474859	0.78816	0.493106	0.610213	0.867289	0.478899	0.736083
ALDH3B1	0.597229	0.335767	0.537691	0.423731	0.375481	0.555606	0.72799	0.783615	0.191023	0.447569
TTC22	0.609935	0.447886	0.577464	0.445404	0.19763	0.469688	0.554489	0.583425	0.320874	0.0542781
PHTF2	0.590162	0.659553	0.479994	0.427721	0.554056	0.649649	0.476012	0.717925	0.170236	0.372764
CCL26	0.536953	0.0925682	0.547062	0.300554	0.0859658	0.766361	0.165217	0.42441	0.474769	0.906376
FARP2	0.659097	0.478602	0.189496	0.465508	0.816011	0.430508	0.725242	0.609247	0.375887	0.730693
USH1C	0.902984	0.513637	0.711788	0.887079	0.2397	0.680188	0.964369	0.873314	0.722023	0.529904
GGCT	0.746518	0.777655	0.745403	0.399608	0.420803	0.689872	0.83987	0.614435	0.645568	0.550207
DBF4	0.476278	0.362933	0.498444	0.306891	0.530696	0.756071	0.335261	0.478112	0.211106	0.765219
TBXA2R	0.523859	0.591356	0.284889	0.0854029	0.530103	0.328073	0.531399	0.197318	0.205249	0.476908
IFRD1	0.593316	0.713107	0.593338	0.350112	0.743228	0.741984	0.601493	0.470332	0.396167	0.758714
LGALS14	0.258058	0.0676738	0.714479	-0.0142429	-0.0261501	0.190886	0.44951	0.0409306	0.222694	0.125016
COX10	0.467231	0.44237	0.28362	0.613357	0.424933	0.245779	0.788675	-0.0512208	0.55416	0.462428
GTF2IRD1	0.765925	0.550395	0.693184	0.601772	0.627821	0.682557	0.776699	0.589926	0.800516	0.68433
PAF1	0.570158	0.61131	0.569796	0.494024	0.389958	0.500598	0.48175	0.476267	0.350316	0.734489
VPS41	0.514364	0.478697	0.432111	0.304279	0.612306	0.211684	0.820245	0.817658	0.327142	0.731227
ARHGAP44	0.599628	0.5873	0.450558	0.549078	0.252449	0.495549	0.667828	0.759704	0.479918	0.691927
ELAC2	0.489303	0.529642	0.50978	0.428429	0.0837202	0.50978	0.650664	0.872522	0.54104	0.507899
SCIN	0.684701	0.447279	0.721474	0.75347	0.855425	0.183637	0.646474	0.765741	0.723984	0.624523
ARSD	0.792476	0.566623	0.800955	0.670538	0.850163	0.68107	0.918852	0.69372	0.625682	0.70275
PNPLA4	0.75927	0.752091	0.774437	0.532389	0.894955	0.701442	0.632682	0.746151	0.689034	0.785819
MYH13	0.113454	0.144793	0.00522408	0.274761	-0.0338013	0.0339649	0.548076	-0.018151	0.0372271	0.252981
ADIPOR2	0.688563	0.503658	0.627939	0.702256	0.649585	0.578309	0.496978	0.700329	0.613432	0.696629
UPP2	0.0458286	-0.0213529	0.0291501	0.0838781	-0.0387148	0.0385544	0.0426895	0.22427	-0.00640589	0.0104218
PRSS21	0.716852	0.653217	0.825102	0.727184	0.669447	0.799943	0.102928	0.533299	0.627479	0.625852
MARK4	0.444998	0.467188	0.564453	0.228518	0.443944	0.556269	0.300413	0.565046	0.150421	0.578472
PROM1	0.79269	0.872534	0.630946	0.740871	0.793442	0.334951	0.146623	0.986606	0.797764	0.910257
CCDC124	0.491124	0.492751	0.391431	0.461073	0.708536	0.752625	0.766532	0.520683	0.28183	0.567486
PAFAH1B1	0.601956	0.369337	0.496557	0.526745	0.696328	0.83216	0.721926	0.72451	0.552097	0.838084
NOS2	0.215876	-0.0495242	0.0456315	0.0636815	0.0969355	0.00283951	0.164034	-0.0754883	0.419079	-0.0644223
DNAH9	0.627691	0.274505	0.234248	0.0967964	0.774288	0.444716	0.265763	0.363072	-0.00330886	0.820596
KIAA0100	0.454118	0.369378	0.458847	0.25258	0.459564	0.757799	0.688718	0.749234	0.276079	0.491582
SLC13A2	0.440778	0.649972	0.208148	0.518969	0.199671	0.357633	0.119066	0.660729	0.301669	0.0757701
GAS7	0.779835	0.57429	0.65389	0.071528	0.898864	0.64127	0.819456	0.499899	0.296709	0.646141
TRAPPC6A	0.613948	0.604185	0.520094	0.712735	0.618467	0.557483	0.650143	0.271575	0.439067	0.482649
MATK	0.174968	0.220868	0.0549102	0.262898	-0.00511861	0.113179	0.0891141	0.11681	0.115018	0.578207
CEACAM7	0.569765	0.467398	0.518951	0.473171	0.107189	0.609522	0.291529	0.437209	0.429785	0.183656
CD79B	0.172989	0.14417	0.0607492	0.231991	0.0453338	0.0768083	0.354527	0.222239	0.138506	0.0161948
SCN4A	0.129209	0.0795576	0.181117	0.00413341	-0.0142806	0.0632869	0.020145	-0.0011276	0.0376054	0.400558
ST7L	0.469608	0.410723	0.624045	0.346033	0.704641	0.398074	0.308693	0.702823	0.341589	0.265063
TKTL1	0.577263	0.251862	0.273432	0.0467481	0.746429	0.643684	0.111523	0.904977	0.828216	0.491957
PAX6	0.786388	0.777174	0.739389	0.732698	0.647937	0.756443	0.733741	0.861557	0.768355	0.851994
RPUSD1	0.285839	0.270423	0.189875	0.162512	0.384187	0.433348	0.262813	0.487555	0.148042	0.447436
RHBDF1	0.46738	0.391765	0.378383	0.330339	0.314413	0.468187	0.749703	0.211662	0.240926	0.695229
LUC7L	0.441011	0.268507	0.544012	0.263047	0.567869	0.670846	0.323298	0.395947	0.202151	0.616163
CACNA2D2	0.603104	0.539913	0.47059	0.0450646	0.422665	0.818193	0.174204	-0.0150888	0.331229	0.715031
BAIAP3	0.268422	0.296554	0.123975	0.210486	0.319967	0.199775	0.486979	0.533091	0.111503	0.448432
TSR3	0.487144	0.614495	0.482624	0.38029	0.602148	0.708607	0.449069	0.253851	0.331233	0.50952
PIGQ	0.292795	0.333401	0.247334	0.222987	0.128516	0.23628	0.275418	0.154963	0.225485	0.640278
TEAD3	0.533399	0.374173	0.662649	0.374797	0.247796	0.480261	0.609915	0.371165	0.399984	0.586088
SELE	0.343382	0.593994	0.294904	0.577722	0.0408505	0.303055	0.0168841	-0.0987092	0.131634	0.787986
DNAJC11	0.525442	0.482945	0.481547	0.385402	0.613551	0.462076	0.734991	0.163062	0.443292	0.692846
FMO3	0.837687	0.0391409	0.736156	0.963215	-0.0799729	0.979872	0.110886	0.302289	0.981412	0.756959
MYLIP	0.618222	0.792711	0.683824	0.451319	0.668041	0.379331	0.626732	0.510227	0.596485	0.452538
NOX1	0.828177	0.137257	0.304945	0.297155	0.201196	0.23576	-0.0565693	0.386698	0.700689	0.404994
E2F2	0.344915	0.477477	0.273174	0.274769	0.243288	0.252269	0.215731	0.21791	0.213212	0.189163
PSMB1	0.719314	0.711026	0.574372	0.795347	0.639669	0.863555	0.746451	0.802992	0.609018	0.583989
SYN1	0.170889	0.133698	0.10818	0.257357	0.103837	0.253952	0.361972	0.618828	0.0428892	0.120802
JARID2	0.71221	0.575989	0.777033	0.601222	0.529852	0.714361	0.728816	0.783146	0.601285	0.752792
CDKL5	0.608632	0.670864	0.4247	0.529607	0.707539	0.414392	0.701133	0.929876	0.435843	0.733369
CAMK1G	0.320988	0.119195	0.0918186	0.118387	0.81722	0.422978	0.202547	0.10124	0.0765814	0.498072
NADK	0.617786	0.523932	0.65919	0.564443	0.752285	0.501128	0.827363	0.459701	0.394844	0.614846
TFAP2B	0.533581	0.552263	0.625793	0.220306	0.423072	0.42693	0.0130603	0.764762	0.031033	0.79291
TFAP2D	0.19063	0.323326	0.250254	0.182954	0.0286879	0.117871	-0.000743143	0.0251602	-0.0226682	0.103577
DLEC1	0.20294	0.199884	0.0619435	0.20224	0.196992	0.543138	0.32642	0.471955	0.0770131	0.236058
CYTH3	0.633246	0.594148	0.639007	0.331669	0.662194	0.335454	0.684599	0.752944	0.303619	0.377622
ADAM22	0.533261	0.157474	0.362507	0.331805	0.515092	0.736759	0.75346	0.442171	0.337603	0.407328
SYPL1	0.623088	0.542271	0.539112	0.378444	0.61313	0.636904	0.61797	0.386742	0.290925	0.680549
CYB561	0.815968	0.719965	0.726604	0.412686	0.623376	0.729472	0.526236	0.550122	0.49943	0.863327
SPAG9	0.606342	0.528844	0.558416	0.489525	0.442321	0.768101	0.663922	0.28222	0.427094	0.680817
CELSR3	0.674364	0.737317	0.728463	0.593486	0.678551	0.573674	0.450379	0.397377	0.493594	0.70739
AASS	0.731787	0.192716	0.621159	0.482846	0.766156	0.796236	0.753133	0.22373	0.666568	0.78027
PLEKHG6	0.680501	0.581519	0.372704	0.413869	-0.0160887	0.346172	0.554148	0.537194	0.629525	0.352732
SS18L2	0.532262	0.465531	0.452033	0.513708	0.577504	0.509435	0.459902	0.265234	0.356924	0.483671
MPND	0.495923	0.484466	0.41829	0.43421	0.579813	0.635456	0.586266	-0.0267067	0.343905	0.336592
MGST1	0.789422	0.934573	0.938821	0.708556	0.734252	0.462024	0.859956	0.212429	0.789349	0.69014
CRY1	0.655093	0.63288	0.472464	0.374231	0.575052	0.47835	0.604717	0.112305	0.152348	0.651809
PGLYRP1	0.0632414	0.0856708	0.0325414	-0.0269178	-0.0147989	0.519767	-0.0999363	-0.0960495	0.127277	0.116111
NFIX	0.489699	0.639146	0.295294	0.0674243	0.221344	0.691235	0.263379	0.770234	0.247953	0.566505
ST3GAL1	0.684765	0.578499	0.510473	0.816512	0.453338	0.490383	0.587354	0.975903	0.536095	0.75998
MMP25	0.152671	0.134548	0.0504773	0.174527	0.285991	0.0224064	-0.00698427	0.431007	0.0499683	0.0221297
IL32	0.591201	0.568211	0.610557	0.420308	0.039703	0.162193	0.76151	0.59857	0.362482	0.432481
PKD1	0.228216	0.191206	0.0934362	0.307676	0.624912	0.335499	0.348073	0.346529	0.0790392	0.37498
MAPK8IP2	0.193351	0.277378	0.0975765	0.0632849	0.355097	0.381223	0.132393	0.383619	0.106437	0.397265
MED24	0.511585	0.406261	0.539953	0.420491	0.619215	0.586941	0.600494	0.741002	0.356857	0.660082
RHOBTB2	0.514895	0.226364	0.344899	0.617743	0.563964	0.431881	0.409943	0.224652	0.465524	0.454147
HEATR5B	0.451883	0.497592	0.352863	0.595343	0.345421	0.601242	0.415169	0.411439	0.239328	0.684849
SEC62	0.652936	0.75717	0.609683	0.597035	0.363244	0.58248	0.816555	0.47729	0.398955	0.703864
RPS20	0.532157	0.384312	0.415112	0.450134	0.453109	0.597709	0.553222	0.745522	0.435996	0.531783
CSDE1	0.527568	0.479437	0.59127	0.485912	0.738811	0.812548	0.606896	0.724656	0.297401	0.824861
UBE3C	0.475502	0.508913	0.45335	0.574488	0.534514	0.351921	0.48657	0.845982	0.132254	0.607574
REV3L	0.514012	0.596005	0.61579	0.296579	0.448877	0.743016	0.452198	0.58852	0.134959	0.761061
TENM1	0.498669	0.529728	0.441754	0.282938	0.614623	0.534672	0.623092	0.255761	0.353609	0.380001
PAX7	0.603689	0.234698	0.737175	0.63568	0.116442	0.834986	-0.112326	0.629845	0.309619	0.298716
MASP2	0.101456	0.102748	0.0509583	-0.0222031	0.162024	0.168587	0.295327	0.0162234	0.0271697	0.143297
IYD	0.784794	0.88179	0.275989	0.608266	0.229189	0.854524	0.470828	0.979026	0.552254	0.956863
FAM76A	0.376555	0.198993	0.153634	0.40228	0.166048	0.393336	0.487437	0.316421	0.26122	0.501718
TRAF3IP3	0.742035	0.657646	0.746039	0.0853392	0.564591	0.31645	0.94054	0.956985	0.745643	0.748681
POMT2	0.353365	0.431042	0.384028	0.197531	0.379353	0.530736	0.200059	0.231914	0.09685	0.339678
VTA1	0.583276	0.670091	0.638971	0.58775	0.58193	0.721665	0.432166	0.240165	0.404823	0.761597
MLXIPL	0.419359	0.0511418	0.0975153	0.245927	0.289259	0.112529	0.622973	0.594773	0.279094	0.0892331
BAZ1B	0.47329	0.38469	0.436048	0.53446	0.476991	0.433381	0.419264	0.0922084	0.32184	0.636386
RANBP9	0.53908	0.563545	0.616669	0.522881	0.425565	0.696424	0.486965	0.65815	0.302248	0.64981
ETV7	0.575871	0.543456	0.433316	0.595729	0.251212	0.50543	0.499143	0.632513	0.654036	0.441416
SPRTN	0.274256	0.52457	0.139326	0.292875	0.506378	0.669906	0.479207	0.706445	0.0181646	0.452056
METTL13	0.614046	0.744544	0.549505	0.522735	0.509046	0.605207	0.672364	0.390507	0.297808	0.849631
ZNF207	0.291749	0.314767	0.172258	0.23156	0.19329	0.741896	0.282457	-0.0823517	0.120851	0.418505
UQCRC1	0.625845	0.6592	0.381284	0.489028	0.769852	0.936349	0.704454	0.790493	0.371945	0.576293
STARD3NL	0.820878	0.922288	0.853056	0.577667	0.615778	0.44832	0.8932	0.723457	0.192502	0.687504
CD9	0.780195	0.295084	0.495403	0.608621	0.9175	0.784708	0.703261	0.188486	0.995801	0.832059
NCAPD2	0.512658	0.470756	0.499658	0.45082	0.483716	0.577294	0.642358	0.267866	0.379214	0.578712
IFFO1	0.86038	0.812536	0.548092	0.0339155	0.7024	0.346302	0.858914	0.579805	0.301532	0.718269
GIPR	0.234424	0.288452	0.129495	0.138503	-0.0571892	0.124947	0.149028	0.216752	0.145826	0.316878
PHF7	0.336914	0.346224	0.251251	0.420866	0.454368	0.0587108	0.131723	0.302145	0.250837	0.278295
SEMA3G	0.473598	0.525887	0.342812	0.338291	0.851645	0.813044	0.293566	0.236441	0.143709	0.48611
NISCH	0.36059	0.229269	0.381071	0.356254	0.258293	0.587283	0.395027	0.103017	0.0655126	0.619083
STAB1	0.165766	0.141767	0.00483191	0.0390354	0.0452316	0.449364	0.296708	0.268706	0.189744	0.486338
FUZ	0.312197	0.248952	0.161758	0.244769	0.341893	0.60056	0.285017	0.981261	0.18357	0.368144
SLC6A13	0.482112	0.248496	0.203919	0.406243	0.332686	0.559769	0.874011	0.316851	0.170237	0.207862
IDS	0.608721	0.579766	0.541811	0.616566	0.66391	0.55603	0.729221	0.911102	0.294935	0.611178
PRSS3	0.783496	0.503291	0.409935	0.696392	0.455397	0.457142	0.45538	0.799034	0.886679	0.619021
ZNF200	0.405814	0.401775	0.370866	0.53566	0.630336	0.669029	0.244737	0.784154	0.178257	0.490552
CD4	0.14198	0.169807	0.0128909	0.158572	-0.0159181	0.249531	0.273552	0.0147782	0.0528756	0.475482
LRRC23	0.528266	0.465	0.466306	0.541964	0.684919	0.482451	0.641469	0.205622	0.325043	0.429826
BTK	0.494724	0.0471084	0.430093	0.0706013	0.604478	0.631351	0.709419	0.0710741	0.279899	0.0189805
HFE	0.595688	0.626484	0.482154	0.429664	0.714918	0.497369	0.666657	0.00351197	0.390968	0.678531
SCMH1	0.481959	0.511469	0.402558	0.472096	0.548277	0.437887	0.508725	0.591818	0.388385	0.474819
FYN	0.71646	0.70496	0.720062	0.455223	0.661817	0.418616	0.662643	0.0866766	0.610999	0.677795
HIVEP2	0.614268	0.506056	0.658668	0.548804	0.512654	0.665329	0.479803	0.595711	0.414567	0.459478
FMO1	0.574026	0.321881	0.582721	-0.0516941	0.217371	0.625109	0.732579	-0.146144	0.00162099	0.500281
TCEB3	0.616185	0.590996	0.517845	0.497237	0.612642	0.576569	0.56941	0.75204	0.514665	0.66675
LYPLA2	0.572793	0.616395	0.543295	0.328715	0.641415	0.568471	0.753761	0.855647	0.349936	0.407532
CLCN6	0.466925	0.318496	0.454999	0.431799	0.384152	0.44937	0.542578	0.291437	0.113313	0.465134
MRC2	0.672921	0.675792	0.610576	0.4725	0.785285	0.306193	0.685636	0.537346	0.121406	0.711019
SLC6A7	0.0472257	0.0557761	-0.0138179	0.0520931	-0.0261784	0.0829413	-0.0488755	0.186186	0.0434657	0.0577404
TSPAN9	0.542804	0.425716	0.523258	0.43739	0.614928	0.527854	0.759147	0.836442	0.214774	0.336894
BTBD7	0.546378	0.317792	0.551681	0.565463	0.632367	0.605632	0.647957	0.666536	0.449706	0.727279
APBA3	0.462646	0.510907	0.447858	0.42184	0.573966	0.482633	0.405383	0.514467	0.238052	0.386525
MKS1	0.407634	0.550772	0.533355	0.205162	0.500312	0.416943	0.429515	0.733924	0.167386	0.522377
ABHD5	0.572936	0.641147	0.593541	0.461532	0.647924	0.483103	0.521884	0.235091	0.428751	0.702301
KAL1	0.746047	0.719732	0.754272	0.748213	0.018728	0.854546	0.49521	0.30585	0.532994	0.875495
AKAP8L	0.260425	0.181645	0.160864	0.191966	0.484789	0.630308	0.158957	-0.107615	0.143319	0.191232
MBTD1	0.450179	0.533994	0.426521	0.335836	0.32456	0.66944	0.442428	0.397013	0.262047	0.524702
UTP18	0.596846	0.538954	0.501242	0.555994	0.317366	0.383086	0.531906	0.44617	0.54921	0.774289
RNF216	0.614518	0.578901	0.572405	0.363219	0.508774	0.724553	0.623692	0.408802	0.517528	0.637747
TTC19	0.668015	0.623503	0.748745	0.63725	0.438467	0.786911	0.594896	0.786214	0.680125	0.572846
PTBP1	0.489257	0.329134	0.450769	0.35386	0.545136	0.538468	0.308489	0.413433	0.26872	0.654039
DPF1	0.329073	0.554133	0.304577	0.17714	0.582525	0.367587	0.337544	0.430727	0.102887	0.308587
SYT7	0.495826	0.398597	0.321095	0.466081	0.264181	0.321295	0.253613	0.172148	0.264086	0.646174
LARS2	0.609878	0.354514	0.620823	0.571185	0.737963	0.68315	0.486678	0.264895	0.540528	0.732168
PIK3C2A	0.476139	0.59832	0.437256	0.364143	0.362802	0.535627	0.416149	0.617291	0.374683	0.448722
PLAUR	0.7378	0.532103	0.745387	0.463369	0.737607	0.687937	0.68457	0.69478	0.453786	0.881906
ANLN	0.460104	0.442563	0.582884	0.251552	0.732714	0.628142	0.319753	0.770606	0.368907	0.682883
WIZ	0.27887	0.389779	0.122456	0.394185	0.389513	0.597208	0.095388	0.457299	0.162073	0.2175
RABGAP1	0.658986	0.544781	0.660868	0.773318	0.443113	0.755389	0.516016	0.322693	0.336614	0.792791
DCN	0.739087	0.849998	0.410871	0.502597	0.656293	0.882518	0.595064	0.906594	0.084623	0.436799
QPCTL	0.287904	0.388056	0.396685	0.0310051	0.5464	0.442927	0.166126	0.000795226	0.0302492	0.419866
PPP5C	0.368304	0.322501	0.345296	0.274396	0.410509	0.367997	0.756839	0.716377	0.167284	0.599648
CEP68	0.585286	0.444923	0.579262	0.410925	0.337944	0.44093	0.458584	0.488901	0.57487	0.681903
MAP4K3	0.563415	0.507175	0.702991	0.713462	0.509619	0.349019	0.6008	0.725445	0.211842	0.501139
ZBTB32	0.449893	0.110222	0.443274	0.751669	0.00736897	0.0996113	0.689796	-0.013957	0.320875	0.10974
TYROBP	0.169584	0.0712484	0.164052	0.181998	0.299802	0.658063	0.216234	0.0231699	0.0532017	0.197851
TMEM159	0.645514	0.55893	0.663147	0.743951	0.541895	0.486547	0.470387	0.540123	0.397213	0.664838
GABRA3	0.402601	0.148236	0.310637	0.297692	0.640742	0.233725	0.445238	0.677745	0.427991	0.429108
BRCA1	0.493377	0.581754	0.490254	0.194482	0.409339	0.754211	0.316027	0.35284	0.293405	0.577278
ERCC1	0.661512	0.711593	0.492511	0.699409	0.779405	0.809742	0.438836	0.528369	0.533444	0.654896
CD22	0.589674	0.125641	0.644975	0.18615	0.447261	0.627099	0.735806	0.199315	0.369872	0.501171
SEMA3B	0.533719	0.413078	0.455543	0.542221	0.306523	0.678003	0.58561	0.272904	0.39273	0.583902
MBTPS2	0.425975	0.343834	0.425383	0.243154	0.509213	0.622927	0.188674	0.46751	0.327522	0.568649
PRICKLE3	0.339192	0.404378	0.202638	0.26204	0.421363	0.558798	0.519957	0.432332	0.13951	0.355069
LTF	0.56241	0.621989	0.622199	0.019741	0.458432	0.575598	0.489247	-0.137377	0.178449	0.380672
EXTL3	0.550577	0.717239	0.317772	0.418081	0.53199	0.446857	0.528602	0.63678	0.373646	0.449286
NR1H4	0.783998	0.109566	0.911383	0.7728	0.938942	0.561159	0.901882	0.908674	0.590398	0.660118
ELOVL5	0.832991	0.702333	0.650871	0.818396	0.744466	0.50753	0.849283	0.97178	0.812059	0.530428
ALOX5	0.664784	0.506278	0.600991	0.585989	0.107263	0.277665	0.798447	0.585116	0.585753	0.396406
KDM5D	0.82345	0.213561	0.862017	0.883458	0.935487	0.116085	0.47974	0.151541	0.822926	0.800223
CALCOCO1	0.335553	0.293395	0.243938	0.304812	0.25945	0.436526	0.424303	0.342625	0.235121	0.419402
UBR7	0.528829	0.639676	0.699075	0.379737	0.484209	0.841745	0.350002	0.0203408	0.339615	0.580299
MAP4K5	0.586853	0.714979	0.542566	0.424787	0.635063	0.6584	0.419324	0.833262	0.319904	0.680221
EHD3	0.703796	0.518304	0.700446	0.665824	0.859374	0.591963	0.719079	0.644367	0.163162	0.725946
PSMC4	0.540021	0.646305	0.459097	0.388626	0.493517	0.742438	0.628351	0.463036	0.366145	0.587925
MAN2B2	0.679973	0.65506	0.575842	0.687871	0.820976	0.541804	0.574145	0.518487	0.676546	0.629606
SLC7A14	0.306817	0.0516636	0.480542	0.0349244	0.112041	0.373586	-0.0725607	0.383072	0.191426	0.0868232
CLDN11	0.56321	0.412153	0.779417	0.215498	0.356086	0.607733	0.194297	-0.0217422	0.0704562	0.676751
SLC25A39	0.575751	0.49914	0.391296	0.588218	0.684814	0.504822	0.622454	0.489044	0.264757	0.559938
MVP	0.813647	0.774434	0.74596	0.64042	0.768778	0.628118	0.500196	0.964036	0.51479	0.634111
NUB1	0.590899	0.455412	0.498773	0.676394	0.555505	0.6933	0.447418	0.757512	0.656785	0.770845
PGM3	0.688136	0.67253	0.610138	0.696492	0.844638	0.55323	0.65241	0.623505	0.567178	0.834695
RWDD2A	0.515031	0.388854	0.25562	0.576175	0.660217	0.477108	0.632118	0.532654	0.417932	0.508296
CLK1	0.296302	0.334023	0.32586	0.234724	0.236633	0.50005	0.225472	-0.058563	0.0913245	0.464616
POLR3B	0.496731	0.521868	0.469835	0.54496	0.696554	0.519623	0.61247	0.110854	0.304415	0.777952
ANGEL1	0.532954	0.464908	0.634024	0.429749	0.478193	0.688083	0.293151	0.36057	0.309126	0.771054
RNF14	0.627482	0.663118	0.405137	0.693216	0.796604	0.714126	0.699189	0.250237	0.272215	0.63096
DNASE1L1	0.746741	0.596647	0.731244	0.610927	0.857906	0.752411	0.45754	0.747586	0.490565	0.798458
DDX11	0.491104	0.346825	0.367792	0.661368	0.505157	0.634948	0.657627	0.392968	0.255598	0.537149
HEBP1	0.721601	0.751199	0.770802	0.71226	0.723785	0.869044	0.954769	0.126065	0.699583	0.802828
GPRC5A	0.826951	0.483374	0.687886	0.47234	0.619509	0.777232	0.786919	0.566476	0.798544	0.738907
MAMLD1	0.653818	0.558698	0.582551	0.512784	0.624781	0.459417	0.396953	0.480271	0.575415	0.680518
CD6	0.257761	0.402724	0.104702	0.301172	0.202944	0.263332	0.31312	0.491959	0.0649273	0.0581647
TACC3	0.40533	0.19501	0.415426	0.353681	0.331189	0.616389	0.33155	0.342857	0.341465	0.303049
UFL1	0.515959	0.631373	0.474049	0.47533	0.586844	0.499146	0.676374	0.789672	0.212265	0.701478
POLA2	0.419956	0.359254	0.265151	0.332353	0.510038	0.497462	0.430893	0.85119	0.215387	0.508981
ZC3H3	0.29943	0.437593	0.289616	0.293087	0.465436	0.325523	0.163513	0.463509	0.104195	0.257934
CAPN1	0.640913	0.428038	0.416242	0.310673	0.538087	0.54731	0.738242	0.571626	0.27997	0.47016
ACPP	0.678805	0.666153	0.664441	0.636905	0.702681	0.449332	0.571735	0.872719	0.578726	0.551152
MDH1	0.518983	0.489183	0.523612	0.587829	0.907708	0.246451	0.221135	0.0222042	0.463586	0.566535
SLC30A9	0.560045	0.439635	0.462202	0.737745	0.878852	0.618581	0.673084	0.918991	0.487468	0.381375
MTMR11	0.793105	0.609772	0.681655	0.745858	0.568507	0.613964	0.894741	0.90909	0.595625	0.750166
COX15	0.484995	0.364043	0.425326	0.406404	0.532463	0.75932	0.698701	0.942638	0.36986	0.807439
CCDC88C	0.653776	0.405994	0.42077	0.63473	0.610626	0.512117	0.679115	0.138567	0.33966	0.647409
YAF2	0.417178	0.406535	0.256762	0.31962	0.535763	0.510164	0.629467	0.102363	0.179287	0.67094
ZMYND11	0.635225	0.731817	0.71873	0.409963	0.785119	0.375158	0.347553	0.528709	0.426959	0.605469
WAS	0.280723	0.324233	0.399661	0.0231287	0.0887779	0.129212	0.185673	-0.0364045	0.114272	0.368997
DPEP1	0.748781	0.269639	0.43689	0.157766	0.116401	0.228511	0.130852	0.0728086	0.767602	0.285738
BID	0.721249	0.709552	0.813666	0.83467	0.664086	0.576099	0.727773	0.423144	0.425322	0.520984
NPC1L1	0.467488	0.450867	0.232784	0.37728	0.305596	0.21797	0.114197	0.318703	0.432178	0.116656
XYLT2	0.223282	0.305639	0.229971	0.148567	0.188983	0.350884	0.187077	-0.138121	0.0810356	0.385195
STMN4	0.148776	0.0901234	0.11209	0.0254835	0.05335	0.1774	0.0433062	0.0286513	0.0127159	0.243627
NUDCD3	0.29988	0.454692	0.335323	0.218978	0.309266	0.235957	0.1929	0.127969	0.144965	0.198998
ISL1	0.678655	0.557225	0.6747	0.748093	0.731602	0.43687	0.40948	0.764633	0.687564	0.875427
CHDH	0.802945	0.800497	0.648448	0.738038	0.723305	0.562537	0.429375	0.833916	0.83796	0.499812
IL20RA	0.76358	0.570215	0.554372	0.47854	0.379804	0.736337	0.830597	0.496615	0.574486	0.734839
CLCA1	0.522914	0.00280534	0.0890245	0.217586	0.0992826	0.0738247	0.116314	0.912072	0.527892	0.517268
CLCA4	0.524937	0.803601	0.458496	0.66133	0.205889	0.476298	0.877451	0.944692	0.290454	0.497313
GLT8D1	0.695475	0.707113	0.510572	0.676235	0.756492	0.39183	0.621626	0.516565	0.5582	0.755408
ATP2C1	0.501712	0.692759	0.488599	0.516467	0.564055	0.279278	0.710724	0.144882	0.318274	0.735721
IGF1	0.701347	0.464634	0.429594	0.193397	0.59365	0.891381	0.278752	0.314793	0.577523	0.527297
SLC38A5	0.77104	0.513612	0.732084	0.871875	0.476898	0.287693	0.527378	0.741675	0.734012	0.867929
RALBP1	0.608471	0.484969	0.544829	0.588688	0.425862	0.588061	0.6723	0.897786	0.457414	0.72395
RUFY3	0.522422	0.425428	0.463204	0.401655	0.535404	0.513679	0.601661	0.797589	0.140992	0.741868
CNTN1	0.685191	0.877232	0.548325	0.174407	0.877878	0.354457	0.392743	0.879465	-0.0270407	0.831817
SLC11A1	0.183577	0.0278231	0.106011	0.302564	0.0303753	0.250388	-0.00426522	0.290031	0.0227409	0.154912
WWTR1	0.859201	0.842904	0.675187	0.594706	0.841795	0.722871	0.938798	0.604696	0.655471	0.886916
AGPS	0.593932	0.58589	0.614163	0.361666	0.642915	0.738743	0.269148	0.751039	0.364205	0.818773
CXorf56	0.226789	0.257463	0.104918	0.28345	0.427662	0.221784	0.246187	-0.0654508	0.215725	0.205153
ATP1A2	0.688306	0.303755	0.802167	-0.0159099	0.87818	0.627084	0.645616	0.0835656	-0.0455099	0.249926
TTC27	0.514148	0.472704	0.601682	0.262503	0.440867	0.600755	0.462869	0.500458	0.54092	0.800741
ZNF582	0.200895	0.177699	0.26943	0.0171034	0.276148	0.370601	0.192871	0.0706859	0.0483815	0.332749
VSIG2	0.87695	0.468359	0.582679	0.813016	0.102245	0.766078	0.84107	0.959854	0.789723	0.428842
PHLDB1	0.262427	0.3889	0.184298	0.030323	0.565369	0.241618	0.120081	0.534028	0.105586	0.510946
MARCO	0.535834	0.863744	0.0930511	-0.0209688	0.159823	0.189421	0.130085	-0.0363136	0.00692844	0.513153
CYP24A1	0.589666	0.483659	0.585791	0.832322	0.295591	0.521197	0.373107	0.976589	0.441495	0.251032
PRDM11	0.553593	0.546577	0.567005	0.381883	0.656186	0.613851	0.472536	0.561215	0.354245	0.737829
SYT13	0.748984	0.569434	0.706732	0.763997	0.713852	0.392913	0.910787	0.805067	0.664891	0.486358
SNAI2	0.836287	0.734699	0.838924	0.850336	0.434476	0.822273	0.447324	0.960646	0.712758	0.860032
CD74	0.42561	0.385743	0.344635	0.381535	-0.00717497	0.367853	0.48095	0.300491	0.352802	0.2764
HGF	0.781953	0.972603	0.455065	0.225965	0.151265	0.0156163	0.916415	-0.0154104	0.0827526	0.791946
ZRANB1	0.574489	0.714576	0.439719	0.665274	0.657639	0.706921	0.44265	0.783857	0.287745	0.750825
NCDN	0.29043	0.442078	0.166862	0.295256	0.282943	0.17367	0.2946	0.640533	0.114104	0.425303
GPR124	0.820683	0.663694	0.525591	0.00956455	0.835165	0.615172	0.588075	0.260903	0.397288	0.832446
ZFP64	0.603297	0.79348	0.721046	0.432343	0.384039	0.482614	-0.00613675	0.661483	0.364376	0.566817
SAMD4A	0.609391	0.695571	0.751688	0.443223	0.79051	0.422274	0.204538	0.71683	0.329576	0.536136
RUNX3	0.729345	0.833435	0.733304	0.633867	0.566967	0.722083	0.577387	0.895161	0.51921	0.777334
MRE11A	0.374617	0.503636	0.270973	0.306346	0.150244	0.428893	0.753714	0.579059	0.323309	0.379042
PLEKHB1	0.786751	0.875321	0.780659	0.687714	0.808139	0.811353	0.518798	0.704031	0.613066	0.631878
SERPINB1	0.848655	0.65173	0.698867	0.804586	0.67686	0.729882	0.788126	0.760895	0.650371	0.879204
CYP3A43	0.287485	0.155666	0.0509232	0.29827	-0.0105028	0.451332	0.102006	0.882524	0.267838	0.178746
SLC7A9	0.716763	0.415605	0.670288	0.593074	0.738748	0.526882	0.887398	0.908087	0.717209	0.196194
SPAST	0.424584	0.531522	0.491986	0.352956	0.337769	0.310617	0.12262	0.21615	0.0972264	0.776868
NRXN3	0.669275	0.623226	0.845766	0.678806	0.563253	0.416145	-0.0181031	-0.0714535	0.636398	0.790476
OSBPL5	0.645344	0.573201	0.5693	0.559136	0.645349	0.417421	0.662056	0.511032	0.599169	0.600036
AQR	0.512306	0.522587	0.419993	0.437148	0.729986	0.693862	0.220879	0.790557	0.436972	0.600621
CPS1	0.671881	0.55517	0.724869	0.756529	0.592683	0.644603	0.52534	0.882739	0.62378	0.828093
C8B	0.345096	0.187943	0.223111	0.24808	0.596983	0.135923	0.284962	0.145404	0.00969613	0.0216366
FHL1	0.547354	0.593426	0.465332	0.141746	0.750008	0.825501	0.504209	0.440085	0.0952627	0.680432
RTFDC1	0.223251	0.0535179	0.255591	0.142591	0.159123	0.106169	0.338136	0.216861	0.332625	0.276071
GABRA1	0.565351	-0.0198786	0.252548	0.146463	-0.0905671	-0.0166824	0.0200534	0.0122502	0.0548364	0.152159
NLRP2	0.854951	0.82188	0.777763	0.950264	0.927602	0.729833	0.973562	0.868048	0.831623	0.303837
SLC45A4	0.732424	0.532771	0.76725	0.420583	0.511125	0.511249	0.509606	0.873666	0.50471	0.618373
RNF10	0.596102	0.546366	0.519907	0.698692	0.649954	0.526905	0.307069	0.634428	0.628159	0.759369
ZNF839	0.383864	0.445602	0.469836	0.343255	0.444348	0.539738	0.267746	0.72544	0.0889883	0.487979
ZDHHC6	0.62698	0.617129	0.423603	0.69992	0.636329	0.53481	0.461756	0.827195	0.603377	0.595132
GRAMD1B	0.663607	0.446961	0.687612	0.708826	0.337829	0.501501	0.420924	0.823258	0.572959	0.550762
RNH1	0.286122	0.177242	0.255235	0.136872	0.349885	0.406478	0.42586	0.274223	0.135651	0.444018
NDUFS1	0.517723	0.589999	0.565323	0.301151	0.530244	0.519277	0.386908	0.818159	0.493912	0.509519
RB1CC1	0.549222	0.576893	0.555658	0.410539	0.53328	0.482051	0.522127	0.916127	0.457797	0.665793
ERP44	0.549473	0.477062	0.634928	0.462854	0.610752	0.63497	0.50395	0.423707	0.439171	0.635182
ALAS1	0.6681	0.536573	0.36775	0.705638	0.554564	0.676119	0.651506	0.428081	0.574979	0.728566
BIRC3	0.733828	0.660182	0.699193	0.632916	0.489722	0.582194	0.785308	0.69672	0.426288	0.635707
AKAP11	0.601535	0.49652	0.476262	0.588653	0.918781	0.740425	0.407956	0.809785	0.296664	0.822712
GLRX2	0.557532	0.456876	0.482997	0.444498	0.765254	0.925859	0.306761	0.0045489	0.363387	0.6251
SNAPC1	0.64088	0.553049	0.756881	0.498896	0.643306	0.593426	0.411247	0.650691	0.3565	0.768793
DERA	0.639628	0.622475	0.487847	0.589431	0.778498	0.842952	0.755322	0.275366	0.290615	0.708129
STRAP	0.705094	0.644431	0.616158	0.732317	0.701742	0.758439	0.553173	0.819797	0.463391	0.821585
ABCC2	0.757	0.750567	0.795902	0.49318	0.743493	0.72855	0.634369	0.00230968	0.809791	0.490239
DEF6	0.617385	0.392374	0.553179	0.335281	0.546108	0.232548	0.658825	0.705184	0.374671	0.637084
PLEKHO1	0.670924	0.702491	0.461272	0.301684	0.782579	0.749148	0.453328	0.248185	0.259814	0.826731
GCLM	0.601214	0.467702	0.750056	0.619662	0.691993	0.799692	0.440464	0.465643	0.142759	0.652012
UBR2	0.527084	0.393134	0.626987	0.676969	0.485254	0.645832	0.332969	0.78843	0.355107	0.540798
EHD2	0.72302	0.603374	0.650368	0.550254	0.557748	0.648577	0.466834	0.600611	0.349721	0.691085
DEPDC1	0.525331	0.492206	0.476911	0.311189	0.692278	0.524283	0.402661	0.425105	0.239917	0.713223
CCDC28A	0.544995	0.65902	0.381943	0.630656	0.652236	0.395808	0.419312	0.837141	0.60338	0.670654
RRAGD	0.785335	0.819187	0.645939	0.553378	0.831068	0.572522	0.84219	0.621952	0.76455	0.815214
HSF2	0.636736	0.588775	0.609052	0.395048	0.550112	0.669492	0.3965	0.520088	0.124742	0.765197
PHF20	0.62331	0.482908	0.522344	0.317686	0.580404	0.800354	0.735933	0.803181	0.765262	0.615487
HSD17B6	0.702119	0.35114	0.599335	0.244555	0.652092	0.812567	0.645075	0.81896	0.768755	0.842724
NR1H3	0.622602	0.551942	0.607011	0.550026	0.373285	0.538689	0.714616	0.819163	0.428351	0.529553
TYMP	0.596539	0.526994	0.608893	0.564887	0.57677	0.752825	0.304595	0.43767	0.394702	0.513173
NCAPH2	0.446826	0.5198	0.20416	0.449398	0.471637	0.33437	0.576311	0.560089	0.267991	0.499361
TOMM34	0.544505	0.700961	0.54488	0.310768	0.427858	0.545058	0.423097	0.199012	0.568254	0.489423
SEC63	0.595291	0.634518	0.407755	0.565939	0.472494	0.838143	0.672585	0.914786	0.250129	0.722972
KPNA6	0.598802	0.446586	0.780844	0.565777	0.61226	0.608019	0.700684	0.578612	0.415413	0.782858
VIM	0.370504	0.791195	0.237036	0.158419	0.655056	0.0526365	0.970235	0.204895	0.146295	0.982886
FAS	0.706089	0.710483	0.629616	0.698339	0.59084	0.878223	0.562772	0.831949	0.691435	0.809825
CD44	0.708327	0.533667	0.679445	0.610264	0.893537	0.60119	0.569846	0.466143	0.662244	0.775838
KCNG1	0.589477	0.69081	0.548388	0.315229	0.343851	0.371346	0.620634	0.826458	0.0561672	0.668094
AGPAT4	0.672053	0.774999	0.624345	0.409154	0.759328	0.325837	0.643355	0.332183	0.406165	0.620607
SLAMF7	0.664008	0.27585	0.721414	0.655487	0.581434	0.417591	0.61057	0.743873	0.378165	0.508172
BTN3A1	0.619537	0.688783	0.420797	0.628452	0.681235	0.654485	0.70846	0.619458	0.435732	0.502901
MIPEP	0.680016	0.534852	0.585694	0.724221	0.760656	0.681411	0.497857	0.392511	0.720535	0.669057
PRKCH	0.0484622	0.011703	-0.0254046	0.023577	0.0591848	0.204756	-0.0643573	0.293881	0.0958897	0.0503185
INSRR	0.116579	0.039206	0.123796	0.11999	0.0213554	0.12876	0.391926	0.149968	0.117355	0.00176628
IFNGR1	0.857759	0.699127	0.70492	0.646082	0.93312	0.615617	0.5372	0.264356	0.639021	0.785574
B4GALT7	0.594002	0.683627	0.525179	0.545353	0.680891	0.57523	0.674678	0.517398	0.387469	0.599368
SH2D2A	0.605176	0.78211	0.677519	0.489659	0.513142	0.45388	0.535201	0.434931	0.417759	0.6187
VRK2	0.61865	0.521431	0.814756	0.3768	0.725839	0.359377	0.339108	0.470457	0.310456	0.514716
TNFRSF1B	0.702188	0.318762	0.550448	0.792479	0.424555	0.71824	0.417238	0.81827	0.617843	0.743971
VEZT	0.553906	0.752418	0.464242	0.787849	0.769886	0.71055	0.789161	0.401524	0.107738	0.579972
POU2F2	0.615031	0.258549	0.631833	0.107659	0.267384	0.34369	0.743889	0.4744	0.453761	0.710798
BRD9	0.508739	0.627938	0.584273	0.390512	0.570215	0.399248	0.429552	0.688207	0.303015	0.596746
SNX1	0.619819	0.794788	0.536718	0.440963	0.525635	0.449373	0.618889	0.393651	0.365248	0.729278
TBPL1	0.480432	0.643882	0.398177	0.643415	0.592335	0.646344	0.333656	0.534486	0.0843099	0.60997
ARNTL2	0.811253	0.762322	0.711783	0.618536	0.738569	0.624513	0.802942	0.936294	0.634153	0.874645
BCLAF1	0.469385	0.430478	0.300029	0.360856	0.559015	0.835171	0.457249	0.933917	0.190578	0.584511
SLC39A9	0.510453	0.469585	0.492565	0.533924	0.67389	0.632781	0.497124	0.455989	0.506184	0.418567
ANK1	0.613553	0.553153	0.408513	0.589852	0.432494	0.463441	0.387297	0.988069	0.359583	0.776721
IBSP	0.466871	0.173011	0.335798	0.128874	0.13471	0.176491	0.251034	0.324418	0.0731567	0.270606
TFB1M	0.629918	0.481199	0.548063	0.420966	0.847928	0.635736	0.61223	0.752507	0.521841	0.838382
RABEP1	0.690944	0.77259	0.731069	0.367026	0.562509	0.52715	0.504001	0.557887	0.594714	0.66886
HMGB3	0.617158	0.503153	0.633458	0.478622	0.674504	0.765554	0.54965	0.762597	0.485991	0.183897
NUP160	0.427346	0.474686	0.260453	0.242792	0.255194	0.831901	0.5907	0.658036	0.225602	0.419236
MUSK	0.280103	0.114062	0.176722	0.258321	0.132871	0.180445	-0.00829518	0.337453	0.0840269	0.710359
GRN	0.530941	0.557016	0.37281	0.559985	0.649873	0.681358	0.651825	0.867007	0.180764	0.429292
FAM13B	0.54354	0.608456	0.332086	0.379468	0.449184	0.883717	0.538571	0.669142	0.240689	0.793123
ARHGAP31	0.583811	0.496306	0.4952	0.399158	0.50156	0.183322	0.687215	0.378938	0.166507	0.329491
CENPQ	0.454538	0.272048	0.364477	0.413838	0.612067	0.687494	0.742666	0.0145671	0.184748	0.605387
SARS	0.60901	0.678375	0.560753	0.62976	0.741076	0.775112	0.803461	0.870141	0.430012	0.582534
RANBP3	0.433797	0.455929	0.194657	0.491641	0.478737	0.442266	0.572502	0.421097	0.370021	0.482258
ARID4A	0.440347	0.46222	0.322709	0.49963	0.306118	0.484978	0.520217	0.84913	0.13844	0.723461
TSSC1	0.590013	0.469121	0.677055	0.447095	0.364646	0.49974	0.390278	0.412458	0.440024	0.606149
PNPLA6	0.499751	0.471676	0.359284	0.384072	0.616625	0.67597	0.526242	0.427937	0.311945	0.804588
IFT88	0.660348	0.624449	0.474116	0.618918	0.621889	0.730625	0.895379	0.410982	0.578351	0.771674
ALG1	0.434424	0.333035	0.357806	0.379427	0.297058	0.495753	0.42851	0.489936	0.222334	0.598909
ZCCHC8	0.38283	0.606762	0.230401	0.566064	0.249552	0.644107	0.379032	0.550254	0.147469	0.665548
ABCF2	0.483299	0.600829	0.282072	0.495266	0.703152	0.51621	0.638857	0.799514	0.256792	0.686493
CHPF2	0.613436	0.769943	0.536907	0.442288	0.622503	0.572197	0.654244	0.607425	0.473253	0.763811
LRRC7	0.53788	0.275801	0.934746	0.0105971	0.598833	0.417627	0.610353	0.859328	0.047234	0.425829
FUT8	0.688184	0.641907	0.677908	0.64198	0.85112	0.705411	0.753711	0.725986	0.61731	0.559952
UBA6	0.629406	0.496806	0.733132	0.385063	0.827267	0.714976	0.935468	0.108396	0.172968	0.514628
GAB2	0.5876	0.635761	0.372888	0.386663	0.617477	0.542294	0.592629	0.759929	0.535876	0.544741
ATP6V0A1	0.453753	0.333255	0.353187	0.385555	0.576839	0.543439	0.700853	0.171012	0.253636	0.250214
PIAS1	0.662319	0.718798	0.504658	0.531276	0.574241	0.66904	0.742896	0.949251	0.527965	0.610581
SLC4A7	0.591219	0.63651	0.595926	0.457576	0.64028	0.448492	0.705806	0.606189	0.23448	0.710568
APBA2	0.693054	0.700115	0.604786	0.23571	0.785614	0.700172	0.752998	0.632153	0.088322	0.650716
MAP2K3	0.737518	0.515962	0.733309	0.570689	0.770438	0.847751	0.736152	0.574915	0.536448	0.732683
EFCAB1	0.511367	0.405556	0.677784	0.559995	0.177443	0.742966	0.302087	0.748305	0.0121958	0.645153
TMSB10	0.50078	0.443273	0.489968	0.223842	0.677675	0.115083	0.673219	0.681937	0.760662	0.915214
ASTE1	0.505405	0.416069	0.412331	0.528984	0.644236	0.666137	0.545557	0.323482	0.566021	0.655708
RNF19A	0.58665	0.685508	0.644995	0.45518	0.26487	0.551104	0.67837	0.41451	0.519864	0.59513
PEX3	0.430021	0.477882	0.36115	0.310421	0.420266	0.507584	0.285156	0.178805	0.255671	0.558978
GABARAPL2	0.516977	0.461961	0.57586	0.569375	0.844746	0.714249	0.326411	0.398173	0.289808	0.393832
MYOC	0.461896	0.0381721	0.132614	0.027327	0.809261	0.242159	0.149739	0.339643	0.0301947	0.745982
SH3YL1	0.760504	0.604986	0.620578	0.573433	0.595933	0.545112	0.691134	0.840408	0.647397	0.621186
FAM136A	0.587449	0.714643	0.744004	0.4275	0.583283	0.372824	0.211305	0.484236	0.379739	0.318011
VCL	0.557022	0.246858	0.774805	0.202328	0.435343	0.604875	0.517973	0.503736	0.712564	0.746125
DEPDC1B	0.429212	0.36842	0.347191	0.477074	0.494714	0.388163	0.44125	0.429761	0.188302	0.455119
DAPK2	0.571528	0.614045	0.563626	0.361363	0.147204	0.0801262	0.701993	0.196445	0.448883	0.309
NSMAF	0.648276	0.685229	0.726459	0.510997	0.659451	0.541266	0.764526	0.788576	0.2309	0.720316
ADSS	0.624794	0.559417	0.593846	0.475662	0.384933	0.90399	0.751315	0.816661	0.132512	0.524602
STAP1	0.81409	0.407476	0.776019	0.180803	-0.00133869	-0.00547529	0.973881	0.00292647	0.854732	-0.066844
TIMP2	0.700855	0.532966	0.646634	0.319612	0.640238	0.845763	0.556624	0.84575	0.510855	0.965462
RFC1	0.649583	0.391869	0.729781	0.451617	0.756185	0.760315	0.631989	0.491609	0.512949	0.648084
TBC1D23	0.545424	0.583984	0.53752	0.512651	0.467241	0.671335	0.78309	0.061244	0.260462	0.739467
CUL3	0.458704	0.40367	0.555706	0.356395	0.79097	0.641985	0.284315	-0.0144664	0.289927	0.568288
MYOM2	0.60729	0.587704	0.376303	0.56963	0.814606	0.40886	0.677603	0.214398	0.348712	0.663608
CYP46A1	0.194397	0.22351	0.0651619	0.0905571	0.386524	0.0663557	0.297031	0.583694	0.0633865	0.220371
ZZZ3	0.557178	0.665596	0.347637	0.518357	0.750472	0.62933	0.451822	0.352872	0.319655	0.721013
SLC18A1	0.552551	-0.0165809	0.408077	0.165179	0.341096	-0.0500482	0.235937	0.376627	0.502192	0.583188
USP2	0.286315	0.349149	0.228926	0.13921	0.528964	0.525535	0.500251	0.0598365	0.141205	0.629409
CASR	0.503534	0.0222214	0.316368	0.648834	0.00131266	0.139138	0.177785	-0.0058892	0.102156	0.304549
TUBG2	0.469251	0.429291	0.428174	0.264409	0.341385	0.740676	0.508624	0.595724	0.228616	0.478769
FLT4	0.118858	0.161796	0.0291402	0.163627	0.0422369	-0.0358162	0.0957235	-0.0083118	0.110944	0.505984
NSUN2	0.667554	0.59481	0.78666	0.572934	0.536798	0.28314	0.462695	0.39445	0.594374	0.706886
FBXO42	0.576505	0.43058	0.694266	0.541329	0.714649	0.357842	0.343466	0.47252	0.464042	0.639818
MFAP3	0.251251	0.288103	0.219237	0.255391	0.545221	0.438204	0.37798	0.277071	0.0555864	0.402016
MRI1	0.582916	0.666221	0.539439	0.47391	0.46592	0.753978	0.39819	0.468012	0.493809	0.649268
METTL1	0.574031	0.714026	0.529056	0.552708	0.74386	0.571174	0.601143	0.304406	0.166435	0.844498
AGA	0.646074	0.562291	0.549907	0.518451	0.668559	0.697018	0.531577	0.574366	0.479122	0.825475
PI4K2B	0.647996	0.601287	0.66567	0.526437	0.694784	0.623216	0.278129	0.8263	0.553063	0.824253
BOD1L1	0.445146	0.519299	0.430001	0.346645	0.328953	0.50695	0.497982	0.498911	0.133206	0.792801
MAT2B	0.576348	0.521963	0.469475	0.461247	0.640969	0.63522	0.224888	0.642917	0.298208	0.880504
TLL1	0.227984	0.325319	0.380844	0.034399	0.0586596	0.310214	0.10102	-0.0762237	-0.0361929	0.088966
TRIO	0.56552	0.506149	0.5607	0.425197	0.296955	0.379916	0.426736	0.556866	0.381588	0.787065
VCAN	0.74691	0.693141	0.697992	0.73933	0.8609	0.46745	0.416896	0.981113	0.512474	0.936355
CLEC16A	0.359302	0.372271	0.412529	0.0874534	0.516512	0.430004	0.292763	0.195016	0.330552	0.377827
MSR1	0.263566	0.0316884	0.0382915	0.0850148	0.000981821	0.840442	0.231337	-0.0452237	0.0367569	0.345267
CDH1	0.825192	0.562724	0.825793	0.283282	0.760168	0.813457	0.642661	0.589413	0.31604	0.403142
SKIV2L2	0.616659	0.602944	0.634951	0.599433	0.539965	0.796359	0.170453	0.725752	0.688092	0.657101
DNAH5	0.629519	0.568309	0.623031	0.604846	0.622399	0.633792	0.598899	0.452036	0.274648	0.770174
ZFYVE16	0.470823	0.355045	0.153129	0.43766	0.535385	0.68165	0.285716	0.149723	0.122809	0.513826
FAM65A	0.492989	0.573032	0.521599	0.324086	0.627612	0.377668	0.39416	0.587447	0.358325	0.435056
C6	0.406988	0.0785531	0.324181	0.621977	0.445339	0.251215	0.451111	0.778185	0.0297441	0.064274
RAI14	0.704708	0.693161	0.886861	0.486107	0.702331	0.320755	0.536519	0.412187	0.517947	0.923504
SOX30	0.616255	0.438884	0.817521	0.214211	0.555388	0.711697	0.845096	0.73839	0.442046	0.558731
PNKP	0.541738	0.647822	0.405474	0.403759	0.600925	0.382654	0.549551	0.898635	0.299574	0.721182
BEST2	0.253545	0.266448	0.0312931	0.0474911	0.379936	0.626353	0.260657	0.196006	0.16984	0.181394
PHLPP2	0.481614	0.556007	0.31114	0.398336	0.601475	0.505205	0.380486	0.71143	0.261102	0.557055
SPDL1	0.543085	0.538037	0.621218	0.445209	0.78072	0.774634	0.376196	0.297964	0.238118	0.589672
STAU2	0.5146	0.634847	0.468988	0.394062	0.573807	0.5351	0.691054	0.61876	0.397491	0.614367
PQLC2	0.581899	0.300431	0.667885	0.638535	0.701535	0.576131	0.702062	0.632708	0.346715	0.745299
CTNS	0.704893	0.62738	0.71386	0.453076	0.731548	0.703401	0.746579	0.928572	0.567771	0.807892
RTN4R	0.511933	0.510758	0.431323	0.196536	0.764781	0.503785	0.281268	0.592603	0.409463	0.436568
PHF23	0.594659	0.611337	0.44135	0.535323	0.76699	0.622705	0.772742	0.756488	0.427111	0.685935
CDH10	0.80506	0.486291	0.758146	0.201243	0.957473	0.838614	0.264914	0.128736	0.0101858	0.944822
INPP4A	0.555176	0.516633	0.490256	0.422441	0.46007	0.717118	0.518445	0.60518	0.530422	0.655171
RAB27B	0.736766	0.684446	0.702949	0.443866	0.668036	0.84416	0.554173	0.48577	0.662905	0.674709
PSMA4	0.507141	0.624773	0.471994	0.480777	0.431232	0.576031	0.580051	0.364748	0.309989	0.596454
MYO16	0.433059	0.292568	0.583666	0.130395	0.394472	0.56498	0.147908	0.350213	0.15728	0.473719
LSG1	0.668811	0.658177	0.847355	0.504263	0.66607	0.540413	0.863174	0.245326	0.51582	0.405676
PARP3	0.509946	0.287993	0.325489	0.465915	0.790383	0.486777	0.61889	0.161977	0.342336	0.697238
TNC	0.768891	0.805372	0.862362	0.641867	0.741693	0.533169	0.521257	0.984843	0.34143	0.658496
THAP3	0.191146	0.377163	0.308021	0.164477	0.211783	0.195582	0.309696	-0.0879171	-0.0173771	0.181137
FAM65C	0.56076	0.765188	0.417337	0.320844	0.125418	0.179526	0.739437	0.0719289	0.237654	0.727684
TDP1	0.475266	0.442821	0.477816	0.276613	0.58553	0.683457	0.455134	0.231445	0.367252	0.612305
AIFM2	0.659158	0.502078	0.500897	0.631046	0.715537	0.651174	0.440592	0.353007	0.512938	0.559124
C2orf83	0.0310218	-0.0760972	0.261175	0.0212311	0.0457796	-0.0247981	-0.0124046	-0.0187893	0.000854061	-0.00745851
SPATA7	0.570382	0.571279	0.478844	0.538643	0.469175	0.672161	0.570202	0.226824	0.453958	0.721536
MED17	0.4743	0.540704	0.336652	0.408316	0.16965	0.583897	0.61617	0.82245	0.238973	0.68932
RETSAT	0.753158	0.567296	0.569093	0.453781	0.835031	0.786712	0.624835	0.928706	0.591493	0.489206
CAPG	0.642283	0.500744	0.602696	0.240221	0.449373	0.725152	0.668016	0.688075	0.257688	0.697833
AP2S1	0.481799	0.499905	0.203736	0.453466	0.589475	0.445153	0.756356	0.878875	0.2336	0.452756
USH2A	0.464744	0.00618625	-0.0508397	-0.0270819	0.0918536	-0.0969233	0.00106196	-0.0490469	0.00159489	0.146465
ZPBP	0.0817755	-0.0183634	0.0445557	0.100515	0.0379728	0.353281	0.0713229	0.188511	0.0335734	0.0658511
TG	0.262839	0.0307304	0.0463516	0.166102	0.0985678	0.140444	0.462167	-0.0337038	0.451161	0.216684
ADAM28	0.758974	0.345543	0.607879	0.686991	0.249135	0.849017	0.456037	0.667751	0.364289	0.408978
BARX2	0.501194	0.678368	0.326514	0.346617	0.344098	0.508654	0.62789	0.342547	0.192017	0.35022
DCUN1D1	0.384351	0.563696	0.44405	0.47998	0.320332	0.475398	0.394849	0.122502	0.161856	0.390904
JADE2	0.586635	0.570618	0.520076	0.32755	0.741247	0.294036	0.538774	0.230031	0.353921	0.458986
ZIC2	0.697598	0.717897	0.493712	0.764257	0.91864	0.675949	0.553292	0.671907	0.70088	0.717927
LCP2	0.755749	-0.00978005	0.812852	-0.0142352	0.801599	0.808238	0.696328	0.288088	0.755791	0.740838
TRIT1	0.574801	0.625183	0.607855	0.440403	0.754096	0.527385	0.655643	0.771753	0.487162	0.506392
ADRB1	0.602392	0.566059	0.571079	0.541362	0.408419	0.431884	0.881553	0.907121	0.663588	0.643525
GUCA2B	0.237538	0.0635744	0.110028	0.0402459	-0.0287207	0.0956325	0.545238	0.166462	0.341189	0.0655261
CUL7	0.434912	0.395118	0.311387	0.41027	0.717068	0.629633	0.728326	0.763054	0.124837	0.658249
CTNNA1	0.731194	0.760839	0.698231	0.274285	0.85957	0.443555	0.72916	0.504023	0.923151	0.337918
PHKA2	0.624722	0.643579	0.556594	0.351062	0.574919	0.793657	0.68334	0.557695	0.515581	0.649037
CNTLN	0.754599	0.746732	0.604188	0.356986	0.448765	0.881903	0.751377	0.268476	0.712533	0.654844
EPHA3	0.48923	0.549507	0.293066	0.217018	0.406461	0.137564	0.690466	0.000805207	0.00787177	0.330769
HSPA5	0.578075	0.620916	0.615654	0.416919	0.690837	0.569817	0.645251	0.574988	0.578008	0.434382
DSG2	0.866448	0.368508	0.963602	0.691769	0.873891	0.63042	0.980316	0.82069	0.942891	0.44114
GEMIN8	0.564498	0.567015	0.46678	0.468977	0.609707	0.70384	0.564202	0.510693	0.495883	0.595541
OFD1	0.388122	0.451132	0.296392	0.3643	0.210741	0.729842	0.445661	0.0961069	0.223114	0.311883
GPM6B	0.825359	0.69871	0.622734	0.448336	0.995137	0.814236	0.217371	0.984237	0.371293	0.889972
MAGEC2	0.683537	0.770904	0.620896	0.221681	0.914512	0.856167	0.141449	0.297975	0.00137611	0.654086
PREX2	0.705768	0.419051	0.876818	0.132346	0.527161	0.279845	0.872149	0.34554	-0.00673635	0.517614
WDR37	0.401497	0.40083	0.319896	0.382402	0.41269	0.43635	0.580818	0.704017	0.196692	0.520928
YTHDC2	0.452212	0.603017	0.434722	0.475486	0.427421	0.668712	0.643769	0.705848	0.196294	0.399436
CTPS2	0.688062	0.75857	0.543492	0.566497	0.722099	0.575745	0.675078	0.924606	0.577293	0.818891
ATP6V1H	0.677743	0.802473	0.590255	0.515316	0.795732	0.647246	0.830662	0.547002	0.395177	0.742766
POLR2B	0.586279	0.429679	0.499055	0.564156	0.547357	0.917227	0.607384	0.911708	0.275588	0.694008
FAM214A	0.582684	0.74922	0.488287	0.543424	0.686206	0.633232	0.483814	0.165147	0.4387	0.662846
ARAP2	0.702109	0.578167	0.641032	0.40366	0.530023	0.571339	0.689898	0.714136	0.399248	0.482715
TPR	0.392029	0.29711	0.440062	0.253229	0.368772	0.636185	0.443217	0.620672	0.255232	0.548634
CP	0.727996	0.623265	0.694121	0.716144	0.769023	0.574832	0.977342	0.568853	0.244951	0.601339
KIAA0556	0.433576	0.43022	0.32212	0.289563	0.440823	0.52184	0.494379	0.412093	0.345189	0.626039
DTNBP1	0.771045	0.73397	0.741121	0.771231	0.775339	0.81173	0.635879	0.922393	0.527079	0.826665
ANO2	0.375412	0.310344	0.174564	0.0272774	0.648761	0.732555	0.257505	-0.0172624	0.116473	0.122946
C12orf4	0.535598	0.634219	0.394818	0.592066	0.696633	0.504665	0.516432	0.242378	0.279014	0.66978
SCML1	0.738135	0.713347	0.679832	0.448361	0.940906	0.832136	0.83597	0.324017	0.642743	0.745689
WWC3	0.661887	0.642057	0.601086	0.637976	0.716435	0.809938	0.707923	0.836416	0.442673	0.858735
ARHGAP6	0.556647	0.454827	0.315939	0.561688	0.594743	0.424226	0.437961	0.919153	0.557212	0.558733
FAM184B	0.365378	0.266824	0.261773	0.232148	0.299886	0.214053	0.340365	0.302314	0.429296	0.330755
MAP4	0.592471	0.502992	0.552413	0.477607	0.603531	0.41238	0.494317	0.529164	0.280143	0.596961
GOPC	0.561484	0.64582	0.505287	0.436572	0.781826	0.637123	0.597595	0.551933	0.365841	0.504617
ROS1	0.407685	0.831267	0.163907	0.351863	0.165921	0.0913171	-0.0266639	0.178156	0.0548163	0.73087
USP28	0.613971	0.625849	0.669154	0.520652	0.249804	0.592665	0.641826	0.521639	0.557141	0.696473
HDAC9	0.762607	0.798538	0.538111	0.614702	0.796421	0.645945	0.872312	0.671417	0.516359	0.866625
TSPAN17	0.457939	0.502825	0.507659	0.37179	0.38779	0.711944	0.224706	0.622932	0.191156	0.474502
NOP16	0.602785	0.482231	0.715696	0.560525	0.487158	0.550104	0.414527	0.184207	0.550909	0.554161
CC2D2A	0.592459	0.620829	0.509957	0.601192	0.308414	0.335769	0.643488	0.67612	0.45516	0.639275
RRM2B	0.46676	0.739258	0.394463	0.346182	0.673822	0.331101	0.793504	0.735005	0.275351	0.555592
ZNF800	0.393941	0.406552	0.285253	0.270065	0.519818	0.352335	0.536608	0.482706	0.312883	0.588498
TNFRSF17	0.519387	0.0136655	0.354727	0.18527	0.00266379	0.0840196	0.843719	0.367532	0.687618	0.00544214
SNX29	0.540149	0.272023	0.438312	0.256765	0.504428	0.193106	0.554011	0.662967	0.404508	0.650592
LMO3	0.687208	0.601212	0.741747	0.177166	0.785	0.840514	0.121695	0.274157	0.24792	0.535337
MRPS10	0.424419	0.471932	0.495017	0.32344	0.803403	0.488057	0.0501809	0.590742	0.281325	0.561626
GUCA1A	0.426162	0.25296	0.592485	-0.012623	0.374718	0.649794	0.276515	0.347455	0.0952371	0.45399
RSF1	0.518847	0.575518	0.452335	0.439204	0.306294	0.919545	0.752122	0.921472	0.19901	0.757355
VPS13D	0.447565	0.280952	0.442448	0.54146	0.354087	0.454595	0.534717	0.746549	0.338466	0.374262
CELF2	0.71738	0.75665	0.767812	0.068426	0.756163	0.68225	0.66173	0.836526	0.495214	0.651659
FAM120A	0.547763	0.517689	0.527325	0.292774	0.720865	0.725936	0.566527	0.529823	0.370881	0.759346
R3HDM1	0.425901	0.302043	0.398657	0.161898	0.532211	0.554492	0.306826	0.0638618	0.40268	0.462316
COL9A2	0.603007	0.613095	0.527265	0.603284	0.740877	0.471756	0.32733	0.950677	0.349017	0.440157
KITLG	0.469942	0.604703	0.477806	0.197499	0.258603	0.525974	0.398721	0.0636222	0.32536	0.585706
ERCC8	0.41786	0.4538	0.263801	0.532576	0.487844	0.459342	0.135904	0.601614	0.220961	0.601178
ADAMTS6	0.720125	0.619269	0.592268	0.43383	0.586694	0.597836	0.596814	0.116522	0.212132	0.616033
H6PD	0.397789	0.282453	0.451515	0.327229	0.698904	0.312009	0.382629	0.266529	0.306033	0.431058
VAMP3	0.659935	0.502101	0.53681	0.307522	0.713188	0.572077	0.812212	0.0557664	0.354634	0.845241
PER3	0.536436	0.538659	0.477911	0.457749	0.632682	0.379971	0.594747	0.22157	0.363389	0.419015
UTS2	0.702905	0.10177	0.877449	0.77731	0.476074	0.966669	0.965338	-0.00282503	0.76592	0.489053
TNFRSF9	0.509427	0.136347	0.307157	0.309093	0.404005	0.37194	0.589519	0.144593	0.50954	0.60724
EPN3	0.773624	0.585149	0.784973	0.414366	0.0798201	0.59082	0.751139	0.587919	0.508733	0.253452
LTBP1	0.709523	0.715925	0.767029	0.698831	0.77548	0.17775	0.431641	0.78602	0.689321	0.838709
ELN	0.503796	0.51034	0.30971	0.190643	0.644467	0.433162	0.712576	0.00502063	0.0419936	0.731985
RFC2	0.619878	0.713462	0.368668	0.524355	0.581522	0.647768	0.678441	0.970643	0.465272	0.673166
ARID1B	0.525137	0.478529	0.504331	0.635558	0.444341	0.599207	0.458437	0.459544	0.238057	0.667096
CLPTM1L	0.66694	0.64119	0.802122	0.615748	0.50818	0.328327	0.708541	0.3548	0.382301	0.73981
NEDD4L	0.678907	0.503289	0.657419	0.646937	0.830122	0.785454	0.880367	0.255244	0.190344	0.765828
FOXP3	0.0869543	0.0450508	0.0229825	-0.0183711	0.064895	0.125836	0.261866	0.285585	0.0245474	0.0636989
PPP1R3F	0.189938	0.233509	0.148278	0.177135	0.318531	0.22188	0.134304	0.352873	0.0410235	0.196714
HEXB	0.55762	0.734251	0.185097	0.469574	0.996489	0.807833	0.710213	0.277212	0.793926	0.946866
PTCD2	0.562518	0.583333	0.357447	0.50513	0.672721	0.440856	0.441154	0.614734	0.255867	0.68328
KIAA2022	0.673437	0.509937	0.645694	0.143097	0.0281615	0.397161	0.733835	0.587245	0.707907	0.777204
JKAMP	0.630536	0.577528	0.708796	0.670613	0.649883	0.70764	0.65064	0.2445	0.518167	0.627115
DKK3	0.852502	0.777367	0.856746	0.743902	0.903839	0.467966	0.865807	0.891089	0.815395	0.761775
ARHGEF5	0.815784	0.230456	0.713946	0.341976	0.841554	0.728621	0.573876	0.382211	0.531	0.561656
NFE2L3	0.815107	0.709043	0.789554	0.440322	0.767691	0.653317	0.678112	0.751157	0.593549	0.825732
MCUR1	0.679121	0.715861	0.550597	0.725323	0.404429	0.787701	0.588373	0.74988	0.463478	0.916465
LIMA1	0.796988	0.879972	0.649745	0.25984	0.758418	0.514425	0.390799	0.462494	0.657604	0.776494
LETMD1	0.674384	0.378679	0.70696	0.69179	0.310806	0.696832	0.524681	0.368017	0.794679	0.772451
SLC4A8	0.634942	0.765943	0.341362	0.518742	0.468773	0.772973	0.522883	0.241962	0.253817	0.818476
LAMC3	0.25994	0.207659	0.342659	0.0937606	0.378813	0.241852	0.155504	0.258695	0.0298784	0.697954
PTGER3	0.653558	0.66285	0.321107	0.181189	0.250268	0.908973	0.846727	0.379121	0.0228378	0.607879
TNIP3	0.481207	0.316978	0.548898	-0.0147938	0.425784	-0.104341	0.867851	0.899098	0.207936	0.408603
MAPK9	0.757519	0.804988	0.718092	0.768244	0.830801	0.77245	0.554651	0.339945	0.583622	0.836726
COL23A1	0.647166	0.380713	0.233843	-0.0488168	0.124968	0.710851	0.722762	0.45569	0.172895	0.729711
BCAR1	0.400722	0.301716	0.477181	0.103858	0.111446	0.402745	0.507944	0.680511	0.211774	0.426984
FAM160A2	0.578304	0.285508	0.310816	0.516684	0.432229	0.632755	0.417607	0.746242	0.332597	0.537838
HERPUD1	0.489719	0.629145	0.335308	0.314569	0.589565	0.293495	0.709145	0.217258	0.507061	0.563577
HOMER3	0.677265	0.533817	0.614799	0.416905	0.586953	0.802278	0.474707	0.559966	0.422067	0.707568
RAD51	0.440069	0.410863	0.410771	0.383541	0.340737	0.54873	0.384988	0.528214	0.464438	0.582457
POLQ	0.407925	0.47913	0.506883	0.187759	0.419912	0.503801	0.223475	0.430827	0.389127	0.2253
PIK3CB	0.635489	0.450707	0.383909	0.529726	0.536253	0.711678	0.720821	0.632986	0.406866	0.598852
CYBA	0.811092	0.78692	0.651464	0.910309	0.81431	0.868058	0.793779	0.273362	0.493876	0.729227
HEBP2	0.594235	0.434871	0.372762	0.389068	0.0719269	0.516319	0.536435	0.525877	0.510575	0.430239
MPHOSPH9	0.479124	0.472841	0.389964	0.389134	0.554976	0.639659	0.235883	0.189285	0.204731	0.521955
PLEKHA5	0.680985	0.621325	0.451313	0.729027	0.830019	0.603327	0.658299	0.685304	0.405845	0.87638
PRSS8	0.810126	0.696081	0.745224	0.321478	0.114753	0.643256	0.596265	0.654019	0.551068	0.152566
SIKE1	0.410624	0.383677	0.459377	0.266986	0.590693	0.462732	0.207895	0.514393	0.146905	0.580973
RRP12	0.549486	0.465812	0.434046	0.582905	0.813738	0.601022	0.453964	0.384563	0.489903	0.475018
FNIP2	0.706619	0.419305	0.723307	0.875751	0.581085	0.378822	0.614475	0.797142	0.63021	0.38637
MSMO1	0.607454	0.628693	0.613199	0.471932	0.638695	0.616497	0.223065	0.707917	0.587674	0.517139
TTC17	0.546056	0.606169	0.550429	0.398906	0.643788	0.663484	0.474716	0.586251	0.357679	0.489987
ALX4	0.0578635	0.0537494	0.0132854	0.0572498	-0.0404633	0.06324	0.226057	0.280183	0.0741171	0.0736984
FSTL4	0.316631	0.177606	0.416932	0.383056	0.28918	0.459805	0.287216	0.264353	0.0250163	0.534598
FOXN3	0.585968	0.412289	0.660848	0.455293	0.445676	0.614477	0.354088	0.503892	0.531057	0.672013
AKR7A2	0.596531	0.574108	0.610012	0.752421	0.72537	0.313542	0.634728	0.538884	0.651832	0.566647
MRTO4	0.450604	0.458168	0.418813	0.40451	0.561365	0.402488	0.407591	0.170245	0.269416	0.583419
NNAT	0.363471	0.155987	0.365777	-0.00546349	0.0533705	0.777063	0.348885	0.0504665	0.110364	0.396264
USE1	0.503914	0.518602	0.305666	0.338777	0.601861	0.719815	0.821733	0.693701	0.439132	0.504967
MCF2L2	0.340089	-0.011969	0.507076	-0.000755312	0.268664	0.835849	-0.0830502	-0.0476341	0.103515	0.0971394
NRIP2	0.276938	0.137344	0.393855	0.138495	0.28062	0.410731	0.382985	-0.0786921	0.0109685	0.263812
LAMA3	0.371565	0.290698	0.254972	0.107915	0.123404	0.368756	0.252029	0.779338	0.159519	0.22401
AP5M1	0.536594	0.544487	0.589803	0.499019	0.556123	0.457695	0.60572	0.627288	0.331528	0.638732
ANAPC4	0.569032	0.583375	0.643764	0.480553	0.740663	0.377202	0.713789	0.638869	0.3421	0.76206
KCNQ1	0.61415	0.313151	0.322998	0.433419	0.11421	0.320944	0.495861	0.335514	0.474979	0.156457
TRAPPC3	0.548188	0.455701	0.480518	0.636784	0.427827	0.867977	0.280619	0.121456	0.354935	0.638752
THRAP3	0.233699	0.0265826	0.138371	0.218335	0.166577	0.427507	0.34452	0.074342	0.226626	0.510058
ENTPD2	0.54243	0.436813	0.431561	0.501651	0.130094	0.403886	0.713545	0.1497	0.351638	0.249172
ARID4B	0.476281	0.395259	0.34881	0.412448	0.291307	0.836565	0.694384	0.337355	0.187427	0.648771
OPN3	0.690723	0.689386	0.645836	0.532561	0.911124	0.616644	0.733376	0.745041	0.618349	0.797046
SDCCAG8	0.627613	0.634689	0.625762	0.520686	0.511047	0.72863	0.630899	0.839827	0.451478	0.667584
PTPRN	0.354085	0.0376957	0.626288	0.0736699	0.271782	0.0620781	0.56395	0.24299	-0.010839	0.164513
HHAT	0.54719	0.588171	0.609815	0.443066	0.6879	0.590979	0.293335	0.628714	0.237904	0.588148
KIF1B	0.659099	0.544818	0.48894	0.479921	0.4588	0.758834	0.778675	0.504127	0.303788	0.777927
FOXC1	0.818753	0.870972	0.86139	0.720724	0.875905	0.762698	0.761201	0.990783	0.621712	0.834154
TBC1D22A	0.636985	0.550507	0.553388	0.569451	0.528281	0.729264	0.72623	0.544403	0.574375	0.708551
SYNE2	0.488042	0.488268	0.462938	0.370638	0.512882	0.307405	0.436483	0.752735	0.342082	0.494537
PLEKHH1	0.63773	0.38681	0.340176	0.534525	0.382699	0.417795	0.533076	0.185283	0.502478	0.657333
ATP9A	0.72462	0.579058	0.786406	0.747285	0.792874	0.779184	0.540766	0.345161	0.634372	0.611296
SPO11	0.0420109	0.0189108	-0.0783992	-0.0413142	0.0148954	0.250183	0.0832477	-0.0664511	0.0333763	0.502646
CBLN4	0.559339	0.592907	0.309442	0.0318063	0.439761	0.159682	0.157494	0.388102	0.0563962	0.920196
CHRDL2	0.338552	0.5834	0.0097115	0.280885	-0.0284336	0.0475304	0.328968	-0.136496	0.0531103	0.797235
FAM168A	0.529086	0.373287	0.35241	0.438577	0.526309	0.528159	0.603409	0.499434	0.138221	0.643187
RELT	0.336136	0.249208	0.365896	0.273702	0.441437	0.501243	0.434935	0.211978	0.183537	0.530909
GALC	0.741871	0.573773	0.676877	0.653357	0.437764	0.862034	0.84538	0.869701	0.856354	0.76928
NOP58	0.53187	0.4632	0.507146	0.360886	0.495374	0.156224	0.418303	0.158592	0.328535	0.652183
SZRD1	0.433213	0.584593	0.364986	0.239913	0.564739	0.547062	0.622455	0.615985	0.222924	0.669172
KCNH2	0.680756	0.666082	0.667351	0.460748	0.873147	0.656982	0.566862	0.144661	0.591813	0.747585
CUL1	0.633847	0.576309	0.653676	0.423174	0.731644	0.581128	0.777461	0.652677	0.670828	0.8882
FAM114A2	0.588013	0.706822	0.338892	0.504703	0.640685	0.639869	0.72253	0.145768	0.298069	0.833566
CYFIP2	0.750398	0.771316	0.748222	0.526797	0.745265	0.558291	0.846073	0.910068	0.671356	0.859051
TAB2	0.568415	0.723707	0.578649	0.532632	0.564496	0.532296	0.395616	0.164971	0.438806	0.58486
GINM1	0.547179	0.604957	0.473896	0.534845	0.78984	0.633945	0.306595	0.0636687	0.236891	0.646064
EIF2AK2	0.430013	0.506644	0.186496	0.303469	0.674314	0.797823	0.223966	0.454989	0.366302	0.526097
USP36	0.450511	0.389689	0.469564	0.17967	0.694539	0.647359	0.620099	0.266637	0.253803	0.586287
KMT2C	0.546609	0.669918	0.650285	0.443556	0.407745	0.534388	0.525506	0.906769	0.296503	0.679955
MCOLN3	0.661008	0.67848	0.534679	0.384487	0.67486	0.629844	0.738881	0.689182	0.685719	0.708759
PUM2	0.584022	0.620126	0.548428	0.539175	0.608651	0.598276	0.434016	0.617196	0.335987	0.781531
MRPL43	0.577899	0.258496	0.685434	0.629372	0.364184	0.839902	0.643804	0.584954	0.47499	0.638579
ITIH4	0.272446	0.131786	0.218646	0.0888432	0.0149388	0.346081	0.113082	0.141427	0.0838268	0.318954
ITIH1	0.399896	0.0358788	0.468031	0.217029	0.739781	0.113969	0.166795	-0.0259602	-0.00945033	0.0674919
C4orf27	0.58758	0.599212	0.759111	0.24688	0.700335	0.590129	0.397393	0.152849	0.522849	0.673546
ZFR	0.273382	0.399889	0.279286	0.0954879	0.461229	0.216465	0.0784131	0.610316	0.216241	0.383539
ZNF280C	0.489305	0.524281	0.434064	0.303768	0.291665	0.412508	0.594518	0.746538	0.213944	0.673244
NPFFR2	0.564868	0.315658	0.492766	0.328602	-0.0546193	0.678821	0.4277	0.444696	-0.0386227	0.765079
PHF21B	0.722541	0.770973	0.595087	0.0346367	0.490261	0.760655	0.0288254	-0.0282758	0.00061518	0.570363
TRAF1	0.628288	0.347387	0.623744	0.107604	0.789426	0.253105	0.714341	0.21907	0.517639	0.679165
RC3H2	0.587374	0.574506	0.599677	0.682815	0.532507	0.544212	0.781157	0.727604	0.367985	0.579084
IL17RB	0.802601	0.856801	0.810178	0.716615	0.795381	0.600508	0.438398	0.737881	0.869151	0.491591
TRAF3IP2	0.658009	0.545476	0.721549	0.613366	0.799605	0.358618	0.733717	0.454568	0.53673	0.596595
GYG2	0.780496	0.750958	0.664161	0.434073	0.944336	0.778712	0.613513	0.614929	0.664128	0.765006
DCBLD2	0.723723	0.751864	0.695047	0.531258	0.780277	0.450869	0.778374	0.805973	0.497574	0.945123
SERPINB3	0.666253	0.678404	0.732791	0.397321	-0.0770999	0.412083	0.574726	0.626077	0.701532	0.224034
SOAT1	0.693255	0.598115	0.631096	0.642818	0.784354	0.260922	0.78094	0.649917	0.503448	0.757901
PKP2	0.744866	0.591399	0.530801	0.517013	0.19331	0.614802	0.194725	0.844018	0.49294	0.305904
MSH4	0.183742	0.107264	0.0996532	-0.00783119	0.358963	0.161671	0.251911	-0.0882891	0.154081	0.121006
F7	0.414182	0.243466	0.450374	0.230678	0.664253	0.308032	0.372206	-0.0594521	0.377554	0.485168
GDI2	0.788492	0.855992	0.747169	0.677997	0.687552	0.647611	0.775275	0.812766	0.422829	0.677383
PRDM1	0.617819	0.487235	0.547526	0.415592	0.729037	0.653678	0.578534	0.471829	0.364687	0.46708
ATG5	0.540633	0.499811	0.635377	0.4865	0.706362	0.825975	0.57153	0.262341	0.182894	0.496917
TMCC3	0.785568	0.634195	0.758243	0.70722	0.509711	0.789929	0.689137	0.88076	0.781257	0.710624
PITHD1	0.487185	0.479613	0.587755	0.397841	0.634904	0.427248	0.477978	0.014047	0.391734	0.477322
MTA3	0.533187	0.599761	0.463406	0.45157	0.234024	0.78268	0.416729	0.129116	0.39533	0.720685
USP13	0.771681	0.702322	0.7266	0.512414	0.325503	0.760509	0.804306	0.70474	0.58892	0.681673
ATP11B	0.754857	0.657792	0.910376	0.609535	0.52333	0.698631	0.525277	0.591307	0.588855	0.861325
LAMC2	0.807466	0.455188	0.80298	0.42392	0.176416	0.573632	0.836157	0.856952	0.613544	0.610233
CDK14	0.689655	0.684624	0.615679	0.406365	0.536292	0.679171	0.713833	0.470919	0.172744	0.787291
SEC61A1	0.483123	0.648642	0.198995	0.584687	0.584617	0.596271	0.585729	0.581785	0.237419	0.620691
PPP1R12A	0.572362	0.539101	0.522407	0.61789	0.643525	0.729735	0.584395	0.761297	0.39326	0.801728
RASGRF1	0.312002	0.03876	0.399391	0.221554	0.136458	0.418327	0.38434	0.116252	0.135563	0.16681
CAMK2B	0.34653	0.429866	0.173696	0.0901897	0.271063	0.661576	0.473816	0.109808	0.241598	0.170171
CROCC	0.206773	0.101973	0.215847	0.0978387	0.397378	0.213023	0.129551	0.882459	0.0770885	0.257855
POLR3E	0.567065	0.456129	0.585125	0.537765	0.755548	0.781196	0.730515	0.266587	0.432299	0.516702
ATP2B4	0.654845	0.670267	0.741559	0.564892	0.670649	0.667544	0.697028	0.551129	0.208355	0.764908
ZC3H11A	0.304417	0.294346	0.266098	0.212373	0.192213	0.334696	0.30947	0.471095	0.154021	0.476462
RIOK2	0.565782	0.675421	0.29441	0.565356	0.648253	0.851045	0.399082	0.809147	0.264861	0.723394
YIPF1	0.618553	0.595523	0.685173	0.521223	0.667542	0.682124	0.678853	0.0144748	0.389396	0.781144
NDC1	0.624899	0.520798	0.712253	0.413566	0.563169	0.687502	0.609077	0.219342	0.569513	0.683918
DGKG	0.618174	0.642407	0.585833	0.377235	0.583201	0.714197	0.717091	0.672279	0.306311	0.722617
FLYWCH1	0.370904	0.618974	0.252069	0.21762	0.360488	0.483599	0.342584	0.0160189	0.174673	0.593856
UNKL	0.441208	0.241651	0.485199	0.379429	0.515434	0.519465	0.498871	0.342688	0.263733	0.493362
TBXAS1	0.600223	0.367633	0.41323	0.377248	0.707394	0.347141	0.476465	0.563114	0.621364	0.287448
PARP12	0.669722	0.67375	0.65631	0.46678	0.47312	0.782704	0.734392	0.60831	0.631486	0.642235
ALDH18A1	0.702783	0.59662	0.661074	0.534881	0.810304	0.6815	0.848266	0.654437	0.698339	0.805434
TARBP1	0.496649	0.310739	0.564145	0.351801	0.46886	0.472492	0.466839	0.581182	0.341324	0.5732
PET112	0.603363	0.384608	0.619434	0.562502	0.556961	0.423533	0.659321	0.638094	0.486929	0.796191
MXD1	0.753127	0.673744	0.679531	0.589839	0.426034	0.608859	0.833438	0.711055	0.574497	0.484778
CDK17	0.613535	0.576754	0.474904	0.676515	0.639665	0.457501	0.697777	0.175879	0.35606	0.83564
SLC2A3	0.609451	0.569946	0.590855	0.427267	0.657314	0.121954	0.767901	-0.0270409	0.402722	0.834753
PSD	0.0800547	0.0271534	0.0592609	0.0110467	0.181049	0.00424137	-0.0576412	0.237241	0.198634	0.144223
CTDP1	0.447403	0.397671	0.536964	0.515804	0.277316	0.476069	0.241962	0.208066	0.234986	0.449446
YBX3	0.663855	0.83567	0.637964	0.852978	0.525559	0.961717	0.925901	0.398996	0.640624	0.58227
STYK1	0.761558	0.566232	0.597093	0.790915	0.747398	0.622275	0.773587	0.774475	0.45551	0.731602
WNK1	0.529466	0.486366	0.561127	0.500826	0.277093	0.437545	0.610782	0.523455	0.329998	0.817285
RPS17P5	0.452369	0.387353	0.381477	0.410104	0.410414	0.478492	0.598747	0.37535	0.443822	0.642561
CCAR1	0.329303	0.287852	0.271209	0.241203	0.452056	0.527607	0.391907	0.0263487	0.169209	0.225816
OGFR	0.358258	0.406862	0.216375	0.20786	0.541162	0.374193	0.476526	0.00281198	0.237496	0.454147
GNA15	0.777239	0.661938	0.824068	0.64549	0.542991	0.670519	0.876408	0.491581	0.525375	0.289753
CREB3L3	0.212863	0.00632166	0.210751	0.119956	0.223288	0.0230063	0.303654	0.289508	0.180126	0.0229377
PIGV	0.644862	0.537048	0.733908	0.682031	0.825761	0.480756	0.508323	0.665917	0.508448	0.833402
PTPRU	0.46332	0.501989	0.570881	0.274802	0.455007	0.36893	0.582851	0.171049	0.327056	0.563964
SNRNP40	0.507362	0.261249	0.58314	0.435082	0.646902	0.669617	0.761318	0.496964	0.317624	0.508472
RIMBP2	0.562593	0.0408024	0.493553	0.358354	0.179675	0.591783	0.246359	-0.0150152	0.289189	0.781829
COL11A1	0.779906	0.840982	0.863413	0.109566	0.50717	0.746827	0.720984	0.0862238	0.0812113	0.867396
QSER1	0.667458	0.652058	0.593119	0.328799	0.46328	0.780157	0.242276	0.724215	0.464367	0.820991
MPC1	0.649706	0.531412	0.621543	0.664025	0.684473	0.747621	0.505224	0.953831	0.652914	0.704411
ACAA1	0.745708	0.758931	0.656964	0.824176	0.719702	0.562273	0.896815	0.437843	0.581855	0.594567
BCAT1	0.719189	0.578999	0.556362	0.714996	0.464002	0.369373	0.860312	0.878563	0.776309	0.579861
HDAC7	0.40756	0.335438	0.233035	0.342827	0.320442	0.413018	0.22371	0.44618	0.136588	0.488664
LZTS1	0.384239	0.270794	0.10603	0.153621	0.197129	0.44093	0.616383	0.0415162	0.147695	0.386549
PRDM6	0.694723	0.738253	0.40605	0.330722	0.513744	0.601207	0.421631	-0.0576563	-0.0136852	0.704295
WNT8A	0.0458249	0.0416136	0.102056	0.0409754	0.0585863	0.0194749	0.150309	-0.0221422	0.0224992	0.0227359
SPAG4	0.594216	0.463752	0.443372	0.300053	0.535606	0.57948	0.435749	0.502389	0.591424	0.799317
NCKAP1	0.964652	0.640519	0.989883	0.313788	0.532387	0.687486	0.991136	0.697551	0.928666	0.33701
MRPS35	0.748106	0.659453	0.796492	0.809542	0.680443	0.716868	0.571311	0.988365	0.648426	0.517498
GUCY1B3	0.779975	0.800477	0.715442	0.643874	0.793314	0.535944	0.780332	0.887477	0.0841356	0.710981
SFSWAP	0.310334	0.317116	0.353392	0.375164	0.33999	0.414928	0.113502	0.154611	0.159743	0.326675
TNK2	0.185446	0.168042	0.0734781	0.181601	0.165649	0.354491	0.181096	0.183784	0.0666763	0.0150196
MON2	0.398364	0.57327	0.265639	0.56872	0.159621	0.313692	0.466912	0.272995	0.121854	0.506459
CDH3	0.780456	0.623657	0.887292	0.685867	0.565	0.837201	0.599628	0.885616	0.610789	0.464065
ARSF	0.170895	0.0709978	0.0280765	0.0842978	0.141084	0.202107	0.577778	0.207585	0.0786095	0.0440967
GPBP1	0.58329	0.683985	0.589993	0.631266	0.196143	0.71732	0.338953	0.693563	0.310838	0.60648
DGAT2	0.706616	0.644176	0.5875	0.457151	0.504741	0.508871	0.632181	0.280008	0.655186	0.614192
ZNF112	0.433996	0.341798	0.216243	0.368273	0.544575	0.824082	0.418119	0.46696	0.355314	0.612712
LTK	0.480325	0.335027	0.608301	0.619791	0.326113	0.266145	0.41474	0.731553	0.382094	0.439381
ELMO2	0.606344	0.566356	0.571545	0.362207	0.711993	0.534767	0.510333	0.443266	0.638762	0.479597
WAPAL	0.547759	0.38174	0.589462	0.514039	0.627796	0.493471	0.766567	0.6873	0.472745	0.69307
VMP1	0.566372	0.557394	0.509067	0.324408	0.775057	0.669319	0.491696	0.639199	0.327578	0.628307
APPBP2	0.5792	0.607569	0.635917	0.489189	0.741048	0.839689	0.361439	0.471146	0.255227	0.357447
SEZ6	0.318786	0.0450968	0.346739	0.0945102	0.125032	0.0618065	0.381492	-0.077916	0.0203031	0.0670628
SLC6A16	0.57595	0.700147	0.498599	0.0280748	0.473808	0.691335	0.298269	0.435379	0.18497	0.688436
SPHK2	0.446283	0.471737	0.255538	0.483172	0.468054	0.56107	0.396068	0.501435	0.380172	0.611222
RPL18	0.216671	0.222552	0.175927	0.213226	0.443185	0.0889951	0.296807	0.310496	0.118277	0.0775017
CA11	0.486411	0.377527	0.450311	0.223088	0.292544	0.664056	0.488725	0.924297	0.237199	0.791398
ISOC2	0.441973	0.477242	0.335237	0.557862	0.451301	0.494167	0.406018	0.0675324	0.252681	0.428491
U2AF2	0.250597	0.429493	0.0619036	0.342399	0.0957272	0.399041	0.428177	0.466928	0.244416	0.294643
EPN1	0.279205	0.291671	0.13713	0.201284	0.220123	0.209103	0.627025	0.308469	0.0925798	0.251001
MED29	0.480613	0.710434	0.455705	0.341628	0.456001	0.825603	0.786857	0.702002	0.129356	0.64305
AHRR	0.62276	0.628828	0.499261	0.504169	0.748048	0.648573	0.552317	0.579311	0.554881	0.786153
GSC2	0.0962906	0.116257	0.0705289	0.435116	-0.0804032	0.108269	-0.0827266	-0.0288844	0.0203521	-0.0175998
ZNF275	0.592962	0.600623	0.616916	0.449453	0.653184	0.611894	0.795271	0.369871	0.506917	0.778612
MTMR1	0.616119	0.488629	0.697406	0.440772	0.843818	0.416916	0.27505	0.573926	0.548772	0.721759
GPC1	0.686148	0.649722	0.679097	0.736366	0.494201	0.461654	0.59501	0.748214	0.362452	0.773301
ADCK1	0.482671	0.563277	0.402963	0.500041	0.451998	0.250639	0.595776	0.543089	0.327719	0.300166
HAGH	0.6349	0.758282	0.433174	0.639682	0.464369	0.641417	0.622376	0.364317	0.503843	0.625715
RNF4	0.622946	0.517733	0.699087	0.652741	0.885824	0.817545	0.599641	0.705026	0.455568	0.685236
CASP8	0.672837	0.523206	0.489375	0.538133	0.61969	0.741151	0.713433	0.613035	0.427255	0.530713
LIMCH1	0.69893	0.705745	0.823217	0.651215	0.521898	0.78577	0.427432	0.881388	0.56286	0.710049
ASUN	0.652631	0.737553	0.656767	0.578866	0.432932	0.691981	0.821403	0.74419	0.377791	0.838991
TM7SF3	0.724619	0.728832	0.685408	0.691978	0.67608	0.761082	0.798977	0.777346	0.541799	0.651155
DLX3	0.443401	0.389076	0.507184	0.158897	-0.0496901	0.590692	0.172991	0.390476	0.109348	0.470347
SPA17	0.466112	0.336754	0.39335	0.451221	0.723881	0.674455	0.830814	0.66222	0.281684	0.618085
TSPAN32	0.12156	0.119166	0.00625794	0.312494	0.0561667	0.0243005	0.145382	0.542537	0.0293707	0.31706
WISP2	0.569528	0.336131	0.657279	0.123388	-0.0746661	0.117135	0.36038	0.185479	0.0460258	0.797525
DMRT3	0.698023	0.813693	0.518534	0.0533258	-0.0798704	0.425815	0.148172	0.622153	0.800132	0.895334
ST3GAL6	0.804642	0.752704	0.679451	0.578396	0.916265	0.556083	0.654539	0.8485	0.676169	0.858493
ATP2C2	0.796888	0.712512	0.544034	0.559054	-0.0605897	0.531758	0.63105	0.887313	0.49668	0.482755
NGFR	0.714545	0.270805	0.885154	0.534927	0.770086	0.793635	0.759149	0.755994	0.0490168	0.342657
CDON	0.538221	0.38394	0.315177	0.49877	0.256464	0.566502	0.55165	0.230014	0.213087	0.477947
TAF2	0.596983	0.614367	0.649061	0.382329	0.788878	0.654247	0.658734	0.884654	0.325626	0.530071
HIPK2	0.62495	0.545565	0.635311	0.569345	0.31213	0.406903	0.894042	0.34112	0.545221	0.770991
TNPO3	0.498966	0.484525	0.346576	0.56123	0.485767	0.573065	0.705115	0.73031	0.496384	0.761049
RFXANK	0.527264	0.665759	0.489753	0.510145	0.396979	0.709695	0.370527	0.616548	0.319229	0.5951
TMEM161A	0.546284	0.617568	0.497658	0.480302	0.491614	0.577642	0.431732	0.32934	0.35679	0.658763
LPAR2	0.585465	0.501208	0.40831	0.305814	0.209186	0.585205	0.585344	0.417778	0.277277	0.336152
CTSA	0.573805	0.522715	0.508384	0.317158	0.671883	0.425421	0.321919	0.514758	0.306589	0.573334
SUGP2	0.482031	0.267513	0.399449	0.313354	0.503316	0.785864	0.356728	0.118068	0.291473	0.419063
SLC12A2	0.658462	0.567765	0.659817	0.438439	0.535803	0.392389	0.197478	0.422968	0.960313	0.638776
SNX24	0.793685	0.779699	0.630907	0.614647	0.737013	0.743038	0.869769	0.770571	0.707591	0.856002
EYA2	0.755329	0.735421	0.755834	0.744236	0.645863	0.578723	0.620338	0.270474	0.646814	0.734319
CNN2	0.48011	0.384876	0.493673	0.387332	0.0158125	0.481236	0.51654	0.884872	0.277704	0.375666
ABCA7	0.452142	0.424962	0.439428	0.252035	0.393888	0.39703	0.680951	0.76067	0.388046	0.265919
SNCAIP	0.66314	0.686289	0.685759	0.237678	0.0804647	0.223509	0.0473042	0.324843	0.669519	0.807881
DDX20	0.520321	0.571899	0.357335	0.418115	0.789844	0.709575	0.379224	0.706232	0.210073	0.67612
BTBD1	0.595019	0.706074	0.369896	0.641791	0.450702	0.485916	0.6749	0.788445	0.523154	0.684438
FAR2	0.71807	0.655209	0.534877	0.664228	0.618219	0.537367	0.688063	0.961407	0.693486	0.71826
BCAS1	0.773684	0.6414	0.562155	0.630738	0.615966	0.698972	0.665077	0.795367	0.592589	0.535994
POU1F1	0.773065	-0.0605602	-0.0332261	-0.0427099	-0.0518985	-0.0508504	0.985798	0.0624482	0.0871039	-0.0406579
CHI3L2	0.684317	0.793151	0.665157	0.668568	0.426625	0.0881589	0.660922	0.372542	0.444857	0.612373
SBNO2	0.461618	0.398735	0.339827	0.387546	0.740199	0.649941	0.800175	0.634115	0.241169	0.637416
PMS1	0.4435	0.258778	0.334777	0.163318	0.316105	0.641808	0.522081	0.701908	0.226077	0.508911
HMG20B	0.603266	0.568913	0.488422	0.605897	0.721834	0.673275	0.637372	0.691253	0.333691	0.643997
CALCRL	0.578225	0.318711	0.607486	0.364115	0.273634	0.340784	0.584894	1.03964e-05	-0.0160034	0.778211
TAF11	0.717743	0.600901	0.441015	0.750335	0.713685	0.793962	0.653115	0.872555	0.508254	0.68521
ANKS1A	0.685647	0.54467	0.601815	0.730844	0.76509	0.677344	0.631865	0.581736	0.530709	0.614096
AP3D1	0.452445	0.395283	0.45172	0.312961	0.434591	0.543171	0.488726	0.507999	0.192576	0.804704
ZNF76	0.255098	0.299289	0.246089	0.212298	0.308208	0.231037	0.120717	0.561231	0.107893	0.206672
SLC9A3R2	0.280596	0.19255	0.404731	0.255532	0.0900477	0.218027	0.412182	0.275209	0.186094	0.448291
NTHL1	0.663401	0.588457	0.614988	0.455465	0.625028	0.571076	0.558091	0.454692	0.747608	0.809349
UHRF1BP1	0.592114	0.612835	0.510987	0.493295	0.716262	0.656712	0.292756	0.755921	0.225058	0.546392
GNAI3	0.569553	0.662067	0.503021	0.41532	0.730848	0.738626	0.524956	0.471093	0.469154	0.853998
IPO5	0.701723	0.587264	0.647958	0.581787	0.774016	0.564367	0.750458	0.848175	0.691343	0.651322
OAT	0.722211	0.619868	0.439152	0.740381	0.789896	0.774045	0.949037	0.450651	0.571676	0.728286
WDR3	0.457204	0.60485	0.328913	0.244963	0.704978	0.568406	0.337815	0.892975	0.197695	0.333872
PKN2	0.565254	0.628525	0.54298	0.53616	0.63886	0.705571	0.761756	0.530327	0.313833	0.481836
WDR18	0.524231	0.594361	0.584816	0.513327	0.721913	0.36118	0.711202	0.863501	0.282711	0.387504
TRAM2	0.713628	0.563466	0.724625	0.524299	0.435976	0.483592	0.825959	0.467901	0.609126	0.891162
NTN1	0.478387	0.366252	0.669033	0.30716	0.350772	0.513768	0.102691	0.370018	0.112012	0.542572
GLP2R	0.0670074	0.0601778	0.169666	0.0592338	-0.00666018	0.0147125	-0.0249457	-0.0813797	-0.00914084	0.180578
MCM10	0.472941	0.469989	0.271161	0.287576	0.495301	0.431027	0.726433	0.694595	0.232031	0.336845
DGKA	0.554968	0.401911	0.467951	0.46124	0.429672	0.771982	0.847095	0.672123	0.212298	0.67289
ERBB3	0.508461	0.452057	0.496332	0.446683	0.435578	0.341015	0.600037	0.374839	0.138919	0.237314
ROPN1	0.828665	0.925494	0.608679	0.401692	0.675303	0.310956	0.367721	0.80999	-0.0279777	0.79764
ANKRD44	0.717569	0.549774	0.558196	0.357769	0.712752	0.451697	0.665469	0.242548	0.600681	0.701852
KARS	0.592147	0.437127	0.59692	0.414382	0.825793	0.686363	0.837286	0.724227	0.536579	0.390854
PDIA5	0.682739	0.711181	0.517982	0.694485	0.706161	0.666603	0.902091	0.610598	0.355241	0.788501
TBC1D22B	0.432967	0.539685	0.510581	0.329861	0.562984	0.347799	0.299019	0.0199518	0.169472	0.378386
NDUFB4	0.353475	0.322345	0.325638	0.203223	0.484086	0.390979	0.584168	-0.0391021	0.33048	0.381124
SPEN	0.386386	0.171933	0.508163	0.586333	0.145918	0.601499	0.412151	0.264137	0.117787	0.399866
MYLK	0.670766	0.686396	0.639565	0.499659	0.422292	0.41174	0.759626	0.734076	0.448833	0.758677
ZC3H15	0.931003	0.360153	0.654856	0.34929	0.697658	0.581803	0.658748	0.707469	0.982609	0.671885
MAP2K4	0.545345	0.655033	0.472455	0.689689	0.139877	0.67976	0.472625	0.600575	0.452444	0.51655
TMEM206	0.687251	0.706455	0.620843	0.447523	0.644977	0.553191	0.555824	0.693282	0.372602	0.84224
SNAP91	0.54415	0.680224	0.154532	0.0611201	0.468539	0.845486	0.16095	0.479194	0.123426	0.796864
SLK	0.638095	0.618383	0.531438	0.674134	0.459245	0.783877	0.630093	0.829841	0.366386	0.521763
CYB5R4	0.502266	0.616773	0.468384	0.378892	0.415034	0.338223	0.512493	0.190702	0.264963	0.77732
COL17A1	0.730961	0.34184	0.809926	0.594817	0.0240846	0.336738	0.447336	0.50688	0.546336	0.569011
GSTO2	0.796672	0.703814	0.746708	0.532812	0.341001	0.681361	0.688486	0.834699	0.774592	0.339891
SEC61A2	0.447732	0.531323	0.214911	0.115782	0.308214	0.572985	0.456899	0.735891	0.225169	0.471357
PRKCQ	0.676538	0.679958	0.716878	0.829471	0.482486	0.440272	0.52588	0.0376728	0.548525	0.241411
TLE2	0.667186	0.626179	0.674259	0.588551	0.599902	0.434861	0.461612	0.829296	0.54129	0.830706
ASB1	0.473252	0.282369	0.39234	0.386767	0.467161	0.462998	0.384768	0.606403	0.184522	0.615633
FAM107B	0.755551	0.719759	0.693678	0.746589	0.729617	0.899327	0.747203	0.6691	0.56815	0.802759
ME1	0.814671	0.795825	0.79774	0.792825	0.805816	0.868206	0.860674	0.142481	0.757584	0.84648
TBC1D1	0.653862	0.445977	0.446369	0.739219	0.538254	0.550491	0.564458	0.7185	0.574612	0.800001
CDK13	0.435615	0.52653	0.406763	0.35646	0.31004	0.418897	0.45198	0.371487	0.251884	0.656533
MTHFD2	0.767766	0.373451	0.507696	0.628092	0.474743	0.541614	0.505116	0.205402	0.401167	0.704032
SLC9A7	0.743614	0.711185	0.621972	0.652744	0.896111	0.454483	0.715287	0.927447	0.582194	0.6659
FOXJ2	0.49305	0.524011	0.50144	0.433175	0.542261	0.455234	0.555663	0.719314	0.245551	0.429055
PDE4A	0.392019	0.21169	0.237658	0.540362	0.193069	0.255795	0.697976	0.685233	0.199894	0.572956
PPP2R5A	0.608126	0.569401	0.646902	0.571971	0.69359	0.688798	0.330869	0.808608	0.270243	0.355793
CTNNA2	0.596518	0.370409	0.66828	0.267448	0.669953	0.761326	0.157922	0.0604247	0.503459	0.684623
ELAVL1	0.679036	0.620523	0.60106	0.362374	0.771873	0.773188	0.705791	0.494723	0.414877	0.506327
TIE1	0.230666	0.127318	0.0788484	-0.00510476	0.443382	0.248266	0.372257	0.132128	0.0307165	0.632242
DIP2B	0.421742	0.427589	0.292171	0.617207	0.250114	0.615381	0.733188	0.584348	0.192404	0.660129
SMARCD1	0.522536	0.474871	0.514234	0.480579	0.706007	0.470982	0.536818	0.431767	0.310162	0.63693
KDM4A	0.484629	0.530337	0.40893	0.315893	0.260494	0.837176	0.329652	0.394058	0.373955	0.697904
NFYC	0.551284	0.586284	0.462034	0.547744	0.371061	0.582889	0.60697	0.740716	0.359057	0.662496
ZMYND12	0.552267	0.561377	0.337632	0.671834	0.603857	0.750259	0.752999	0.857039	0.317021	0.396221
SLC9A3	0.144564	-0.0182859	0.0832081	0.0567173	0.0137048	-0.0268322	0.155286	0.218854	0.26304	0.0554246
NGEF	0.543005	0.545391	0.576736	0.288713	0.627295	0.381168	0.205099	0.599556	0.32521	0.319741
ASPM	0.427239	0.434258	0.420412	0.163553	0.442271	0.68303	0.562719	0.339327	0.378155	0.612736
CD84	0.394838	0.0977468	0.453667	0.108271	0.334222	0.419676	0.690473	0.167573	0.306162	0.152065
ELOVL1	0.714582	0.363302	0.551425	0.403844	0.77979	0.789329	0.902976	0.908399	0.433938	0.82863
SPI1	0.280975	0.24062	0.106816	0.199709	0.225495	0.513984	0.626401	0.00120927	0.18506	0.528935
ZNRD1	0.452592	0.348933	0.541947	0.334316	0.356151	0.478869	0.498811	0.146397	0.320017	0.506894
MPPED2	0.757444	0.5232	0.614379	0.768517	0.78315	0.795054	0.471093	0.925259	0.449221	0.758811
CLDN18	0.883392	0.599854	0.866235	0.77526	0.625166	0.759592	-0.0278048	0.952825	0.82666	0.234371
ZBTB11	0.423682	0.633807	0.404239	0.298551	0.41947	0.438524	0.711204	0.0871468	0.252569	0.43655
ATXN3	0.514795	0.549198	0.392083	0.513714	0.562876	0.605953	0.426712	0.676771	0.326344	0.62222
GOLGA5	0.655733	0.6082	0.742512	0.569749	0.807703	0.672126	0.565057	0.240505	0.690522	0.759949
FGFR2	0.736807	0.644691	0.847018	0.610446	0.234446	0.889351	0.423037	0.789892	0.639136	0.675444
LRRC40	0.51835	0.415842	0.264079	0.455105	0.641063	0.634664	0.696882	0.813754	0.279199	0.869566
ISOC1	0.590356	0.614102	0.647299	0.380311	0.698572	0.830901	0.19563	0.450553	0.174643	0.75342
EML1	0.807507	0.548406	0.653262	0.902191	0.643053	0.715907	0.896687	-0.0602312	0.865693	0.745831
TRMT11	0.54098	0.522252	0.467538	0.435602	0.646979	0.696959	0.439111	0.615041	0.392922	0.726759
THUMPD1	0.553829	0.563821	0.491673	0.649034	0.599922	0.742389	0.667656	0.844216	0.235462	0.620096
KIF26A	0.664951	0.542241	0.634939	0.171411	0.370346	0.685564	0.104887	0.18398	0.635472	0.77236
ATG2B	0.500902	0.421762	0.370532	0.598448	0.5859	0.597679	0.233476	0.570171	0.320027	0.702241
ARFGEF1	0.673644	0.602357	0.643474	0.501274	0.432806	0.794195	0.764807	0.760172	0.426414	0.519316
ZFAT	0.308583	0.481068	0.368499	0.308104	0.189406	0.290155	0.660531	0.80081	-0.0222684	0.111389
MTFR1	0.708295	0.79502	0.582713	0.522522	0.744993	0.811482	0.766884	0.87843	0.400471	0.856204
STAG3	0.449289	0.476958	0.488909	0.166466	0.7814	0.38973	0.509726	0.471109	0.353271	0.153355
FECH	0.728519	0.560666	0.703542	0.605127	0.682208	0.63104	0.723236	0.696825	0.680125	0.529711
MYO9A	0.578229	0.520842	0.496563	0.44255	0.621545	0.824036	0.554734	0.287584	0.205814	0.679077
DDX3Y	0.797151	0.318722	0.793786	0.807435	0.93087	0.170205	0.556349	0.896329	0.65667	0.867907
PFKP	0.770657	0.896075	0.621928	0.68498	0.874056	0.544661	0.244571	0.936658	0.48692	0.822739
IDI1	0.632937	0.760832	0.482113	0.563307	0.387565	0.796676	0.511528	0.879144	0.661227	0.498764
SP100	0.680372	0.506529	0.631568	0.572122	0.72958	0.788278	0.569921	0.542719	0.529732	0.677113
KLF6	0.741071	0.775764	0.717113	0.499816	0.524541	0.731957	0.588558	0.87663	0.713815	0.570209
PPAP2A	0.620179	0.601379	0.762985	0.53173	0.399079	0.407612	0.864139	0.680978	0.445157	0.822083
NEO1	0.713837	0.775076	0.759272	0.655886	0.556688	0.562658	0.608658	0.754855	0.657562	0.861813
TRAM1	0.593313	0.313807	0.753763	0.251307	0.183208	0.65994	0.747503	0.838985	0.329919	0.662569
PHKA1	0.607386	0.537016	0.762233	0.499617	0.427628	0.775216	0.558703	0.466902	0.473943	0.79261
TNFRSF1A	0.82145	0.737324	0.83262	0.693595	0.533965	0.886584	0.720027	0.612115	0.623725	0.77434
CACNB1	0.181315	0.145001	0.0341969	0.177486	0.149327	0.422711	0.192528	0.231793	0.095322	0.376095
EVI5	0.534628	0.41923	0.294059	0.549124	0.794106	0.585705	0.73893	0.711685	0.245164	0.781581
STOML1	0.428269	0.275656	0.403129	0.389691	0.366239	0.415249	0.310358	0.684012	0.208772	0.577696
PKM	0.537748	0.611946	0.3537	0.460754	0.60914	0.346538	0.714305	0.938249	0.329321	0.770106
DHX29	0.593855	0.555925	0.632972	0.689094	0.726832	0.912257	0.489199	0.889427	0.32748	0.613039
DNTTIP2	0.606072	0.536367	0.60773	0.525507	0.731062	0.689163	0.869079	0.81425	0.400971	0.802894
METTL22	0.518704	0.513812	0.525215	0.485909	0.520557	0.673143	0.594852	0.437207	0.285037	0.541298
TP53BP1	0.458897	0.322537	0.55742	0.286756	0.352146	0.432482	0.438009	0.590834	0.232379	0.596851
TRO	0.8207	0.672108	0.678	0.148217	0.752273	0.92211	0.709623	0.842584	0.193133	0.857516
RRP15	0.336459	0.304654	0.177545	0.435478	0.684525	0.618705	0.83225	0.536654	0.0650102	0.657262
RHOA	0.402722	0.422697	0.304939	0.416955	0.457716	0.328635	0.648573	0.303021	0.267376	0.462201
DHX8	0.490443	0.381399	0.520639	0.453673	0.29664	0.577378	0.426219	0.862325	0.429606	0.5962
PMS2P4	0.162456	0.174074	0.0233429	0.328981	0.126028	0.219667	0.184265	0.224525	0.0617809	0.22948
PRKCZ	0.7309	0.566991	0.522914	0.393961	0.596133	0.236844	0.651005	0.0910616	0.3268	0.674747
ZFY	0.711767	0.565372	0.837277	0.707391	0.928366	-0.046741	0.275342	0.966959	0.752858	0.626802
IARS2	0.747057	0.484854	0.761002	0.627008	0.884939	0.776721	0.844763	0.738863	0.27347	0.685923
SYT1	0.756177	0.74864	0.733894	0.940784	0.923746	0.671436	0.645675	0.715981	0.700115	0.396591
NAV3	0.677152	0.461496	0.573494	0.735075	0.511862	0.209705	0.769219	0.897525	0.366388	0.490245
IDH3G	0.528735	0.620873	0.36667	0.286048	0.830577	0.668786	0.686118	0.88628	0.289808	0.537916
ROGDI	0.612572	0.525121	0.548131	0.538512	0.459922	0.454585	0.744692	0.517071	0.494041	0.548581
PDZD4	0.17491	0.240925	0.115206	0.0394608	0.17288	0.538581	0.201126	-0.0311607	0.0404237	0.218263
ATP2B3	0.212872	0.236212	0.031661	0.142477	0.114172	0.210057	0.202865	0.128632	0.133567	0.537194
ROCK1	0.249558	0.19592	0.241046	0.300573	0.155364	0.51854	0.399943	0.123046	0.217524	0.157652
CBFB	0.541019	0.412738	0.625484	0.335438	0.813729	0.540333	0.581441	0.592692	0.246559	0.690121
PDK3	0.699297	0.680179	0.581126	0.439988	0.705655	0.694818	0.569824	0.712493	0.617767	0.681243
HYAL2	0.50509	0.385258	0.47312	0.530287	0.556147	0.46278	0.474755	0.401427	0.422174	0.551518
HDAC4	0.548785	0.427812	0.776982	0.498772	0.567946	0.578931	0.497883	0.468159	0.106139	0.556077
RASSF1	0.625131	0.560785	0.561589	0.622769	0.717489	0.366064	0.56644	0.253248	0.565629	0.655861
FGFR3	0.657475	0.350672	0.653094	0.398559	0.558958	0.562496	0.710926	0.523777	0.63331	0.740051
IFI35	0.562354	0.338991	0.548903	0.404782	0.546785	0.828618	0.737252	0.73086	0.346543	0.745298
HEATR6	0.599141	0.604657	0.53027	0.477684	0.68414	0.812383	0.403153	0.940676	0.332951	0.651654
COASY	0.653074	0.462704	0.490672	0.401007	0.557345	0.720269	0.8045	0.809942	0.336847	0.699499
PLEKHH3	0.285243	0.455329	0.337355	0.0982628	-0.0346856	0.14181	0.385425	0.0696634	0.11143	0.64857
MEF2A	0.610503	0.708334	0.567813	0.573653	0.666283	0.616204	0.56087	0.614561	0.236876	0.7436
OTUD5	0.440895	0.439433	0.24499	0.438805	0.751862	0.801849	0.446525	0.375758	0.248667	0.552988
TFE3	0.590597	0.58087	0.460827	0.562876	0.639249	0.660686	0.439961	0.453983	0.49248	0.492237
TBC1D25	0.352733	0.40252	0.248999	0.242858	0.542385	0.371563	0.29816	0.650092	0.225584	0.54993
INPP5A	0.54783	0.546117	0.552818	0.289586	0.591441	0.71765	0.608243	0.715748	0.372471	0.775433
GPKOW	0.520677	0.524484	0.425395	0.514614	0.551571	0.633244	0.604938	0.770324	0.372334	0.504165
GRIPAP1	0.43176	0.421094	0.377235	0.340249	0.556971	0.580203	0.143983	0.436105	0.265342	0.459716
FTSJ1	0.637898	0.680038	0.421779	0.490404	0.682333	0.664084	0.816914	0.829199	0.552035	0.499481
REEP1	0.647401	0.594171	0.759731	0.476507	0.243262	0.407974	0.0852646	0.0234616	0.725041	0.889398
ATP11A	0.687371	0.632679	0.743255	0.358186	0.670777	0.764678	0.864144	0.650844	0.612955	0.626526
POLR1A	0.354526	0.227991	0.386397	0.152827	0.189304	0.548085	0.471334	0.281995	0.316549	0.430022
LAPTM4A	0.819815	0.750859	0.65793	0.670754	0.588927	0.824423	0.968214	-0.0305985	0.626886	0.677003
TTC7A	0.547556	0.529463	0.556149	0.515434	0.355476	0.523849	0.450871	0.455083	0.110538	0.426735
IP6K2	0.579065	0.477053	0.354201	0.679931	0.48526	0.469519	0.675827	0.115808	0.364646	0.719677
SRBD1	0.361931	0.515891	0.24072	0.281771	0.550295	0.697179	0.430918	0.603023	0.173429	0.69126
KIF2A	0.517242	0.44599	0.522783	0.337984	0.546495	0.751619	0.637325	0.818249	0.427825	0.557096
RASGRP2	0.549712	0.430638	0.361822	0.205085	0.218634	0.232095	0.221791	0.0606669	0.266342	0.692937
PSME4	0.548581	0.632247	0.529447	0.432313	0.545848	0.505114	0.4697	0.465588	0.298606	0.347738
SIRT2	0.43894	0.511535	0.370561	0.359172	0.645473	0.31127	0.728672	0.594607	0.140503	0.835141
ERLEC1	0.643446	0.453432	0.715261	0.64812	0.825525	0.484318	0.533713	0.579774	0.501999	0.603962
PPP2R5B	0.470526	0.42615	0.404612	0.277143	0.656377	0.409583	0.393989	0.746485	0.429261	0.646964
PYGM	0.0680804	0.0700482	0.0368932	0.0268992	-0.022352	0.139209	0.0559231	0.104915	0.0716238	0.242798
PAGE1	0.529905	0.710821	0.525421	0.522894	0.261222	0.902514	-0.0152902	0.460845	0.213319	0.871501
PITX1	0.691803	0.583518	0.759186	0.428506	0.0485696	0.41237	0.494354	0.742565	0.349131	0.723172
TRPC7	0.0629025	0.0632589	0.0506028	0.0806024	0.00364653	0.070871	-0.0155292	-0.0606652	0.163349	0.0669949
MAST4	0.698414	0.712634	0.71391	0.536765	0.412224	0.663595	0.850086	0.87188	0.605416	0.697042
GPR116	0.653505	0.733425	0.8371	0.58037	0.800454	0.881647	0.459348	0.831035	0.0132548	0.789969
SDK2	0.479374	0.437112	0.484839	0.311072	0.629989	0.639965	0.196615	0.423324	0.215467	0.385804
ADAM7	0.185075	0.177813	-0.0392528	-0.00653922	0.0383866	-0.0209261	0.577112	0.0946443	0.0241126	0.230484
NUP133	0.549487	0.547845	0.423042	0.555546	0.425298	0.63845	0.652414	0.483348	0.342657	0.603772
NUCKS1	0.434558	0.450982	0.298258	0.228396	0.692309	0.648878	0.621457	0.951219	0.291039	0.238419
VPS35	0.72899	0.616934	0.686381	0.576727	0.859814	0.609925	0.883973	0.502093	0.623065	0.704975
DNAJA2	0.498836	0.451553	0.42707	0.343672	0.703067	0.570372	0.611258	0.80926	0.244792	0.699545
BCL3	0.507195	0.335407	0.526226	0.230318	0.345566	0.532768	0.226289	0.477239	0.242386	0.523398
KCNAB2	0.503248	0.301818	0.296365	0.36333	0.856117	0.229985	0.589779	0.213914	0.263253	0.625484
ABCC9	0.560048	0.0662012	0.731434	0.117505	0.21957	0.690026	0.899046	-0.0511638	0.160853	0.517678
GAL	0.713791	0.744902	0.652076	0.633361	0.679183	0.671514	0.221837	0.922582	0.716157	0.642669
CLEC2D	0.592481	0.533522	0.463881	0.663499	0.195897	0.175641	0.776074	0.151589	0.656631	0.382693
FUNDC1	0.706	0.549915	0.410543	0.550804	0.970927	0.861333	0.652416	0.977422	0.510708	0.6852
MAOB	0.737525	0.599581	0.732063	0.737004	0.558466	0.702133	0.77185	0.94417	0.634121	0.620501
RORA	0.696901	0.55305	0.803945	0.581915	0.489364	0.623651	0.611963	0.672026	0.490803	0.794913
DRD4	0.154763	0.00458991	0.241292	0.0785191	0.0192843	0.0976927	0.232307	0.076736	0.08353	0.452724
TGFBR3	0.719681	0.782013	0.79629	0.730462	0.493115	0.439813	0.75205	0.662832	0.445001	0.72483
KIAA1107	0.346435	0.38246	0.0848289	0.333845	0.386806	0.521765	0.738352	0.300998	0.203954	0.408494
PLA2G10	0.800598	0.575233	0.61897	0.501779	0.220737	0.547145	0.395494	0.94989	0.576901	0.201361
HES2	0.588997	0.340282	0.629343	0.643895	0.593289	0.47474	0.213766	0.150881	0.432833	0.613911
ATP1B3	0.410211	0.190359	0.35515	0.470834	0.204422	0.443019	0.185312	0.345294	0.287473	0.437306
NEDD4	0.68316	0.790735	0.677366	0.457659	0.461633	0.480118	0.789082	0.956317	0.714293	0.751454
PIGB	0.618638	0.665127	0.480138	0.500023	0.600201	0.8651	0.493162	0.498338	0.370729	0.778934
MAPK6	0.302941	0.188926	0.344385	0.293732	0.460514	0.308094	0.281766	0.108439	0.230401	0.245826
GNB5	0.724277	0.605952	0.473198	0.576937	0.737844	0.846329	0.582596	0.0688795	0.633311	0.704564
RAB27A	0.794236	0.756844	0.745005	0.712591	0.862924	0.703331	0.863823	0.775706	0.612732	0.882192
CECR5	0.769729	0.686965	0.487262	0.715692	0.569007	0.392379	0.355315	0.823984	0.453303	0.869021
UFD1L	0.552679	0.461405	0.439678	0.613486	0.732938	0.606646	0.672059	0.643115	0.323167	0.772978
LRP6	0.621699	0.634179	0.612824	0.631477	0.38918	0.539281	0.640618	0.754689	0.498621	0.776935
GUCY2C	0.821064	0.315649	0.389544	0.623358	0.372583	0.556103	0.160787	0.962215	0.843623	0.660872
SCT	0.160426	0.0483816	0.020689	0.151461	0.106262	0.0350317	0.100491	-0.0310247	0.365496	0.361198
PHRF1	0.326646	0.479802	0.308233	0.179969	0.176585	0.290067	0.190544	0.55632	0.27387	0.0762448
IKBKAP	0.593333	0.4465	0.745149	0.404701	0.658039	0.583383	0.458283	0.599513	0.400093	0.75042
NUCB2	0.701169	0.725217	0.609088	0.456622	0.830882	0.561839	0.847337	0.579174	0.595798	0.840642
PTPN3	0.810813	0.749842	0.811581	0.482714	0.737209	0.56553	0.779832	0.325635	0.630273	0.697168
SPTB	0.1596	-0.0166734	0.180947	0.0706474	0.229645	0.337692	0.0765558	0.259433	0.09993	0.0882004
DAPP1	0.796133	0.811192	0.656032	0.752042	-0.00361759	0.560236	0.939699	0.32194	0.66035	0.256822
FGF10	0.376888	0.115312	0.102724	0.00922848	0.424469	0.557942	0.18518	0.515596	0.0264023	0.596631
SLC44A1	0.616096	0.709599	0.691535	0.615789	0.656563	0.763648	0.329181	0.754323	0.68489	0.396617
TMEM260	0.528646	0.389216	0.518724	0.467599	0.315216	0.383511	0.642049	0.780284	0.535989	0.755313
SMG6	0.296503	0.325118	0.219611	0.199773	0.271299	0.231521	0.269455	0.0892892	0.0976308	0.355363
EXOC5	0.526485	0.463714	0.600436	0.543255	0.794441	0.475244	0.383236	0.695242	0.274004	0.753276
CLTCL1	0.382274	0.228064	0.366232	0.409865	0.692684	0.35408	0.48884	0.507411	0.226019	0.170928
FGF22	0.120317	0.137286	0.0813013	0.130543	0.354324	0.130058	0.176674	0.00824278	0.011739	0.105855
FSTL3	0.534227	0.521992	0.515366	0.49775	0.46884	0.333927	0.535956	0.487987	0.471908	0.596605
DGCR2	0.258109	0.129738	0.181316	0.228636	0.280668	0.453579	0.139992	0.0475348	0.050102	0.366473
RNF126	0.673922	0.610296	0.463566	0.518799	0.696872	0.633912	0.359838	0.66654	0.443472	0.806541
MNT	0.317026	0.316127	0.334908	0.145832	0.0975195	0.5081	0.381994	0.0721916	0.1999	0.396432
ZXDC	0.388251	0.383547	0.450425	0.209229	0.325911	0.425017	0.601727	0.0659319	0.243476	0.637832
JMJD6	0.474871	0.455651	0.436897	0.420437	0.630842	0.300916	0.359495	0.494009	0.33505	0.62498
POLB	0.577848	0.678869	0.683471	0.317515	0.736689	0.605114	0.91319	0.289747	0.113432	0.717044
ST6GALNAC1	0.8415	0.519756	0.646076	0.403986	0.719039	0.688016	0.623196	0.944685	0.661358	0.312154
WIPI1	0.733552	0.690488	0.752402	0.549921	0.886781	0.772048	0.545071	0.583084	0.618194	0.683588
FRMPD1	0.151035	0.298202	-0.0310027	0.427415	-0.0717961	0.165789	0.313228	0.1582	0.224771	0.339133
GBA2	0.521946	0.469785	0.477722	0.551736	0.710448	0.617791	0.521874	0.0570635	0.21056	0.401426
NDST1	0.393288	0.289451	0.252482	0.514703	0.396582	0.41355	0.342544	0.413133	0.166055	0.617034
ASNS	0.66099	0.519225	0.311741	0.544491	0.642085	0.73791	0.738608	0.303397	0.338305	0.911261
AP3M2	0.709779	0.727632	0.728797	0.649453	0.691886	0.899751	0.506939	0.735242	0.304675	0.849619
CNGB1	0.119473	0.0422648	0.0912876	-0.0208256	0.101111	0.0451717	-0.0054001	-0.00384539	-0.0403277	0.26899
ST6GALNAC2	0.781368	0.583527	0.912461	0.781849	0.832551	0.494594	0.570649	0.861904	0.575959	0.6618
CHAT	0.120895	0.175277	0.0803402	0.116018	0.0530168	0.125031	0.192173	0.147802	0.0912846	0.0137059
TESK2	0.613199	0.853039	0.661174	0.22819	0.710359	0.587091	0.362331	0.80081	0.386971	0.588393
C16orf80	0.628275	0.64258	0.56766	0.607603	0.879744	0.72915	0.417641	0.212077	0.512911	0.70297
CSNK2A2	0.615131	0.432098	0.637143	0.464411	0.768593	0.768662	0.772381	0.888503	0.622035	0.772868
PTPN21	0.625897	0.7447	0.650137	0.359756	0.738187	0.625215	0.658996	0.575769	0.585551	0.665986
EIF2B3	0.601515	0.529726	0.578059	0.602564	0.754208	0.443496	0.672238	0.72752	0.351905	0.746948
CAMK2A	0.0667149	-0.0174978	0.00461169	0.0991466	0.104796	0.294074	0.238579	0.342519	-0.00414886	0.0869314
TCOF1	0.420523	0.388814	0.397483	0.321888	0.635705	0.377304	0.261686	0.2061	0.416398	0.389075
CDC42	0.534475	0.083626	0.275732	0.718597	0.717192	0.760114	0.779071	0.726469	0.465516	0.625753
OSBPL3	0.779039	0.737972	0.719723	0.454808	0.815268	0.811719	0.795166	0.599957	0.306335	0.69999
EPHA8	0.0863319	0.0142445	0.188563	0.0639834	-0.0446426	0.460878	0.103209	0.0257742	-0.0679697	0.350515
SLC12A3	0.267835	0.0964279	0.399416	0.0755042	0.277389	0.224431	0.00142408	0.187455	0.05828	0.14119
RAD18	0.525591	0.631776	0.335329	0.312484	0.671255	0.526463	0.471973	0.37088	0.287728	0.5316
ATP2B1	0.685563	0.749858	0.681387	0.612485	0.768642	0.438642	0.777796	0.450269	0.362666	0.510274
TRPM5	0.115671	0.0312806	0.192782	0.102142	0.257143	0.081413	-0.0894346	0.202048	0.134928	-0.10284
NCK2	0.641349	0.649605	0.56662	0.693722	0.514098	0.351645	0.725411	0.632629	0.501166	0.543064
MAP4K4	0.694576	0.792295	0.690373	0.47435	0.600018	0.462463	0.672974	0.835449	0.397911	0.663982
MGAT4A	0.669618	0.707552	0.474047	0.668356	0.636908	0.16921	0.623993	0.828004	0.562849	0.676393
RPL31	0.558309	0.424914	0.516191	0.293697	0.468665	0.806481	0.677219	0.664866	0.530822	0.801673
WDR1	0.620278	0.449277	0.399399	0.484807	0.706825	0.735468	0.744068	0.641985	0.50196	0.816874
SNX13	0.436267	0.594604	0.401073	0.241836	0.665377	0.404626	0.271937	0.734086	0.275737	0.621713
MS4A12	0.474439	0.128981	0.0253711	0.16355	0.0860994	0.040958	0.27467	0.282888	0.514599	0.261251
ARHGAP10	0.3798	0.0998178	0.324425	0.195632	0.286604	0.459914	0.56564	0.364139	0.291453	0.641681
RPS6KA2	0.735166	0.683466	0.717438	0.615233	0.677041	0.763788	0.557222	0.362845	0.699133	0.900456
ING3	0.551884	0.560386	0.481679	0.39101	0.381171	0.718683	0.628797	0.55636	0.289461	0.656935
VASH1	0.471962	0.404633	0.12128	0.182587	0.354214	0.607678	0.636378	0.322177	0.183215	0.598977
LMCD1	0.599851	0.331379	0.423295	0.430927	0.440671	0.59401	0.875949	0.634424	0.276104	0.664559
WBSCR22	0.382539	0.289573	0.447332	0.495606	0.248481	0.477757	0.50889	0.329458	0.149027	0.330817
SEL1L	0.56291	0.542202	0.607188	0.558412	0.528121	0.558171	0.576979	0.590806	0.481108	0.50408
TRIP13	0.609645	0.671894	0.722712	0.552633	0.62955	0.352259	0.317259	0.601435	0.480842	0.518576
ATP6AP1	0.493068	0.37903	0.460852	0.388286	0.655888	0.601559	0.836363	0.512926	0.275136	0.549098
TCF3	0.60513	0.573554	0.672895	0.53486	0.769255	0.604305	0.574725	0.373755	0.355422	0.723754
TRIB2	0.767979	0.566466	0.879447	0.671027	0.889354	0.721076	0.502736	0.861774	0.58688	0.811837
DAZAP1	0.547016	0.394016	0.517593	0.449596	0.426456	0.461888	0.403518	0.315143	0.338839	0.366164
MBD3	0.459962	0.376719	0.361127	0.37038	0.417141	0.46156	0.318237	0.762898	0.331177	0.592338
PRLH	0.0409286	0.255171	0.0476837	-0.0435289	0.148579	0.180402	-0.0420739	-0.000565019	-0.0178557	0.0630043
HLTF	0.834651	0.837801	0.8245	0.802589	0.707208	0.779809	0.828708	0.264156	0.765988	0.796211
FAM50A	0.61622	0.547751	0.6181	0.655307	0.685798	0.594181	0.597237	0.89994	0.447426	0.864831
FAM3A	0.495762	0.516719	0.385731	0.262959	0.868746	0.600849	0.640443	0.918868	0.249013	0.580837
CPSF1	0.488833	0.525275	0.574055	0.494857	0.492724	0.466235	0.274302	0.118247	0.266606	0.506224
MYO3B	0.424053	0.419411	0.578954	0.20731	-0.0240952	0.394999	0.585248	-0.0829325	0.405299	0.205581
CYBRD1	0.726451	0.519289	0.735418	0.884459	0.601577	0.365885	0.565602	0.842541	0.705461	0.722542
CDH19	0.827301	0.658218	0.692071	0.900652	0.93804	0.834657	0.165133	0.573347	0.201545	0.88428
PDCD2	0.532019	0.58192	0.372351	0.528909	0.490831	0.474858	0.378621	0.772648	0.357757	0.725022
SLC6A15	0.7019	0.636917	0.664502	0.195834	0.696108	0.510946	0.0403339	0.102211	0.0494782	0.475791
PRKACA	0.439757	0.567019	0.19937	0.585524	0.322344	0.364549	0.118896	0.284273	0.228288	0.133543
LPHN1	0.553806	0.325795	0.530582	0.431844	0.457193	0.623769	0.621059	0.501998	0.508116	0.85714
SPP2	0.128185	0.136324	0.102359	0.0522812	-0.0710131	0.209386	0.129195	0.227763	0.136287	0.0163512
ACTN1	0.778994	0.65077	0.845655	0.507294	0.665617	0.573219	0.81099	0.751518	0.52557	0.89074
ZFYVE26	0.603378	0.396802	0.500631	0.673155	0.442071	0.868113	0.492892	0.678427	0.461693	0.684791
RPS6KA6	0.652008	0.476009	0.658165	0.568032	0.802004	0.87023	0.320532	0.729303	0.585477	0.693074
EPN2	0.543307	0.518534	0.429302	0.342434	0.419768	0.559518	0.0754464	0.200039	0.328732	0.707471
PTPN18	0.561472	0.526232	0.38533	0.416298	0.694181	0.361116	0.327495	0.334355	0.320294	0.482875
LIMS2	0.411994	0.549001	0.370144	0.158788	0.612121	0.26511	0.269042	-0.129198	0.0455381	0.526316
ASIC4	0.102954	0.0713439	-0.0559332	0.0905786	0.293339	0.0384541	0.148604	0.227585	0.00687803	0.0973536
SPEG	0.366149	0.5637	0.473556	0.294498	-0.0129593	0.587616	0.142965	0.470022	0.0956659	0.294151
LNX1	0.616911	0.779143	0.46384	0.674346	0.553438	0.567799	0.551672	0.428488	0.633644	0.563663
ALDH3A2	0.720757	0.85652	0.77313	0.416652	0.513392	0.470404	0.591975	0.892334	0.733341	0.686361
TFRC	0.654613	0.66043	0.715445	0.473858	0.507756	0.701521	0.440386	0.152707	0.387887	0.359412
SREBF1	0.541329	0.555524	0.556132	0.543244	0.344562	0.462788	0.512147	0.479747	0.540563	0.271962
TRPC5	0.0619731	-0.034438	0.0310067	0.0171086	0.0286652	0.0111993	0.053703	-0.0572307	0.0349164	0.173574
AFF4	0.336271	0.422708	0.368346	0.270468	0.238031	0.362599	0.407731	0.371251	0.0974524	0.524552
UBE2D1	0.419067	0.439359	0.484016	0.337959	0.505199	0.511033	0.454551	0.688756	0.169923	0.657782
MPP5	0.63585	0.561769	0.565304	0.726371	0.800111	0.70023	0.450361	0.460245	0.508823	0.563509
RHOBTB1	0.698517	0.540788	0.575304	0.698498	0.726659	0.39894	0.81073	0.864896	0.695228	0.617695
SMC1A	0.435331	0.317891	0.207725	0.310927	0.725638	0.471884	0.365946	0.46416	0.30626	0.504704
HSD17B10	0.61365	0.716785	0.370519	0.570848	0.602572	0.465824	0.790343	0.736363	0.59528	0.70687
MARK2	0.550331	0.556962	0.375751	0.273231	0.316513	0.248073	0.558233	0.881137	0.240529	0.0660215
HMMR	0.407633	0.489061	0.347851	0.194934	0.681511	0.443601	0.220208	0.614208	0.442075	0.528128
CHFR	0.666814	0.684118	0.673834	0.613865	0.726654	0.521494	0.619015	0.852509	0.583037	0.75493
TRHDE	0.709411	0.370579	0.74773	0.790501	0.271921	0.554318	0.777203	0.847289	0.518591	0.755104
P4HA2	0.48478	0.551168	0.446464	0.541999	0.450511	0.272241	0.550542	0.165849	0.330398	0.427991
FCGR2B	0.711229	0.250422	0.632187	-0.0387766	0.810421	0.592648	0.780801	-0.016364	0.582397	0.583431
NFATC3	0.607737	0.478831	0.661067	0.577177	0.754913	0.796268	0.600435	0.350965	0.373182	0.682354
TRNT1	0.607928	0.599158	0.626012	0.620896	0.698178	0.432627	0.564873	0.332451	0.349814	0.760279
ACADVL	0.602823	0.5718	0.394994	0.535387	0.454613	0.641298	0.615184	0.652653	0.392833	0.666538
STK10	0.680592	0.545	0.730898	0.479163	0.637451	0.669325	0.557399	0.183305	0.530879	0.74104
FBXW11	0.496304	0.586291	0.47251	0.341429	0.661256	0.446048	0.493862	0.597694	0.3166	0.521347
ACAP1	0.339714	0.0363724	0.60499	0.138949	0.102057	0.103506	0.452335	0.0954162	0.283841	0.0689176
CRMP1	0.568534	0.631214	0.564711	0.244853	0.351901	0.696161	0.393116	0.738649	0.0552202	0.785768
EVC	0.167464	0.255133	0.120502	0.0907521	0.267933	0.227119	0.157691	0.0605256	0.0127669	0.191691
DERL2	0.625852	0.600141	0.498988	0.539203	0.618825	0.828453	0.851004	0.663467	0.57582	0.456053
SIDT1	0.716606	0.834624	0.634916	0.758583	0.479674	0.643218	0.853621	0.64785	0.482749	0.5176
NDE1	0.608373	0.359667	0.607356	0.588537	0.71879	0.713752	0.510457	0.396404	0.388907	0.666494
TMEM38A	0.674032	0.586114	0.592682	0.638799	0.584599	0.571553	0.323001	0.523475	0.562149	0.721398
AP1M1	0.630275	0.544295	0.511582	0.487773	0.657758	0.679978	0.528887	0.893932	0.467908	0.433673
PVR	0.548684	0.382102	0.632086	0.360385	0.352464	0.839701	0.530632	0.329463	0.374657	0.599245
XRCC1	0.387177	0.311621	0.508249	0.367834	0.51668	0.475105	0.20572	0.363304	0.272418	0.674385
SCARB1	0.735266	0.705627	0.722089	0.483802	0.82524	0.703476	0.650337	0.548412	0.372968	0.652775
CYP2W1	0.298474	0.0833647	0.153225	0.234288	-0.0498882	0.158765	0.162658	0.2296	0.410736	0.0871158
MCM2	0.526575	0.432288	0.463697	0.361763	0.794472	0.444781	0.483963	0.648287	0.385684	0.628985
MOV10L1	0.111487	0.246176	0.110645	0.119933	-0.0188068	0.241194	0.0485712	-0.0931058	0.0511387	0.253858
PANX2	0.483699	0.368839	0.582352	0.373045	0.133167	0.424688	0.597222	0.541966	0.0715765	0.251171
TP63	0.835895	0.484829	0.854291	0.678039	0.0818577	0.151707	0.837939	0.942084	0.541249	0.263793
ALPK1	0.558156	0.564467	0.414795	0.643709	0.283937	0.686103	0.517031	0.226977	0.358271	0.564194
LLGL2	0.825237	0.565919	0.725508	0.657304	0.196635	0.489395	0.413813	0.900879	0.727918	0.390931
PDE8A	0.626974	0.549448	0.570721	0.604674	0.642858	0.85697	0.516571	0.812304	0.291428	0.717359
CLCN4	0.600259	0.610297	0.534431	0.284072	0.811492	0.583092	0.546725	0.670867	0.50114	0.569469
NLE1	0.535293	0.438028	0.625898	0.351785	0.4605	0.618036	0.56599	0.592684	0.472152	0.420741
SMARCE1	0.692458	0.678414	0.731349	0.551439	0.634203	0.656453	0.596977	0.845304	0.347406	0.916481
FNDC8	0.0712214	0.0814374	-0.00581148	0.0703095	0.0387439	0.0314333	0.0168057	-0.0228996	0.0666674	-0.0053712
GSDMB	0.757132	0.28754	0.342639	0.738888	0.460647	0.657062	0.462871	0.631879	0.444312	0.423303
KDM5A	0.532245	0.707147	0.431248	0.630898	0.400258	0.715859	0.531284	0.67541	0.307404	0.686896
ADAM11	0.138954	0.109434	0.0171988	-0.00849766	0.268257	0.031691	0.100446	0.194298	0.128322	0.16735
PPP2R3A	0.749789	0.519723	0.697369	0.566145	0.37204	0.448619	0.872554	0.596584	0.685296	0.797362
FERMT2	0.836303	0.793617	0.756612	0.337931	0.68261	0.77412	0.846539	0.947553	0.421807	0.757791
ABCB11	0.143112	0.118863	0.163311	0.0429602	0.103962	0.0664436	-0.0136335	0.0225475	0.0831344	0.135557
DHRS9	0.736089	0.60861	0.476072	0.680687	0.141102	0.709929	0.86397	0.570224	0.713379	0.684767
CD5L	0.128039	-0.0140972	0.201632	0.0618972	0.345903	0.0543831	0.262132	-0.131722	0.0549224	0.015702
PTGS2	0.685736	0.710868	0.742747	0.622262	0.503239	0.643026	0.596136	0.299477	0.867192	0.739529
IGF2BP2	0.421592	0.193189	0.348846	0.156846	0.309875	0.453273	0.252339	0.18562	0.284892	0.674952
MAP3K13	0.616261	0.58621	0.654521	0.643734	0.457599	0.218238	0.652664	0.446587	0.417297	0.56765
ST6GAL1	0.710552	0.644208	0.776638	0.591485	0.6285	0.421749	0.740487	0.661766	0.636682	0.57018
TBX21	0.290968	0.0731781	0.569121	-0.0237527	-0.0400617	0.284881	0.66281	-0.135536	0.341402	0.0920448
FRY	0.617465	0.518973	0.730543	0.535439	0.328543	0.855035	0.758847	0.57762	0.439748	0.475728
PICALM	0.509547	0.636572	0.211759	0.284254	0.59851	0.771767	0.32465	0.331113	0.189524	0.41788
NSF	0.612811	0.654464	0.716917	0.345311	0.466694	0.51926	0.660812	0.601152	0.628915	0.566883
GLI2	0.762759	0.709955	0.854667	0.449766	0.72069	0.79441	0.796952	0.63957	0.302563	0.836167
CLASP1	0.446111	0.413117	0.61487	0.460063	0.273939	0.424989	0.451123	0.338475	0.115658	0.704389
MRPS34	0.615695	0.66076	0.58602	0.345696	0.590944	0.626822	0.436921	0.297872	0.442959	0.702399
NOTCH3	0.552765	0.427126	0.60292	0.418592	0.00879007	0.322268	0.553883	0.744353	0.229806	0.692335
CLNS1A	0.494687	0.439293	0.435048	0.372821	0.51524	0.964708	0.605307	0.113363	0.326186	0.418377
PPP2R2C	0.709819	0.499321	0.742739	0.685059	0.575627	0.474663	0.888051	0.706455	0.458906	0.617153
TEAD2	0.606868	0.707676	0.418545	0.489151	0.473223	0.581587	0.592244	0.691531	0.367859	0.711364
EED	0.61406	0.533891	0.555285	0.291789	0.728545	0.715598	0.668143	0.629466	0.319577	0.7376
CDHR2	0.534824	0.052641	0.0998116	0.431587	-0.00133312	0.0968503	0.530572	0.651569	0.301161	0.123862
SNCB	0.0916901	0.0829942	0.0127909	0.140214	0.0686705	0.105344	0.340473	-0.0645461	0.0391437	0.000238311
TSG101	0.750587	0.709474	0.59549	0.789512	0.470643	0.789518	0.68491	0.343022	0.779962	0.781162
C17orf85	0.506114	0.421488	0.287081	0.557351	0.339115	0.66966	0.85274	0.106293	0.194011	0.688479
ATP2A3	0.615346	0.480835	0.672463	0.487535	0.174195	0.519769	0.725395	0.49873	0.473465	0.698049
CA12	0.734668	0.772682	0.853685	0.707589	0.3398	0.147522	0.818815	0.740157	0.662996	0.808643
MGLL	0.733709	0.568553	0.703059	0.737827	0.840024	0.381475	0.902191	0.169852	0.546851	0.73644
NTN4	0.707658	0.539149	0.66384	0.694205	0.895994	0.899037	0.850198	0.78083	0.468005	0.718529
BCS1L	0.553421	0.414481	0.594343	0.470966	0.601235	0.352978	0.650864	0.593115	0.445858	0.742652
NUAK1	0.715549	0.667496	0.737824	0.660341	0.616199	0.392216	0.699545	0.438705	0.481811	0.624029
DPP8	0.644374	0.696194	0.474983	0.60626	0.609107	0.840444	0.687296	0.851411	0.521862	0.757616
SLC24A1	0.432613	0.619659	0.37607	0.395841	0.339727	0.359971	0.277332	0.383191	0.266004	0.497094
SCARF1	0.349472	0.30072	0.0760969	0.31078	0.404054	0.522596	0.306441	0.864164	0.147155	0.436209
LMAN1	0.493971	0.531251	0.407254	0.470897	0.547264	0.500358	0.471999	0.761607	0.235319	0.396459
PTPLAD1	0.544214	0.725561	0.752195	0.433178	0.848865	0.612929	0.645144	0.338084	0.375571	0.763154
IPCEF1	0.547867	0.453995	0.552288	0.538403	0.0914074	0.390517	0.717663	0.161584	0.592808	0.62692
ZZEF1	0.317705	0.319368	0.256629	0.296669	0.111403	0.203056	0.287662	0.327953	0.311333	0.308136
NOX3	0.0462387	0.0375905	-0.0254121	0.024299	0.251008	-0.0200567	0.296108	-0.101845	0.0401173	-0.00254
ENO1	0.572612	0.729308	0.456708	0.632147	0.715745	0.505529	0.514888	0.486262	0.217193	0.700969
SLC12A1	0.395783	0.589812	0.227907	-0.00687758	0.152318	0.714377	-0.0592066	-0.111138	0.106217	0.215527
C19orf10	0.585439	0.634218	0.46634	0.505893	0.496018	0.459399	0.310911	0.623225	0.433408	0.542356
ANO8	0.375602	0.203575	0.485619	0.295828	0.206686	0.611434	0.642309	-0.0268505	0.299813	0.479031
TUBE1	0.408492	0.443505	0.418905	0.436038	0.414533	0.720907	0.55233	0.654251	0.0526819	0.483678
ARHGEF10L	0.628834	0.612083	0.325428	0.288085	0.45375	0.367918	0.56141	0.602449	0.649957	0.736938
TXK	0.540494	0.381789	0.277617	0.606135	0.77332	0.429944	0.159878	0.140632	0.556076	0.488974
WSCD2	0.324284	0.384383	0.0555874	0.284595	0.269713	0.349354	0.647582	0.51904	0.0630416	0.456658
KCNQ2	0.273541	0.414047	0.056393	0.109787	0.170363	0.115989	0.0693531	-0.0179254	0.0056457	0.575678
TACR2	0.34237	0.336123	0.512301	0.0537901	0.453747	0.533604	0.285392	0.26896	0.0214817	0.631566
ACTR6	0.520146	0.56209	0.521656	0.54813	0.751512	0.671855	0.380928	0.434295	0.165058	0.779246
TIPIN	0.480301	0.430875	0.4964	0.246271	0.316943	0.633922	0.497683	0.388878	0.350464	0.808743
SRI	0.60289	0.638813	0.432052	0.474015	0.759972	0.399374	0.688701	0.853427	0.612386	0.574888
EIF4G3	0.435778	0.359448	0.398595	0.47982	0.463675	0.339322	0.733288	0.36146	0.149312	0.537741
NUP37	0.48262	0.577744	0.498009	0.354153	0.443982	0.647817	0.541601	0.432135	0.238356	0.553116
SEMA3A	0.63175	0.668113	0.634779	0.465061	0.520306	0.702055	0.844425	0.950352	0.415751	0.743111
GTSE1	0.557011	0.584726	0.37875	0.440999	0.59729	0.665995	0.438132	0.798416	0.349644	0.59547
SEMA3C	0.682303	0.616192	0.702997	0.532996	0.620941	0.653005	0.764526	0.466822	0.539811	0.790998
TTC38	0.694478	0.648245	0.508394	0.627086	0.725582	0.475773	0.832229	0.905176	0.386532	0.626149
ACAT1	0.527445	0.522867	0.569459	0.299737	0.491796	0.274822	0.668408	0.53224	0.368705	0.590729
GRAMD4	0.625817	0.550287	0.651466	0.575531	0.631842	0.618789	0.943827	0.544255	0.373314	0.602389
CELSR1	0.638661	0.376468	0.71329	0.495433	0.573716	0.646181	0.380131	0.724377	0.447198	0.323233
WNT8B	0.0586302	0.0161731	-0.0268521	0.0311165	0.0141257	0.0629363	0.369585	-0.112274	0.0570921	0.0886302
ZNF638	0.432385	0.385079	0.539569	0.334424	0.342748	0.545142	0.364772	0.611994	0.247503	0.615707
SLC25A40	0.480101	0.354809	0.515593	0.404182	0.608384	0.671014	0.356303	0.433796	0.289595	0.70616
TIMM21	0.683814	0.36565	0.609778	0.556458	0.69222	0.715808	0.613737	0.952845	0.56773	0.759408
ADD2	0.577518	0.642964	0.518411	0.105699	0.489088	0.654253	0.591803	0.117023	0.162401	0.486056
FGF4	0.449901	0.126664	0.226608	0.0454661	0.622664	0.309185	0.060352	0.359737	0.1471	0.570203
RASAL2	0.626065	0.755344	0.691407	0.544623	0.635073	0.494336	0.569465	0.878124	0.41597	0.621909
VPS9D1	0.347989	0.463	0.302911	0.278493	0.328475	0.190866	0.103672	0.221937	0.209328	0.396264
ZNF37A	0.42613	0.406152	0.291277	0.263718	0.619927	0.560982	0.570071	0.270852	0.221038	0.596847
MARK3	0.6802	0.691107	0.74848	0.595984	0.395293	0.803203	0.770337	0.820196	0.547043	0.630806
SLC25A3	0.606616	0.493631	0.562572	0.603337	0.782544	0.422342	0.494535	0.636028	0.803867	0.696162
FNDC3B	0.716812	0.860127	0.788925	0.614515	0.642538	0.402794	0.804421	0.788715	0.351185	0.785204
FOSL2	0.701143	0.539826	0.75824	0.5146	0.603946	0.679918	0.410432	0.847969	0.417071	0.789066
CACNG5	0.125768	0.144182	0.0589009	0.186193	0.165704	0.110303	-0.010359	-0.000307582	0.0435537	0.141412
CACNG4	0.22307	0.347138	0.0900757	0.145935	0.0583325	0.426404	0.211978	0.35548	0.127993	0.519436
FRYL	0.692845	0.684435	0.635407	0.644208	0.534572	0.523796	0.563681	0.75271	0.496902	0.704929
TMEM131	0.299721	0.138596	0.179428	0.259655	0.427349	0.721642	0.141657	0.375675	0.158585	0.349388
FSCN1	0.790311	0.82587	0.812927	0.703471	0.691662	0.593245	0.824355	0.853163	0.516279	0.79071
MOCOS	0.732633	0.523985	0.766101	0.708515	0.529379	0.501076	0.871494	0.782333	0.627456	0.868254
PLD1	0.720658	0.781677	0.706414	0.627041	0.892292	0.404198	0.59181	0.636303	0.513886	0.671423
ATP12A	0.323671	0.227998	0.321439	0.427737	0.049409	0.28456	0.0630098	0.565077	0.00699266	-0.0146543
WDR62	0.17513	0.0967052	0.110928	0.210235	0.277016	0.113312	0.103667	0.173422	0.0655187	0.174089
DLG1	0.592249	0.691066	0.721301	0.19964	0.63989	0.588285	0.42741	0.930388	0.295487	0.470927
RAB7A	0.555964	0.483884	0.475048	0.399372	0.774709	0.70184	0.638849	0.452528	0.278811	0.246504
BCAP29	0.659859	0.682082	0.65358	0.669414	0.652178	0.841914	0.78681	0.680176	0.228756	0.671698
SEC31B	0.285047	0.271564	0.268791	0.0525959	-0.0510434	0.549925	0.341441	0.82867	0.229006	0.526648
SART3	0.471097	0.325992	0.568467	0.525527	0.476747	0.282487	0.663189	0.348541	0.346459	0.697028
ARHGAP15	0.712524	0.243399	0.698703	0.0419534	0.644827	0.473651	0.703759	0.270931	0.381219	0.776583
PAX2	0.519651	0.278095	0.112258	0.00675549	0.336443	0.482959	0.689574	0.0822828	0.103645	0.260558
KIFAP3	0.616574	0.620981	0.403964	0.410988	0.653033	0.839298	0.940647	0.449666	0.68175	0.48577
MKRN2	0.60039	0.678024	0.548952	0.498681	0.541025	0.463914	0.591539	0.519802	0.504662	0.593439
MCM6	0.473244	0.453065	0.564418	0.0909461	0.699433	0.662321	0.551258	0.272738	0.468494	0.466584
REXO2	0.66243	0.750739	0.667501	0.306071	0.779937	0.414206	0.657586	0.749102	0.64811	0.706588
RBMS2	0.689507	0.64767	0.767391	0.447179	0.471826	0.754933	0.751025	0.749712	0.681605	0.440852
BAZ2A	0.466361	0.399583	0.415102	0.356109	0.389824	0.696099	0.181053	0.552844	0.206043	0.325468
PTPN23	0.391204	0.292031	0.342688	0.362907	0.582639	0.618516	0.634868	0.407105	0.246269	0.335471
MLH1	0.928629	0.976574	0.652136	0.687362	0.759637	0.525733	0.92858	0.919176	0.926277	0.741601
UNG	0.446198	0.507548	0.543024	0.43528	0.649839	0.487092	0.432872	0.290728	0.213487	0.438362
FMO4	0.452782	0.353203	0.384272	0.42982	0.58349	0.303637	0.596564	0.309724	0.24432	0.491195
KLHL20	0.512713	0.481615	0.414632	0.469316	0.605068	0.289038	0.2528	0.843895	0.360761	0.382359
RGS11	0.213549	0.293491	0.0477364	0.108452	0.344454	0.0625311	0.182417	0.13754	0.160185	0.291222
SLC46A1	0.515677	0.57045	0.424184	0.539383	0.452247	0.516876	0.708101	0.533447	0.248035	0.372222
PLXNA2	0.752848	0.856633	0.734468	0.735846	0.682735	0.60318	0.520188	0.894359	0.47082	0.610948
ANKRD13A	0.623352	0.566319	0.497506	0.719332	0.810428	0.596476	0.546456	0.265726	0.425037	0.776245
ACACB	0.613806	0.626985	0.559191	0.308875	0.821599	0.734122	0.742385	0.715759	0.412644	0.71765
TRAF4	0.683724	0.747308	0.669237	0.343849	0.603785	0.677664	0.49203	0.483014	0.532805	0.511752
PAG1	0.728058	0.537593	0.763685	0.665426	0.669332	0.663039	0.483319	0.66707	0.73073	0.721504
GPATCH1	0.543049	0.622516	0.504082	0.570838	0.443354	0.673534	0.655637	0.247325	0.453174	0.663633
ICAM3	0.704828	0.562252	0.760495	0.456296	0.703206	0.666712	0.496018	0.653243	0.688672	0.529544
NT5C2	0.673067	0.756631	0.498033	0.700284	0.549833	0.684462	0.682524	0.273933	0.563747	0.571353
MCAM	0.808011	0.896191	0.601945	0.397365	0.906519	0.739145	0.647542	0.730689	0.291577	0.883669
GPC4	0.701094	0.776568	0.857481	0.538312	0.604988	0.535259	0.349142	0.795093	0.633081	0.776512
MBNL3	0.639477	0.397716	0.500943	0.529612	0.870377	0.773944	0.539924	0.680233	0.282278	0.658475
CAMSAP3	0.618928	0.413527	0.417579	0.293247	0.439196	0.480931	0.574303	0.423021	0.360087	0.150179
RAP1GAP	0.641058	0.536091	0.724311	0.759379	0.387111	0.494156	0.546576	0.618634	0.456777	0.513993
XAB2	0.195618	0.146196	0.209095	0.0989477	0.220293	0.239711	0.149866	0.0965586	0.145391	0.160779
ARHGEF1	0.226926	0.145958	0.19879	0.126809	0.229257	0.33449	-0.00146804	0.074936	0.271699	0.113475
STXBP2	0.476184	0.42391	0.321186	0.29544	0.595253	0.503629	0.778353	0.818073	0.219779	0.126721
MAP2K7	0.212491	0.288835	0.134156	0.149129	0.28991	0.288935	0.103057	-0.147754	0.0394042	0.304755
NMRK2	0.222281	-0.0128473	0.0625038	0.199159	0.71709	0.0261483	0.444509	-0.0673967	-0.00947931	0.251585
DGKD	0.58889	0.380932	0.583649	0.429491	0.323025	0.751809	0.553256	0.585177	0.478091	0.588796
CTTNBP2	0.675228	0.647047	0.719441	0.405499	0.400553	0.528555	0.85227	0.479905	0.548368	0.860299
ACTL6B	0.329556	0.63457	0.118558	0.251043	-0.0429884	0.30117	0.214075	0.152202	0.114397	0.268645
RARB	0.500951	0.356249	0.518898	0.362239	0.700239	0.385347	0.113218	0.570469	0.187794	0.725624
TOP2B	0.543897	0.23296	0.514724	0.466844	0.547379	0.715555	0.539761	0.0816444	0.278404	0.802657
TM9SF3	0.922235	0.533797	0.593214	0.556331	0.676819	0.743064	0.557283	0.90108	0.696961	0.80497
NFKB2	0.500103	0.410111	0.559051	0.412239	0.46626	0.482908	0.584111	0.231379	0.299075	0.405796
UBE2T	0.578844	0.524757	0.505738	0.246244	0.302592	0.516425	0.373575	0.672738	0.267437	0.855227
PPP1R12B	0.488106	0.349963	0.475117	0.588179	0.241519	0.306815	0.200503	0.454312	0.186852	0.82235
DNAJC10	0.584322	0.378361	0.655668	0.469219	0.555985	0.392091	0.572377	0.89688	0.34529	0.891564
GTF3C1	0.504811	0.297422	0.433662	0.600958	0.443327	0.534001	0.33201	0.317515	0.343361	0.589022
IL4R	0.758711	0.51663	0.805376	0.468015	0.477716	0.629361	0.567514	0.188918	0.497248	0.762552
USP33	0.574457	0.436168	0.532736	0.50917	0.617407	0.68538	0.522484	0.855708	0.549615	0.500171
PAK3	0.561025	0.571352	0.491566	0.57282	0.49006	0.301321	0.843313	0.794653	0.113208	0.786749
CAPN6	0.583101	0.535038	0.428487	0.640613	0.143605	0.552995	0.572019	0.748707	0.71981	0.50428
DCX	0.694259	0.606096	0.641995	0.421177	0.885079	0.915951	0.744342	0.349798	0.0118467	0.560178
SNRPA	0.510577	0.480176	0.384076	0.446098	0.523371	0.448589	0.735553	0.580366	0.241229	0.622327
SPAG6	0.713967	0.0590861	0.886639	0.782545	0.149919	0.828292	0.27992	0.0118353	0.0553876	0.526707
EXOSC5	0.536748	0.422415	0.480621	0.575628	0.497419	0.408682	0.388114	0.783943	0.339241	0.619853
APBB1IP	0.741888	0.730711	0.814954	0.498868	0.742667	0.513915	0.815265	0.295932	0.471748	0.828798
FAM76B	0.393277	0.622923	0.316026	0.380681	0.282674	0.524985	0.517816	0.618469	0.0648137	0.54143
SIRT6	0.313163	0.373813	0.0517963	0.23326	0.0822	0.381492	0.404624	0.0903128	0.20693	0.230161
TYR	0.808552	0.0451377	-0.0396819	-0.01248	0.959054	-0.0290709	-0.054832	-0.11977	0.0217679	0.635005
POLD3	0.590189	0.477075	0.593695	0.518861	0.644983	0.722205	0.654272	0.688755	0.385042	0.579409
ACTN2	0.682814	0.76573	0.475212	0.0925375	0.455258	0.269433	0.387747	0.331747	0.16291	0.890376
CAPZB	0.592177	0.686497	0.437162	0.473242	0.800406	0.49132	0.567117	0.66319	0.444765	0.761131
GPR137B	0.702864	0.788877	0.707496	0.661675	0.603019	0.694973	0.614761	0.814484	0.474094	0.614859
NAALAD2	0.650306	-0.00290388	0.355326	0.0263861	0.498494	0.533354	-0.0836549	-0.119621	0.070852	0.77331
JADE1	0.634284	0.559815	0.567763	0.543189	0.70124	0.687611	0.793938	0.719704	0.399067	0.840492
SLC25A43	0.680068	0.547398	0.471221	0.537294	0.728753	0.679909	0.784963	0.641742	0.734429	0.856877
UBE2A	0.658492	0.419145	0.826914	0.600514	0.761222	0.849136	0.73053	0.245886	0.49299	0.679305
FGFR1	0.818943	0.732594	0.834258	0.0992531	0.730629	0.793927	0.556463	0.899792	0.212598	0.608519
FKBP6	0.0865312	-0.0294285	0.115438	0.0328934	0.262492	-0.0112657	0.091591	0.0431564	0.0818919	0.0600923
SMC1B	0.141847	0.182392	0.172579	0.104968	0.260194	0.0241194	0.00959788	0.00698081	0.121993	0.00220268
FBLN1	0.767404	0.780916	0.754296	0.499206	0.618977	0.615185	0.799632	0.843502	0.263802	0.663836
ITGA8	0.831142	0.0907641	0.848279	0.0564824	0.621753	0.669551	0.145804	0.147678	0.186742	0.881881
CST7	0.403761	0.139282	0.404561	0.592287	0.637864	0.458568	0.168411	0.557084	0.382645	0.209845
MAP2	0.761503	0.601236	0.806252	0.605169	0.83056	0.440859	0.698557	0.621247	0.152782	0.8725
PIAS2	0.620733	0.44696	0.484747	0.425211	0.539302	0.770493	0.459312	0.475883	0.378038	0.284402
AMPH	0.693711	0.729115	0.40367	0.0096826	0.661572	0.809869	-0.0174182	0.507813	-0.0498913	0.660934
ARAF	0.385784	0.329421	0.268382	0.270824	0.515074	0.605974	0.455678	0.504833	0.49835	0.376548
MCCC1	0.730167	0.704679	0.764836	0.616782	0.640447	0.87686	0.54698	0.391221	0.722308	0.741136
LAMP3	0.673217	0.689221	0.683703	0.399631	0.50905	0.669809	0.748703	0.115485	0.493799	0.626103
FAP	0.51263	0.479397	0.527539	0.171577	0.266056	0.47037	0.142406	0.50541	0.358764	0.738729
NEBL	0.771448	0.764596	0.739149	0.584562	0.24636	0.216584	0.749501	0.778917	0.737271	0.696736
ACER3	0.701583	0.848051	0.693374	0.658904	0.687608	0.856834	0.742366	0.829219	0.326123	0.688731
UBE2K	0.556514	0.275525	0.745551	0.549633	0.771139	0.703345	0.84823	0.4148	0.510071	0.590685
PIK3C3	0.511125	0.447193	0.37589	0.369543	0.363048	0.675764	0.384738	0.737198	0.314491	0.487605
N4BP2	0.594174	0.605234	0.375893	0.484331	0.728361	0.719068	0.708444	0.904156	0.372676	0.81597
C12orf5	0.684839	0.862723	0.627676	0.598086	0.617119	0.713467	0.80493	0.0334294	0.289956	0.659951
TULP3	0.731745	0.628895	0.483288	0.734835	0.788832	0.858775	0.760623	0.727303	0.519093	0.755411
SYNJ2	0.731465	0.632317	0.494308	0.615092	0.773055	0.507992	0.639917	0.700893	0.621221	0.832608
ADCY2	0.434685	0.434481	0.292567	0.197512	0.605521	0.196708	0.461773	0.482632	0.081949	0.467373
PPP2R5C	0.652794	0.657684	0.662219	0.575275	0.611529	0.742769	0.600716	0.321453	0.490177	0.593118
PMS2P1	0.575256	0.523868	0.293428	0.517096	0.81861	0.645114	0.685524	0.242497	0.306997	0.69954
RBFOX1	0.563857	0.582087	0.0694377	0.100339	0.234971	0.667638	0.0884052	0.0186793	0.293345	0.934541
GNB1	0.54719	0.510305	0.47434	0.593606	0.826573	0.784205	0.513521	0.710779	0.401948	0.774065
HOXA9	0.86755	0.680357	0.547879	0.59764	0.86156	0.869878	0.808449	0.962046	0.897237	0.949689
EDN1	0.75293	0.789726	0.551842	0.60831	0.219108	0.518367	0.746022	0.946986	0.626744	0.531495
MLLT10	0.657663	0.825588	0.661965	0.309095	0.895843	0.64375	0.301188	0.774806	0.265904	0.738418
ZCWPW1	0.325887	0.36933	0.325958	0.120694	0.323634	0.379944	0.397898	0.621849	0.158946	0.51694
ADCYAP1R1	0.362367	0.231714	0.0135469	0.00688837	0.228245	0.325603	0.548657	-0.0927008	0.0342986	0.355322
FGF20	0.628607	0.23293	0.880755	0.645427	0.165549	0.676518	-0.0817827	0.17479	0.475077	0.125293
P2RY10	0.674637	0.808414	0.601226	0.0183581	-0.0538648	-0.0217475	0.937925	-0.012082	0.814336	0.122798
ITM2A	0.708658	0.689612	0.657117	0.812625	0.473422	0.721048	0.913884	0.677739	0.478932	0.638397
NRD1	0.652349	0.598266	0.698606	0.553636	0.734739	0.53956	0.787143	0.776138	0.521105	0.591941
VDAC3	0.742293	0.77128	0.79975	0.812976	0.804447	0.897396	0.843221	0.36544	0.68405	0.439119
PCM1	0.695161	0.573033	0.672311	0.665705	0.660773	0.909217	0.642553	0.893996	0.477604	0.793494
TNRC6C	0.442734	0.339343	0.444195	0.387109	0.220948	0.382358	0.683072	0.175374	0.158463	0.555979
CBFA2T2	0.450345	0.299621	0.503748	0.515953	0.135537	0.298407	0.314903	0.268462	0.376996	0.649687
BRINP1	0.568831	0.189297	0.331013	0.406615	0.177367	0.674832	0.928977	-0.101998	0.383978	0.75042
ITCH	0.525739	0.404907	0.550104	0.300125	0.589304	0.57218	0.842507	0.928185	0.464651	0.771393
PKD2L2	0.0297375	0.0583014	-0.0194015	0.0995385	-0.110059	-0.0845281	-0.00886382	0.130321	0.0668555	0.0485571
TP53INP2	0.543671	0.56367	0.500802	0.369217	0.783118	0.614863	0.744621	0.668087	0.316856	0.737186
SDF4	0.601843	0.734436	0.566088	0.52401	0.682021	0.415582	0.493143	0.845602	0.320979	0.697912
MYH7B	0.355288	0.0130766	0.450475	0.0736184	0.174377	0.190016	-0.0184201	0.012483	0.335074	0.183262
BPIFB2	0.184013	0.0220503	0.257868	0.0965629	0.181192	0.179178	0.263884	-0.0219564	0.194166	0.241373
TP73	0.380727	0.524853	0.418969	0.353656	0.255393	0.106983	0.662517	0.235196	0.077701	0.286191
TOLLIP	0.561625	0.62947	0.464666	0.243283	0.816156	0.611572	0.552155	0.424039	0.264827	0.392358
UBE2D4	0.5027	0.77882	0.479718	0.315764	0.554421	0.44852	0.658942	0.735689	0.306255	0.348003
CLUL1	0.595687	0.517995	0.316804	0.0661297	0.149709	0.832529	0.0666154	0.944715	0.148364	0.368598
RUNX1T1	0.805806	0.595266	0.822568	0.410351	0.59029	0.930919	0.728191	0.728164	0.047162	0.619728
CDH17	0.807548	0.493956	0.516551	0.804024	0.143836	0.325193	0.0327817	0.940953	0.935067	0.478136
THOC1	0.432627	0.462647	0.553911	0.300035	0.414112	0.590417	0.435381	0.201496	0.228408	0.502073
FKBP7	0.741663	0.654689	0.506446	0.345537	0.663944	0.699727	0.54286	0.278557	0.436215	0.813159
OSBPL6	0.778206	0.721566	0.59903	0.377598	0.553897	0.96555	0.599714	0.962649	0.454872	0.863358
SLC1A3	0.762585	0.771078	0.746337	0.761008	0.757971	0.601406	0.52558	0.499994	0.290876	0.4173
XRCC5	0.595935	0.510655	0.589114	0.324654	0.872052	0.288901	0.636292	0.507807	0.59351	0.814123
LXN	0.820535	0.767773	0.710075	0.741765	0.947551	0.700773	0.965612	0.959745	0.541466	0.884629
SP140	0.644757	0.0315286	0.687928	0.33976	0.0136702	0.453914	0.907986	-0.0825746	0.585052	0.477691
MKNK1	0.379	0.517739	0.366736	0.346876	0.160776	0.378086	0.330624	0.775349	0.259969	0.559638
TNS1	0.699597	0.624334	0.524619	0.405037	0.866387	0.508222	0.917787	0.45692	0.368648	0.735812
REXO1	0.143994	0.123578	0.226586	-0.0223967	0.123201	0.105636	-0.0503853	0.00876332	0.143697	0.507263
SAR1A	0.646688	0.616094	0.722179	0.830797	0.608883	0.418028	0.430301	0.873008	0.411891	0.703481
CDC14A	0.428654	0.218011	0.303778	0.139431	0.238183	0.367702	0.279084	0.853344	0.304163	0.622965
RAPGEF3	0.388568	0.0773796	0.122833	0.284146	0.436832	0.706413	0.31919	0.403265	0.104139	0.0739805
CEACAM1	0.743939	0.769498	0.448755	0.311856	0.802698	0.646266	0.537393	0.659353	0.49144	0.711693
SENP1	0.370255	0.328194	0.325995	0.304418	0.446547	0.39624	0.122714	0.343442	0.207062	0.424113
DUSP13	0.469308	0.373139	0.617315	0.259541	0.236023	0.365527	0.381086	0.109908	0.123813	0.723354
CIC	0.252547	0.2282	0.259238	0.205556	0.0925016	0.390211	0.228902	0.522028	0.137765	0.390241
LIPE	0.333727	0.412516	0.175166	0.243483	0.361589	0.389873	0.470682	0.500644	0.150153	0.322943
FDFT1	0.737262	0.758708	0.745997	0.632251	0.252923	0.750461	0.579211	0.93328	0.822314	0.812832
PAFAH1B3	0.643042	0.64599	0.551983	0.611004	0.649208	0.256572	0.689079	0.575076	0.287975	0.717617
AFM	0.524979	0.0303521	0.63437	0.0344214	0.0679821	0.0285029	0.0749234	-0.0214879	0.0793139	0.0403693
KIF22	0.505034	0.41535	0.569928	0.293047	0.485619	0.431476	0.555273	0.429995	0.381109	0.505917
SCGN	0.530163	0.512963	0.66736	0.512127	0.366985	0.327237	0.479907	0.633895	0.141135	0.319427
LRRC16A	0.534934	0.541487	0.339913	0.591171	0.556464	0.478318	0.504933	0.38301	0.395209	0.268208
PGM1	0.374695	0.545779	0.563894	0.569672	0.84159	0.117963	0.746649	0.892861	0.22577	0.608328
DDX1	0.6737	0.723251	0.814594	0.672337	0.684844	0.730616	0.56711	0.428555	0.486413	0.537499
DNM2	0.651679	0.519471	0.495212	0.494944	0.431668	0.718607	0.397181	0.711159	0.399033	0.634139
EPB41L2	0.818488	0.811375	0.829359	0.609913	0.62956	0.529244	0.826248	0.599033	0.871189	0.795323
RIMS1	0.401	0.604747	0.237241	0.148363	0.176761	0.0480156	0.279252	-0.147403	0.114602	0.280232
MOXD1	0.757367	0.422295	0.718882	0.599564	0.741591	0.875611	0.461471	0.303102	0.420397	0.727216
STX7	0.724257	0.719275	0.525226	0.691829	0.891357	0.50746	0.773485	0.650321	0.466497	0.625756
KEAP1	0.637789	0.490258	0.838286	0.623658	0.688239	0.686083	0.683827	0.484227	0.245551	0.512803
DDX43	0.871146	0.924808	0.859662	0.842508	0.919862	0.949218	0.769833	0.746764	0.847936	0.950455
PTPRH	0.708932	0.11838	0.494138	0.33327	0.536525	0.639542	0.424797	0.936422	0.47277	0.788388
DCT	0.720455	0.423145	0.0552701	0.00345304	0.899758	0.26854	-0.054678	-0.0205702	0.137297	0.882855
SLC35C2	0.609672	0.636793	0.731068	0.39937	0.679207	0.690041	0.752382	0.0892897	0.542389	0.600318
CRYBG3	0.689631	0.747672	0.721454	0.558576	0.759305	0.686595	0.682787	0.666365	0.547505	0.481206
EPHA6	0.486121	0.132821	0.438802	0.198511	0.459653	0.0786611	0.773493	0.0587103	0.0353952	0.682798
SCTR	0.366742	0.151721	0.0483245	0.571911	0.25615	0.0594793	0.479233	0.0451032	0.156869	0.124502
RFX3	0.550323	0.387963	0.471863	0.474541	0.647207	0.562166	0.831555	0.670442	0.201338	0.561271
RIF1	0.435292	0.49931	0.323021	0.336577	0.564623	0.594776	0.547363	0.0570851	0.330003	0.443664
RAB21	0.546773	0.643576	0.354679	0.644517	0.726129	0.7362	0.801219	0.618577	0.286163	0.747315
SLC4A4	0.804103	0.530418	0.436947	0.763493	0.729404	0.615152	0.800526	0.83323	0.592109	0.654668
SMARCA2	0.794243	0.564966	0.858018	0.637457	0.730506	0.622466	0.749732	0.928074	0.719364	0.870905
RDH8	0.1147	0.108338	-0.0400627	-0.0677365	0.646945	0.0391782	0.166151	-0.0514434	-0.0115131	0.269665
SESN1	0.655042	0.784839	0.425212	0.487432	0.669871	0.785153	0.686328	0.437928	0.610042	0.736263
MID2	0.548725	0.51887	0.575126	0.243512	0.641785	0.376705	0.386899	0.604542	0.293688	0.440451
PIH1D3	0.103309	0.0910814	-0.00220065	-0.0062323	0.102118	0.541802	0.0541877	-0.140758	0.00121618	0.0506561
COL5A3	0.548855	0.501768	0.374002	0.136474	0.501475	0.231257	0.59393	-0.103561	0.199189	0.770012
KIAA0020	0.639483	0.789707	0.646563	0.432219	0.694519	0.360077	0.450327	0.498291	0.63441	0.604675
CPB2	0.813844	0.940251	0.843156	-0.0218525	0.694557	0.485871	0.0391451	-0.101038	0.41159	0.0868108
CHRNA3	0.488999	0.113913	0.16089	0.110921	0.5614	0.237298	0.311955	0.223186	-0.0281183	0.23606
KCNN2	0.769967	0.48838	0.310182	0.429213	0.813032	0.627206	0.232896	0.44426	0.742787	0.77667
CNOT4	0.443252	0.362638	0.335681	0.357835	0.308843	0.457911	0.660141	0.623789	0.243367	0.631172
PSEN1	0.587186	0.288683	0.341521	0.464358	0.758723	0.870996	0.52145	0.428153	0.362803	0.658991
CPOX	0.501675	0.538932	0.597349	0.352196	0.564676	0.722387	0.624905	0.0799482	0.22373	0.500918
CLDND1	0.546535	0.576116	0.611752	0.473131	0.664109	0.720624	0.525714	0.350475	0.135912	0.455671
MOK	0.721954	0.665883	0.623579	0.746267	0.800799	0.721052	0.678287	0.397759	0.654224	0.472902
HSP90AA1	0.662381	0.528138	0.620387	0.407645	0.728652	0.745117	0.610555	0.40794	0.407943	0.575353
RBL1	0.435909	0.510544	0.366084	0.177676	0.508919	0.252247	0.587598	0.195818	0.219503	0.378708
DLGAP4	0.518153	0.418152	0.578675	0.300947	0.373464	0.594417	0.312936	0.249282	0.393976	0.69795
CROCCP3	0.0908858	0.0617995	0.0415561	0.0384695	0.262889	0.117428	0.21393	-0.0926429	-0.00377747	0.202929
NDC80	0.440419	0.465923	0.37656	0.307085	0.17108	0.564989	0.436187	0.259162	0.370565	0.79165
AP4E1	0.432983	0.494086	0.243476	0.339687	0.783432	0.649829	0.505918	0.53747	0.277629	0.484297
RSBN1	0.551684	0.488236	0.51507	0.546511	0.280643	0.750139	0.702211	0.725236	0.461156	0.71733
MAGI3	0.551797	0.573137	0.539111	0.536985	0.331913	0.407639	0.291226	0.579802	0.374056	0.6479
CXCL2	0.686231	0.663528	0.76789	0.446925	0.488149	0.711274	0.545669	0.271201	0.418997	0.732185
AFP	0.565338	0.623406	0.68403	0.665453	0.887419	0.62455	-0.00229498	0.258055	0.0326971	0.626103
COL4A4	0.642159	0.548328	0.593426	0.754923	0.698271	0.461437	0.771668	-0.0104105	0.641368	0.582487
TCF7	0.602992	0.187587	0.644418	0.628647	0.531626	0.594774	0.357457	0.394103	0.58032	0.587568
OSTM1	0.643438	0.623867	0.493874	0.598854	0.758961	0.624674	0.675073	0.492231	0.125224	0.699294
CDH7	0.508925	0.240888	0.180202	0.207217	0.877945	0.891001	0.116928	0.0633059	0.367659	0.764027
IMPG2	0.506232	0.408073	0.146957	0.0991607	0.148021	0.550855	0.36985	0.408048	0.0610858	0.188687
PCNP	0.43562	0.552576	0.595964	0.230044	0.466849	0.496996	0.522374	0.366611	0.264427	0.542935
EXD2	0.535143	0.476893	0.548911	0.584777	0.412918	0.730349	0.50349	0.502718	0.318083	0.648307
ARG2	0.513693	0.602197	0.638009	0.532645	0.759691	0.519978	0.462582	0.279157	0.215528	0.609609
MEF2C	0.741403	0.690465	0.670222	0.337975	0.760835	0.350451	0.714433	0.0935437	0.266492	0.703271
PTPRC	0.813036	0.906402	0.580042	0.00101636	0.20975	0.678979	0.987632	-0.0536618	0.932665	0.487943
CACNA1S	0.109093	0.0781833	0.0954743	0.078166	0.11655	0.0577055	0.041162	0.0925238	0.0539984	0.309513
PKP1	0.824202	0.53338	0.90997	0.809031	0.614628	0.141191	0.803296	0.983395	0.698333	0.317099
UBA5	0.589693	0.790999	0.541973	0.416383	0.64901	0.65731	0.781318	0.0869404	0.439264	0.685992
STK17B	0.627702	0.430335	0.572574	0.432864	0.653809	0.572305	0.84314	0.812642	0.315436	0.834159
CDC14B	0.542848	0.187851	0.421148	0.3644	0.486729	0.424179	0.643851	0.643262	0.404024	0.640717
ZNF510	0.446456	0.604199	0.346599	0.172853	0.266142	0.509438	0.625565	0.476503	0.20643	0.604059
LRP2	0.710246	0.599234	0.643983	-0.00353449	0.695807	0.733957	0.948897	0.0258156	0.717621	0.187797
JMJD4	0.639282	0.717385	0.434574	0.385187	0.717497	0.630385	0.537865	0.841756	0.41576	0.447632
DUSP12	0.560798	0.578876	0.581226	0.476844	0.533558	0.683389	0.750067	0.644777	0.287839	0.705134
AACS	0.559998	0.732112	0.574787	0.712904	0.668505	0.379904	0.617602	0.656025	0.542393	0.219075
KIAA0141	0.588696	0.503189	0.459657	0.435532	0.637338	0.63863	0.729018	0.216462	0.34415	0.544279
SLC13A1	0.950327	0.0312031	0.0625355	0.0124185	-0.0800974	0.0209821	0.96502	0.249847	-0.0078866	0.938031
CADPS2	0.71954	0.725927	0.758488	0.638625	0.777204	0.439119	0.701131	0.864195	0.683701	0.710838
HSPB11	0.626965	0.394479	0.671939	0.580629	0.87337	0.84401	0.805521	0.441215	0.491099	0.706087
PHLPP1	0.659531	0.564525	0.587278	0.414618	0.671933	0.734138	0.776529	0.482723	0.461337	0.625685
ATP8B1	0.817916	0.715332	0.895119	0.248213	0.654134	0.688981	0.770207	0.886053	0.95703	0.501542
IL12RB2	0.718457	0.830812	0.586129	0.581145	0.786212	0.0758913	0.514086	0.759656	0.651914	0.659284
SMARCD3	0.686412	0.52114	0.420667	0.466852	0.69862	0.695738	0.796798	0.752467	0.277919	0.875984
WDR70	0.570511	0.535084	0.501601	0.291328	0.677251	0.544773	0.549732	0.883067	0.441223	0.693241
FYB	0.524447	0.485374	0.511895	0.630496	0.516975	0.661917	0.342857	0.139161	0.32875	0.349237
MPP4	0.322544	-0.107269	0.234358	0.0152243	0.484373	-0.0426606	0.125951	0.146235	0.033097	0.42624
BZW1	0.522096	0.764842	0.433788	0.465441	0.497275	0.390427	0.499437	0.545274	0.325371	0.669914
PGR	0.479102	0.369246	0.283174	0.0901495	-0.0752981	0.129831	0.0231307	0.370092	0.822187	0.586396
ME2	0.749765	0.56858	0.614846	0.855527	0.760608	0.565649	0.417225	0.693166	0.805969	0.775889
C5orf22	0.565293	0.576188	0.528662	0.374699	0.802697	0.434392	0.446811	0.177756	0.242054	0.676268
CCNT2	0.410055	0.399434	0.382271	0.543747	0.379156	0.380728	0.541232	0.270563	0.166776	0.609729
FAM135A	0.458846	0.433904	0.387306	0.619199	0.304352	0.220916	0.269283	0.58931	0.106246	0.53841
COL19A1	0.111451	0.114697	0.0409211	0.075082	0.0433363	0.293544	0.0787236	0.127026	0.00271166	0.266793
EPB41L3	0.70497	0.546036	0.606165	0.882788	0.690452	0.921726	0.279058	0.985861	0.79367	0.767996
COBLL1	0.623951	0.70958	0.732688	0.460299	0.548557	0.620098	0.685099	0.478655	0.405519	0.459112
DLG3	0.74508	0.63802	0.610292	0.409491	0.410234	0.541269	0.757045	0.386042	0.561409	0.703377
KCNK2	0.425213	0.521362	0.26245	0.509271	0.766352	0.279164	0.288764	0.474796	0.011217	0.695042
SERTAD4	0.758612	0.668774	0.61861	0.580228	0.530137	0.583921	0.698851	0.675678	0.553607	0.720024
TRAF5	0.594249	0.53817	0.433385	0.415832	0.656741	0.624479	0.558393	0.296437	0.556878	0.725399
MRPL22	0.544174	0.452312	0.528453	0.552698	0.444955	0.755049	0.409582	0.718857	0.602874	0.605711
GEMIN5	0.601221	0.530013	0.579596	0.361408	0.694556	0.664052	0.420241	0.444689	0.526143	0.743986
OPRK1	0.697677	0.647028	0.681044	0.265291	0.335016	0.722757	0.68469	0.978841	-0.0408229	0.577098
NFE2L1	0.497275	0.441501	0.407474	0.468256	0.275531	0.795891	0.63194	0.293445	0.375464	0.442277
SEMA5B	0.45516	0.574448	0.245072	0.118829	0.00577941	0.194245	0.728836	0.00755138	0.0653446	0.566171
GSK3B	0.454477	0.413741	0.596335	0.43492	0.50322	0.54104	0.622433	0.23102	0.317176	0.433591
ITGB5	0.737974	0.681021	0.844059	0.795001	0.802498	0.381579	0.92685	0.845125	0.511602	0.583721
ERC1	0.608227	0.524671	0.473398	0.550735	0.561752	0.281564	0.709349	0.612628	0.433397	0.564962
XPO1	0.42325	0.339475	0.564591	0.310152	0.426213	0.537576	0.501619	0.169302	0.162531	0.368603
C4orf6	0.349373	0.100549	0.107833	0.0280801	0.258268	0.0231285	0.564911	0.0239796	0.106093	0.106624
RNF13	0.592438	0.615168	0.595344	0.347642	0.420788	0.635768	0.484852	0.340734	0.524069	0.540793
TRPM3	0.702634	0.206218	0.732873	0.0330589	0.636546	0.374061	0.789258	0.175366	0.502372	0.805634
PALB2	0.705821	0.694141	0.686121	0.515759	0.864633	0.879024	0.497811	0.738614	0.437103	0.591292
DOPEY1	0.515595	0.539985	0.338533	0.663806	0.404261	0.518778	0.422515	0.902353	0.266543	0.623783
LYRM2	0.330174	0.33772	0.272206	0.300044	0.393108	0.216656	0.203114	0.000337006	0.19371	0.490659
BCKDHB	0.605384	0.622742	0.574355	0.528041	0.420257	0.487395	0.677016	0.526561	0.319026	0.661537
KAT6A	0.63268	0.542775	0.797312	0.622038	0.427755	0.603487	0.531688	0.549662	0.499233	0.895537
ZCCHC6	0.613714	0.529192	0.724214	0.506838	0.640067	0.412915	0.647127	0.796267	0.317561	0.674612
ULK2	0.712848	0.68261	0.449459	0.339256	0.500975	0.911133	0.702586	0.667583	0.455926	0.792325
GRHL2	0.78305	0.471721	0.856549	0.517154	0.225286	0.646662	0.742114	0.533936	0.50844	0.156359
TNPO1	0.540124	0.546609	0.623531	0.476122	0.817005	0.843444	0.534019	0.47563	0.141623	0.671298
PLOD1	0.770097	0.744564	0.76227	0.648502	0.777513	0.53756	0.748807	0.842111	0.592814	0.913711
ITGAE	0.534201	0.493255	0.428519	0.451493	0.488477	0.628115	0.690408	0.460887	0.286891	0.641758
DIS3	0.560366	0.602988	0.523559	0.43408	0.575683	0.597366	0.380274	0.705297	0.452797	0.645942
PIBF1	0.483789	0.57724	0.406021	0.412576	0.51616	0.710632	0.522721	0.566368	0.279681	0.73215
TDRD3	0.659889	0.451992	0.589904	0.567425	0.563845	0.679652	0.597971	0.475588	0.519173	0.687087
NUFIP1	0.519659	0.513829	0.4436	0.268852	0.731608	0.683149	0.580346	0.736099	0.454312	0.660756
PDS5B	0.468611	0.293383	0.228303	0.356039	0.566529	0.437992	0.521353	0.114703	0.242558	0.384439
OXCT1	0.738247	0.824918	0.779675	0.757859	0.867343	0.705657	0.481284	0.686358	0.691262	0.749933
RRAGB	0.472959	0.601415	0.526473	0.256834	0.63549	0.582952	0.279927	0.130763	0.24711	0.516563
EPYC	0.440167	0.818505	-0.0322229	-0.0181343	0.893395	0.883751	-0.0674074	0.281218	-0.0408678	0.210481
CYLD	0.533487	0.610948	0.329137	0.603476	0.688013	0.552523	0.457268	0.863658	0.469874	0.460783
SLC27A5	0.334643	0.508636	0.222987	0.312285	0.430308	0.319503	0.109226	0.395868	0.308651	0.34397
ZNF324	0.407191	0.398368	0.444939	0.317088	0.336608	0.5043	0.507262	0.538043	0.211051	0.38549
ZNF671	0.419397	0.401505	0.375908	0.32849	0.393547	0.262277	0.55089	0.318807	0.121854	0.486217
ZNF416	0.422514	0.537473	0.379711	0.0656782	0.519838	0.284091	0.794836	0.574824	0.430432	0.398138
ZNF586	0.670486	0.833027	0.70131	0.440558	0.417332	0.75424	0.700862	0.236663	0.702209	0.678634
ZNF446	0.280597	0.352495	0.202876	0.202827	0.319926	0.496734	0.411491	0.252497	0.169875	0.463005
ZNF264	0.530762	0.485776	0.485754	0.127214	0.304534	0.346377	0.415137	0.47339	0.64854	0.618133
FAT1	0.571459	0.918166	0.901125	0.331347	0.543528	0.344365	0.988217	0.5521	0.925443	0.249766
YTHDC1	0.411869	0.343933	0.368056	0.393973	0.264002	0.572064	0.35258	0.895819	0.25201	0.588427
CHMP2B	0.65474	0.435885	0.505021	0.811577	0.799177	0.428759	0.80856	0.432659	0.543962	0.613974
SMAP2	0.592504	0.506445	0.632457	0.461912	0.319572	0.619991	0.636698	0.960582	0.492491	0.576296
PPIE	0.668894	0.623962	0.71237	0.624649	0.755661	0.608387	0.85686	0.96985	0.464073	0.734114
ZMPSTE24	0.535639	0.520119	0.635998	0.65555	0.50635	0.488254	0.242472	0.898169	0.342895	0.710377
STARD7	0.539233	0.383153	0.538937	0.220457	0.545792	0.314768	0.586427	0.544011	0.434604	0.497335
NOA1	0.645704	0.570811	0.562578	0.546729	0.527748	0.7806	0.60352	0.616245	0.666218	0.602926
REST	0.260778	0.195089	0.111117	0.169943	0.229501	0.432762	0.0580045	0.0474986	0.12679	0.34039
HAL	0.646294	0.290548	0.671087	0.713051	0.93217	0.587508	0.222964	0.553982	0.231664	0.285799
SSH1	0.500719	0.264745	0.450907	0.352432	0.765732	0.272759	0.463954	0.431636	0.375373	0.489124
GSTP1	0.837385	0.945223	0.799023	-0.0503791	0.961964	0.869783	0.471687	0.691907	0.842936	0.670772
APLP2	0.849956	0.51123	0.91838	0.650239	0.774499	0.71455	0.909237	0.766384	0.662077	0.753032
KIAA1467	0.542693	0.597507	0.439256	0.316417	0.587563	0.749107	0.324417	0.510553	0.275813	0.448864
SLCO1A2	0.31613	0.553427	0.218407	0.135141	0.202916	0.17837	0.840862	0.164749	0.153171	0.00399209
WBP11	0.552411	0.825996	0.304144	0.522484	0.811201	0.575566	0.528172	0.759255	0.352259	0.741741
EIF3I	0.535321	0.562214	0.54847	0.68991	0.800376	0.329765	0.43536	0.61551	0.351442	0.640143
NKAIN1	0.32224	0.586982	0.148293	-0.0169611	0.549937	0.513319	-0.0439163	0.376779	0.065705	0.28178
COL16A1	0.691188	0.736898	0.758302	0.45508	0.730021	0.592367	0.647732	0.605791	0.601866	0.618393
TXLNA	0.492048	0.281522	0.385912	0.546629	0.59845	0.599243	0.562176	0.636108	0.344699	0.617303
APOB	0.702291	0.0153014	0.882995	0.384309	0.944987	0.858273	0.520104	0.910149	0.361651	0.0626268
NCOA1	0.531655	0.580485	0.51193	0.703617	0.633554	0.428221	0.440832	0.389786	0.32514	0.478377
AGBL5	0.636565	0.788768	0.534618	0.233302	0.71067	0.563981	0.715754	0.484568	0.334773	0.648519
EFR3B	0.438511	0.250907	0.334249	0.228473	0.424862	0.500372	0.409366	0.462291	0.242959	0.308871
KIF3C	0.650881	0.802539	0.587405	0.34726	0.847191	0.599265	0.566025	0.216737	0.180198	0.609394
RAB10	0.576449	0.451822	0.754793	0.524857	0.66403	0.79479	0.0890868	0.664618	0.259762	0.602935
GCKR	0.343706	0.0686176	0.341062	0.397596	0.115962	0.253286	0.247065	0.434808	0.0110629	0.313841
HADHA	0.631598	0.598187	0.468962	0.706604	0.702375	0.692068	0.723989	0.872009	0.424341	0.799625
MAPRE3	0.398935	0.411786	0.26033	0.118011	0.545152	0.424645	0.524009	0.676545	0.286993	0.453541
CAD	0.548971	0.6096	0.473524	0.424266	0.516402	0.550344	0.563141	0.567289	0.222233	0.645954
CD59	0.743724	0.745233	0.611908	0.849703	0.76719	0.767374	0.504708	0.623347	0.650447	0.489707
CD82	0.680882	0.514095	0.718824	0.652551	0.592025	0.334453	0.332081	0.844491	0.634346	0.656395
BCORL1	0.263566	0.212295	0.25999	0.173659	0.151043	0.106382	0.383064	0.344432	0.207226	0.424524
ATRX	0.523518	0.676056	0.426587	0.23168	0.62606	0.627357	0.860183	0.566135	0.14458	0.95674
TAF9	0.571932	0.533554	0.574389	0.579825	0.599794	0.559624	0.392317	0.755061	0.522683	0.575235
FCN1	0.0384523	0.0880722	-0.00788359	0.00178218	0.00924331	-0.0108143	0.1491	0.463605	0.0601253	-0.0592747
MYNN	0.511015	0.479795	0.452478	0.524854	0.53564	0.800113	0.801746	0.191537	0.301718	0.729063
MECOM	0.901483	0.6997	0.711562	0.856131	0.866664	0.85067	0.939645	0.865214	0.731268	0.807528
SCAMP1	0.462406	0.469869	0.475501	0.374166	0.454334	0.560311	0.548707	0.579092	0.228683	0.538709
PREP	0.769453	0.704402	0.659307	0.752136	0.661061	0.80976	0.799459	0.693771	0.653874	0.70781
HACE1	0.573364	0.478463	0.423321	0.418008	0.358947	0.847514	0.590696	0.677155	0.376586	0.639306
SEH1L	0.582955	0.455401	0.555582	0.596714	0.585825	0.457355	0.741419	0.799588	0.419518	0.837923
WDR47	0.593268	0.444057	0.589232	0.454369	0.671931	0.754251	0.556692	0.667423	0.238189	0.54659
WDFY1	0.663574	0.652113	0.684945	0.650155	0.842353	0.665711	0.239545	0.189152	0.65233	0.742668
OVGP1	0.391231	0.385378	0.234532	0.24694	0.0970521	0.444467	0.476195	0.114961	0.331906	0.172346
SLC25A24	0.497289	0.291316	0.302951	0.650193	0.222126	0.510744	0.451434	0.510679	0.284808	0.594085
MAP3K4	0.698154	0.767859	0.705542	0.710891	0.654341	0.763727	0.730284	0.501619	0.325219	0.677233
PILRA	0.295504	0.108586	0.237676	0.209258	0.17007	0.379553	0.656557	0.406092	0.120875	0.218297
IGSF9	0.721893	0.721226	0.780889	0.450693	0.00589002	0.141635	0.352751	0.451573	0.483893	0.211597
ABCB1	0.781764	0.0942322	0.74636	0.413304	0.924204	-0.0478159	0.794217	-0.0160861	0.687097	0.777592
ZNF213	0.423146	0.557612	0.228762	0.313768	0.58435	0.416847	0.709745	0.105944	0.337124	0.562233
AKR1B1	0.79988	0.674393	0.93196	0.663883	0.921317	0.395161	0.687685	0.652413	0.623881	0.827988
CPNE3	0.614864	0.774588	0.438538	0.594545	0.562867	0.928096	0.510127	0.282728	0.463155	0.723374
RRN3	0.436232	0.657809	0.439295	0.444013	0.502256	0.591868	0.519894	0.486103	0.155227	0.530861
CTTN	0.742098	0.525311	0.724681	0.456416	0.734501	0.762143	0.827329	0.968374	0.557353	0.70556
WNT11	0.565301	0.544184	0.506373	0.647629	0.560188	0.665926	0.421435	0.681559	0.368915	0.8068
MTIF2	0.527853	0.489836	0.490249	0.349967	0.599521	0.382456	0.610522	0.577261	0.418136	0.478904
DDHD2	0.683026	0.782413	0.609332	0.717438	0.581911	0.708914	0.709957	0.776507	0.675402	0.685355
TTC39A	0.484192	0.472387	0.45275	0.54154	0.575205	0.550852	0.553926	0.319922	0.100121	0.250286
EPS15	0.601778	0.583497	0.418361	0.661571	0.772893	0.776328	0.583971	0.899102	0.246665	0.723093
ORC1	0.539234	0.407298	0.597175	0.29052	0.398355	0.343316	0.667364	0.598817	0.526355	0.424149
MGST2	0.8514	0.726121	0.585829	0.661761	0.748606	0.628818	0.692047	0.58475	0.746321	0.753277
ATG16L1	0.525915	0.41679	0.471176	0.475501	0.62701	0.342146	0.736204	0.342815	0.41005	0.221521
USP40	0.539097	0.444941	0.665429	0.365405	0.23994	0.478416	0.600349	0.495443	0.359291	0.614542
POMGNT1	0.495043	0.348585	0.43869	0.475853	0.648243	0.541774	0.390727	0.246796	0.317216	0.452696
RAD54L	0.510613	0.407075	0.562639	0.256455	0.244238	0.539613	0.463324	0.559428	0.332499	0.305909
MAST2	0.454462	0.382512	0.415948	0.400872	0.652645	0.591615	0.661706	0.325077	0.20584	0.571608
DNAJA1	0.468885	0.487493	0.556211	0.276049	0.497607	0.379404	0.346773	0.0266021	0.472232	0.69034
B4GALT1	0.55472	0.512239	0.560483	0.536262	0.353739	0.523203	0.471775	0.202211	0.335692	0.661906
CHMP5	0.366578	0.299279	0.547706	0.427113	0.500864	0.653136	0.295535	0.526293	0.098781	0.684046
NFX1	0.560075	0.52011	0.645895	0.688632	0.500856	0.398673	0.574246	-0.0408422	0.338658	0.662061
AQP6	0.150461	0.173332	0.0525581	0.237996	0.0311524	0.382081	0.112855	0.220339	0.0530992	0.0884697
DIMT1	0.564436	0.616938	0.456256	0.512744	0.635431	0.70501	0.215046	0.867531	0.50532	0.640997
IPO11	0.367867	0.407907	0.151375	0.527921	0.418308	0.332234	0.480253	0.639283	0.180883	0.680015
FOLH1	0.754423	0.766125	0.849196	0.0984076	0.651483	0.706611	-0.0205977	0.49104	0.899828	0.300203
EIF2AK1	0.53895	0.606375	0.425803	0.438843	0.65102	0.678315	0.750839	0.33933	0.43619	0.629812
EPDR1	0.787724	0.757104	0.8269	0.738442	0.554915	0.587876	0.912262	0.565631	0.840944	0.95926
SNX10	0.715621	0.802826	0.680231	0.634447	0.874813	0.605246	0.909826	0.626026	0.608283	0.53683
SEPHS1	0.673486	0.720355	0.551082	0.471798	0.703931	0.701583	0.81081	0.836929	0.488857	0.630671
MRPL28	0.456603	0.623672	0.431893	0.422317	0.458195	0.643834	0.622428	0.795595	0.223519	0.297708
HBQ1	0.19146	0.289508	0.242309	0.00676585	0.369254	0.07246	0.131381	0.101651	0.0662594	0.268963
ITPKC	0.586031	0.498763	0.579802	0.313844	0.449846	0.791806	0.599408	0.637972	0.275621	0.477456
CEACAM6	0.748375	0.809244	0.439512	0.037347	0.804857	0.797894	0.128977	0.755776	0.753638	0.229189
FAT2	0.667497	0.362014	0.800469	0.653183	0.415372	0.344712	0.775529	0.927601	0.534496	0.236733
RBM22	0.645831	0.694155	0.603079	0.472396	0.876181	0.556132	0.410503	0.695046	0.58332	0.475823
TMED2	0.350446	0.522048	0.563234	0.095327	0.181982	0.748271	0.215856	0.501785	0.272138	0.189023
ERO1LB	0.630956	0.490194	0.485119	0.614485	0.587063	0.571108	0.480567	0.481628	0.615697	0.583915
HSD17B2	0.809563	0.674763	0.75438	0.915939	0.775714	0.559439	0.539092	0.972754	0.491733	0.693136
TXLNG	0.628478	0.738676	0.607976	0.576919	0.515332	0.558011	0.330781	0.611701	0.546549	0.327836
PPEF1	0.636809	0.266515	0.382316	0.0418636	0.884028	0.102983	0.583192	-0.0066819	-0.0401013	0.904264
LAT2	0.372334	0.226153	0.475688	0.116301	0.387977	0.307776	0.29088	0.270551	0.380744	0.0643683
HUWE1	0.352314	0.354212	0.333088	0.250908	0.564409	0.403699	0.377456	0.431764	0.321701	0.359536
ZW10	0.546319	0.738781	0.561316	0.320235	0.52842	0.423564	0.652974	0.708935	0.301227	0.653514
ALG9	0.540478	0.501868	0.308151	0.414656	0.50168	0.772543	0.774508	0.687451	0.402161	0.776665
MYBPC2	0.422579	0.271936	0.160135	0.119441	0.0268004	0.714716	0.587495	0.224148	0.111624	0.777463
NOX4	0.742645	0.718267	0.429399	-0.00757337	0.739292	0.572864	0.681324	0.451338	0.0572707	0.825422
ACOX3	0.599786	0.73799	0.619076	0.457338	0.646977	0.385221	0.498515	0.317252	0.382454	0.725138
MTMR2	0.662375	0.855538	0.69433	0.661026	0.520468	0.623476	0.655709	0.61387	0.305644	0.584385
PPP1R15A	0.401841	0.354474	0.290193	0.212323	0.556285	0.38819	0.31163	0.716811	0.270544	0.690021
HSD17B14	0.597986	0.481801	0.587452	0.177228	0.655068	0.387116	0.620627	0.135707	0.277763	0.402052
TRIP6	0.717726	0.550146	0.648328	0.903802	0.855932	0.383291	0.716195	0.984821	0.757522	0.659915
ACHE	0.396702	0.253112	0.301817	0.511356	-0.052663	0.17254	0.0332869	0.455097	0.316139	0.107923
FTL	0.424557	0.599296	0.525304	0.379977	0.466131	0.18015	0.672104	0.592406	0.214106	0.277708
SRRT	0.43829	0.290758	0.363647	0.514891	0.477063	0.395726	0.610742	0.586296	0.18848	0.530198
BAX	0.471579	0.41888	0.397819	0.30006	0.624262	0.750294	0.579197	0.488377	0.279551	0.673737
NLK	0.426336	0.505842	0.323869	0.436622	0.632588	0.681862	0.586919	0.830469	0.118978	0.615616
ADAMTS2	0.580634	0.540682	0.327797	0.456266	0.453554	0.175028	0.306195	0.324931	0.282559	0.779454
TMPRSS11E	0.679053	0.335138	0.535216	0.815695	0.188793	0.259801	0.844422	0.60605	0.514466	0.63842
ATXN7L3	0.469389	0.267862	0.356383	0.306082	0.229439	0.507133	0.573945	0.764424	0.481647	0.542672
PGS1	0.411312	0.230373	0.345168	0.220139	0.504697	0.809372	0.595112	0.470924	0.401184	0.405099
PSMC5	0.623856	0.487284	0.73034	0.659336	0.636902	0.649833	0.678135	0.348993	0.544167	0.800028
UIMC1	0.678747	0.665018	0.750134	0.356857	0.507957	0.771831	0.283926	0.1396	0.54465	0.630724
CETP	0.14125	0.03417	-0.00625648	0.0489434	0.263666	0.0387448	0.459976	0.154027	-0.00703144	0.00237809
MMP2	0.717455	0.728276	0.675438	0.521852	0.67747	0.588496	0.506499	0.374698	0.110377	0.831953
MT3	0.435347	0.0905319	0.0917472	0.204871	0.51696	0.314744	0.705169	0.361964	0.509238	0.387957
LPCAT2	0.696567	0.663614	0.614885	0.683134	0.626902	0.55933	0.629429	0.567212	0.538736	0.618318
GNAO1	0.495594	0.58538	0.346086	0.232019	0.752264	0.480487	0.805848	0.308521	0.143404	0.70696
OGFOD1	0.636397	0.652707	0.571319	0.498859	0.666184	0.783126	0.751182	0.782653	0.397944	0.682673
SH3BP2	0.526713	0.472207	0.553494	0.358116	0.429983	0.369822	0.496462	0.724901	0.212453	0.661466
NOP14	0.616466	0.552451	0.567304	0.537935	0.570981	0.780054	0.694316	0.487242	0.487043	0.491482
ADD1	0.52073	0.462417	0.506059	0.520193	0.575315	0.698753	0.664685	0.723708	0.313315	0.53012
L2HGDH	0.429612	0.354131	0.33437	0.511784	0.225213	0.425278	0.443824	0.625275	0.343595	0.221418
TXNDC16	0.590892	0.732448	0.477932	0.392781	0.547006	0.651375	0.738855	0.608774	0.390649	0.840291
C14orf166	0.745574	0.534472	0.681841	0.731621	0.52194	0.856372	0.815898	0.898327	0.475041	0.802039
NID2	0.75853	0.716146	0.443177	0.691744	0.851795	0.700447	0.511142	0.900951	0.802459	0.442394
GMCL1	0.507182	0.656856	0.624233	0.413968	0.474606	0.275506	0.787224	0.792272	0.196292	0.406897
SF3B2	0.284078	0.407935	0.366188	0.0818564	0.354296	0.447022	0.0735201	0.429063	0.217274	0.343798
KLHL42	0.640947	0.74796	0.646349	0.643303	0.488501	0.899936	0.424488	0.938005	0.307481	0.710171
GNAS	0.37533	0.370227	0.284238	0.489606	0.55854	0.0893981	0.648898	0.627607	0.596979	0.597373
DNM1L	0.689206	0.687864	0.696311	0.627369	0.879073	0.692107	0.484854	0.470241	0.591353	0.812215
PTHLH	0.813912	0.718331	0.893532	0.72099	0.876316	0.936015	0.781681	0.706553	0.60758	0.361631
PHACTR3	0.768034	0.718229	0.487496	0.805159	0.403214	0.799792	0.80882	0.939926	0.836572	0.659083
ERGIC2	0.602088	0.69463	0.582029	0.677463	0.664375	0.701253	0.531033	0.734257	0.231973	0.75656
TFAP2C	0.75224	0.770616	0.775597	0.698584	0.845543	0.366187	0.434595	0.966423	0.413676	0.610535
AURKA	0.497632	0.610561	0.658565	0.131739	0.679325	0.676522	0.250901	-0.00160581	0.597523	0.673586
CASS4	0.0752074	0.0942812	-0.0143794	-0.00587674	0.212672	-0.0243384	0.220044	0.0455507	0.0672422	-0.0450156
PIR	0.782543	0.652355	0.858667	0.737374	0.946734	0.759829	0.748064	0.678687	0.481723	0.910769
AAMDC	0.608473	0.674686	0.437661	0.571542	0.468639	0.814712	0.624972	0.645538	0.514752	0.61745
RFX2	0.305344	0.230217	0.313875	0.158052	0.560644	0.461419	0.00106595	0.0325197	0.330107	0.295596
SULT2B1	0.698378	0.751534	0.741567	0.496824	0.118903	0.151935	0.640734	0.779318	0.419115	0.246137
ALG6	0.628642	0.574302	0.386968	0.657725	0.503304	0.783015	0.825332	0.530661	0.644143	0.661328
CNOT3	0.366781	0.444842	0.482035	0.238843	0.265648	0.355087	0.621476	0.113518	0.165848	0.659397
GP6	0.169796	0.0568011	0.120719	0.111909	0.254011	0.0438778	0.0318449	0.807447	0.114117	0.228243
PTPN4	0.428712	0.551199	0.429462	0.251453	0.36391	0.690229	0.356634	0.72602	0.198359	0.512196
DDX18	0.518961	0.560907	0.369067	0.449763	0.360254	0.39053	0.604874	0.31485	0.622644	0.611124
KHSRP	0.392861	0.234373	0.433848	0.374666	0.574326	0.633687	0.205225	0.441384	0.175309	0.265657
GNA11	0.750088	0.460749	0.641452	0.602169	0.546621	0.6761	0.736511	0.784949	0.598172	0.835814
ASAP3	0.643691	0.511344	0.485706	0.397795	0.339215	0.392008	0.797458	0.543367	0.466917	0.623206
EDEM2	0.627732	0.540296	0.624739	0.309554	0.586241	0.695306	0.51269	0.662813	0.493097	0.741007
DNMT3B	0.62963	0.753607	0.488367	0.562949	0.601375	0.503238	0.573757	0.458381	0.381021	0.505061
REM1	0.179712	0.106871	0.111616	0.086492	0.163689	0.155265	0.565421	0.288575	0.0185856	0.34097
TPX2	0.509061	0.419408	0.394393	0.400492	0.565398	0.623507	0.509113	0.666477	0.384936	0.299797
FER1L4	0.564301	0.358521	0.299775	0.414101	0.359895	0.359747	0.381783	0.709624	0.438046	0.422731
PDRG1	0.582185	0.648293	0.694894	0.30472	0.490004	0.614888	0.637034	0.86259	0.470611	0.353493
EPB41L1	0.621758	0.467844	0.484081	0.37462	0.458897	0.631927	0.594864	0.495716	0.494834	0.406019
SLC15A1	0.444106	0.360042	0.212571	0.244551	0.39419	0.502704	0.54938	0.485796	0.431305	0.0686409
DOCK9	0.576352	0.552505	0.67179	0.332874	0.684162	0.385659	0.737596	0.634615	0.350818	0.40306
ANKRD10	0.564008	0.506223	0.573145	0.382918	0.455139	0.832511	0.34078	0.218578	0.403256	0.790885
TGDS	0.657864	0.542807	0.432168	0.614623	0.780105	0.683601	0.754636	0.47116	0.680861	0.752855
DOCK3	0.517695	0.585187	0.633537	0.369245	0.791356	0.103853	0.359793	0.00447653	0.0963339	0.645924
C3orf18	0.515381	0.569384	0.29202	0.534103	0.676844	0.463673	0.537035	0.292227	0.0960942	0.663601
COQ9	0.633782	0.712841	0.555395	0.468079	0.766768	0.731447	0.730446	0.731462	0.386603	0.675626
TMEM40	0.633099	0.627339	0.800101	0.48049	-0.0147783	0.0765383	0.604038	0.760656	0.288693	0.0429323
KIF9	0.640662	0.422622	0.507784	0.558291	0.816434	0.610913	0.251958	0.479906	0.626941	0.713565
ARHGAP28	0.736623	0.644086	0.736619	0.434458	0.431053	0.551824	0.650407	0.954875	0.11804	0.616573
CRLS1	0.679078	0.573282	0.558158	0.74607	0.604371	0.409773	0.561524	0.882959	0.719923	0.623395
DEFB127	0.0500662	0.0476746	0.0115902	0.116424	0.0579334	-0.00812917	0.248433	0.046218	0.0223179	-0.0281628
PPP1R13B	0.715844	0.62526	0.75786	0.639816	0.515214	0.618824	0.283094	0.807709	0.42577	0.623611
ATRN	0.701652	0.333225	0.716254	0.688592	0.634342	0.5802	0.561459	0.833167	0.633352	0.701519
SMOX	0.377062	0.358286	0.411492	0.172799	0.28895	0.650287	0.485223	0.475809	0.19123	0.232649
SIGLEC1	0.0971282	0.131044	-0.00317321	-0.0231003	-0.0318546	0.564099	0.189055	0.289863	0.0757579	0.138765
NSFL1C	0.580047	0.337833	0.693915	0.670192	0.714035	0.46461	0.807379	0.741202	0.608408	0.629238
SLC4A11	0.651032	0.740284	0.65375	0.565028	0.47652	0.384918	0.719623	0.216343	0.523742	0.417867
C20orf194	0.790035	0.572975	0.800532	0.668102	0.637323	0.700043	0.5397	0.905649	0.335146	0.638296
EBF4	0.198327	0.250317	0.365943	0.0420276	-0.00461068	0.386011	0.538029	0.0907927	0.199113	0.201148
CPXM1	0.77632	0.186017	0.541407	0.168213	0.837199	0.86023	0.528391	-0.0749562	0.238761	0.663934
MAVS	0.507069	0.353556	0.410076	0.629829	0.499652	0.792476	0.513526	0.223818	0.461768	0.5811
F11	0.0439139	0.17019	0.0123954	-0.0802356	0.117949	-0.02025	0.111151	0.159702	-0.0098706	-0.0946324
XRN2	0.581507	0.464397	0.508479	0.567119	0.551842	0.686829	0.556927	0.67205	0.547604	0.548121
PLK1S1	0.719874	0.586999	0.70057	0.647791	0.631806	0.760148	0.771485	0.639894	0.77248	0.810577
DYNLL1	0.422178	0.1868	0.278667	0.425967	0.38431	0.585385	0.0967067	0.0516567	0.466628	0.226957
TESC	0.801164	0.523739	0.819304	0.89284	0.458934	0.454796	0.335259	0.883951	0.78363	0.649126
SNX5	0.697086	0.577104	0.668898	0.744081	0.825056	0.69653	0.682542	0.482033	0.769394	0.708356
SIRPG	0.108982	-0.0230726	0.0136107	0.186117	-0.0300224	0.591688	0.0952391	0.105125	0.0950125	0.00203237
MAPKAPK5	0.554449	0.692516	0.299504	0.645584	0.685905	0.692501	0.537694	0.232611	0.251986	0.695171
P2RX7	0.777844	0.62205	0.406973	0.351454	0.878795	-0.0179523	0.831416	-0.048997	0.13019	0.692063
ESF1	0.448842	0.446691	0.449911	0.646858	0.461658	0.792451	0.594337	0.344289	0.175024	0.499721
RBBP9	0.483811	0.486822	0.447122	0.367597	0.375746	0.59593	0.328027	0.412324	0.41905	0.418911
ANAPC5	0.677593	0.670399	0.697837	0.675163	0.722974	0.831638	0.29701	0.419684	0.56929	0.606997
SLC23A2	0.59691	0.596335	0.376419	0.259309	0.634714	0.449151	0.50523	0.469819	0.440347	0.312779
SLC8B1	0.49235	0.477191	0.307438	0.4934	0.252297	0.546118	0.644133	0.21767	0.38966	0.38565
TMEM230	0.729574	0.696273	0.644352	0.767204	0.795452	0.591756	0.765655	0.677419	0.739491	0.746712
DZANK1	0.53876	0.503189	0.55646	0.246402	0.572225	0.457541	0.526968	0.438915	0.440982	0.308936
KDM2B	0.632285	0.775456	0.575647	0.486165	0.660814	0.563926	0.709319	0.293813	0.513794	0.707036
C20orf26	0.424701	0.0927624	0.141523	0.278518	0.680502	-0.0903214	0.187901	0.0786162	0.00178727	0.282762
LHX5	0.0448466	0.175066	-0.00482763	0.185749	0.110075	0.0203587	0.0226097	-0.0615549	0.0319164	-0.0661146
TASP1	0.488434	0.440412	0.341456	0.489242	0.527227	0.651556	0.509706	0.471542	0.363985	0.57981
OAS1	0.731576	0.700455	0.660495	0.555385	0.759871	0.835165	0.463671	0.429605	0.525644	0.733035
GCN1L1	0.437909	0.44169	0.564978	0.409778	0.469605	0.451517	0.161019	0.322738	0.351162	0.473605
PXN	0.622	0.558484	0.601836	0.381092	0.532151	0.486646	0.731998	0.540345	0.368778	0.790354
SIRT4	0.457538	0.199868	0.510092	0.259143	0.49861	0.31036	0.419614	0.5704	0.404898	0.46592
RPH3A	0.412057	0.356938	0.122802	0.120474	0.829853	0.167237	0.091896	0.0162239	0.0403055	0.137043
KIF16B	0.655197	0.69189	0.557117	0.605851	0.712827	0.643878	0.188507	0.637044	0.69727	0.488877
TRMT6	0.700143	0.517501	0.60488	0.738713	0.776455	0.845432	0.801204	0.793929	0.476951	0.718115
CHGB	0.73527	0.220328	0.777857	0.739837	0.792672	0.778684	0.419946	-0.0916254	0.746207	0.205924
PEBP1	0.40395	0.756707	0.193489	0.590772	0.658202	0.848274	0.675148	0.832932	0.507195	0.704954
TBX5	0.484478	0.635077	0.348645	0.0545349	0.0607295	0.50546	0.845033	0.456478	0.0846694	0.569903
BRAP	0.510453	0.469713	0.300692	0.643481	0.559383	0.617258	0.573423	0.51653	0.383927	0.708323
ERP29	0.555506	0.466938	0.711459	0.721095	0.739159	0.123559	0.633523	0.42504	0.422207	0.301414
NOS1	0.562171	0.392254	0.67551	0.0138741	0.603998	0.276998	0.122818	0.657747	-0.00494434	0.686849
FUS	0.214943	0.0932487	0.088625	0.148442	0.0253953	0.637091	0.059201	0.00437416	0.265431	0.27418
IGBP1	0.64255	0.567293	0.652876	0.30401	0.468206	0.601787	0.43856	0.199382	0.765999	0.69957
FXYD5	0.785249	0.785878	0.747576	0.673096	0.845704	0.691179	0.559861	0.967104	0.571147	0.816526
ZNF302	0.466491	0.475572	0.267082	0.340778	0.410167	0.743149	0.756199	0.786643	0.281018	0.711494
GRAMD1A	0.529947	0.627736	0.485416	0.453983	0.426985	0.379085	0.398636	0.353837	0.561761	0.529115
FXYD3	0.860062	0.490245	0.897492	0.0417711	0.761836	0.367304	0.764865	0.814483	0.864707	0.53423
HEPH	0.827969	0.787846	0.481513	0.73397	0.627889	0.701401	-0.0284018	0.972142	0.910344	0.772688
CDIP1	0.727405	0.727119	0.637088	0.664081	0.609843	0.617895	0.729369	0.657237	0.530151	0.680082
KCNH4	0.0717108	-0.0299504	0.0463606	0.0709121	0.0283374	-0.00579021	0.0219936	0.0726135	-0.011175	0.273121
GANAB	0.418523	0.363998	0.314115	0.345408	0.34028	0.382736	0.364777	0.342095	0.326618	0.692578
GMIP	0.469519	0.410384	0.355889	0.147789	0.338508	0.444793	0.295868	0.522481	0.260728	0.158019
RBM41	0.428934	0.460594	0.172329	0.541447	0.60735	0.622625	0.774699	0.406637	0.204664	0.717786
BIRC5	0.509129	0.615563	0.41364	0.305331	0.311548	0.406581	0.425882	0.781929	0.309875	0.553602
LAG3	0.312474	0.0187704	0.565181	-0.0714423	0.0612448	0.386352	0.533019	0.145931	0.344787	0.464127
MLF2	0.567749	0.457118	0.364441	0.518622	0.683919	0.643625	0.738589	0.900506	0.411229	0.535377
OTUB2	0.470314	0.14562	0.477319	0.372495	0.374812	0.455672	0.349912	0.656741	0.457489	0.244623
DDX24	0.518273	0.213696	0.4643	0.469233	0.59785	0.823251	0.516547	0.753942	0.454108	0.355083
ZBTB25	0.508107	0.501884	0.604856	0.476147	0.602664	0.444223	0.493516	0.307241	0.439579	0.487581
NECAP1	0.637263	0.733603	0.352364	0.590665	0.744235	0.717254	0.700454	0.571775	0.622015	0.722579
ANKRD24	0.0273531	0.020387	0.0203861	0.0818194	0.0595916	0.0502507	-0.00707841	0.0973559	0.0177125	-0.0194908
DHX32	0.694685	0.658083	0.738545	0.542443	0.646422	0.812874	0.525681	0.733882	0.596226	0.469379
RCOR1	0.566481	0.491292	0.612826	0.551352	0.363437	0.713205	0.381884	0.343019	0.472992	0.570665
GPATCH2L	0.450353	0.520005	0.25051	0.418278	0.256683	0.624642	0.530028	0.877138	0.201847	0.62866
LTBP4	0.432786	0.223944	0.267705	0.418749	0.0959513	0.732862	0.712801	0.426321	0.124034	0.792979
BLVRB	0.705522	0.766483	0.79879	0.238188	0.65182	0.887188	0.868402	0.186149	0.419209	0.353289
SLC9A1	0.434017	0.335072	0.324195	0.388684	0.452537	0.231227	0.543398	0.655746	0.354747	0.479511
SPTLC1	0.393586	0.347914	0.340085	0.383765	0.459523	0.63164	0.451176	0.801142	0.280745	0.323554
PAPOLA	0.485368	0.338138	0.531658	0.311172	0.643467	0.756322	0.384304	0.269203	0.50074	0.636561
CCNK	0.634206	0.446738	0.662476	0.583983	0.633076	0.732506	0.49373	0.572543	0.621922	0.642279
PCBP4	0.540083	0.667106	0.352764	0.535835	0.448111	0.731588	0.605727	0.789808	0.376115	0.270004
RGS1	0.542742	0.157881	0.297174	-0.0109132	0.613026	0.975604	0.996254	0.172197	0.797493	0.921403
YPEL3	0.429981	0.321821	0.308511	0.294187	0.302874	0.58436	0.529812	0.710927	0.407495	0.305077
MRPS33	0.463485	0.34007	0.483159	0.446649	0.573557	0.422302	0.337916	0.768609	0.317583	0.50369
NDUFB2	0.572498	0.567778	0.344275	0.640127	0.658733	0.754738	0.516721	0.552678	0.555793	0.841292
NUDC	0.6206	0.306904	0.684602	0.640113	0.873261	0.69198	0.701305	0.742411	0.411839	0.83154
MAEA	0.555565	0.364621	0.729681	0.478724	0.605452	0.680862	0.563331	0.668723	0.430945	0.483578
ICAM1	0.64799	0.451002	0.600373	0.415565	0.549496	0.706794	0.750018	0.828366	0.47856	0.639447
STRN4	0.407084	0.417557	0.322007	0.293557	0.655382	0.407284	0.64403	0.408399	0.278306	0.662851
IRAK3	0.703678	0.637985	0.661258	0.807942	0.595047	0.502123	0.438597	0.554707	0.679579	0.810386
LYZ	0.750308	0.333752	0.521161	0.894733	0.514346	0.68367	-0.0773528	0.903316	0.587134	0.494722
SI	0.708708	0.642054	-0.0411443	0.697302	0.535132	0.680123	-0.0950049	0.938782	0.728725	0.943972
MUL1	0.463347	0.570119	0.492881	0.314856	0.573862	0.711499	0.677301	0.431872	0.201045	0.610658
TFAP4	0.165292	0.189841	0.230481	0.0297448	0.126458	0.297275	0.214254	-0.100842	0.137516	0.139029
PDCD7	0.442039	0.382438	0.306168	0.342713	0.408034	0.535957	0.341236	0.42029	0.371281	0.481606
SPG21	0.427507	0.490343	0.355722	0.523789	0.45898	0.58107	0.400006	0.299613	0.300682	0.712429
FETUB	0.379923	0.0535251	0.478109	0.226355	0.413762	0.105985	-0.0470704	0.167802	0.194438	0.00500822
DNAJB11	0.586884	0.501927	0.722373	0.363875	0.563532	0.553885	0.837675	0.830582	0.562208	0.43294
LEPREL1	0.643839	0.513776	0.581329	0.620133	0.692481	0.653548	0.797802	0.833622	0.572534	0.49255
THPO	0.497184	0.0363238	0.715795	0.163156	0.700442	0.447385	0.692307	0.0608503	0.0340639	0.233966
RAB11FIP3	0.466782	0.427839	0.364106	0.21493	0.534216	0.371732	0.612475	0.118041	0.367149	0.526135
GNPTG	0.588055	0.520818	0.490892	0.613005	0.793695	0.720018	0.899343	0.387199	0.383354	0.212395
ZNF268	0.677045	0.609184	0.514764	0.697038	0.751315	0.681537	0.671295	0.55387	0.474135	0.760791
GOLGA3	0.405102	0.429397	0.549777	0.389696	0.306368	0.28629	0.307431	0.406831	0.274027	0.624866
PABPC4	0.60846	0.431057	0.633436	0.580176	0.39772	0.58209	0.308922	0.720057	0.524792	0.819581
CD209	0.0817505	0.153956	0.0296853	0.0297856	0.0206935	0.231019	0.19758	0.180833	0.0125681	0.212249
CERS4	0.630888	0.690212	0.537416	0.217902	0.603942	0.411096	0.549352	0.806246	0.377012	0.720159
MCOLN1	0.362516	0.305838	0.201361	0.250854	0.442836	0.505111	0.407515	0.313936	0.250581	0.322538
USP48	0.535393	0.244965	0.494374	0.481053	0.635966	0.645976	0.814154	0.489572	0.301303	0.686472
EFNB1	0.518048	0.183957	0.609581	0.208607	0.0924837	0.414781	0.664929	0.597401	0.28356	0.45127
PDPR	0.612262	0.562476	0.545513	0.626423	0.803311	0.802754	0.738084	0.212926	0.445494	0.61504
AARS	0.53757	0.582937	0.65747	0.512003	0.84078	0.695482	0.626575	0.510029	0.148738	0.639506
GLG1	0.580984	0.515155	0.553794	0.49478	0.74797	0.596021	0.637377	0.41308	0.381784	0.545259
KIF4A	0.423351	0.341711	0.57284	0.221006	0.478111	0.640918	0.276173	0.434294	0.342042	0.480382
TNRC6A	0.42627	0.443808	0.494192	0.42846	0.266555	0.631641	0.311121	-0.0354423	0.157675	0.708253
PLEKHG2	0.468968	0.497592	0.475665	0.274966	0.307301	0.805047	0.321577	0.368176	0.348924	0.472198
DLL3	0.461693	0.216898	0.620757	0.102459	0.430989	0.303098	0.333282	0.586672	0.195578	0.226361
NAT14	0.656833	0.669038	0.528836	0.460211	0.830682	0.711868	0.580725	0.628794	0.333092	0.62925
PITPNM2	0.346419	0.451806	0.381907	0.269546	0.155929	0.358982	0.395545	0.0115999	0.140221	0.297728
EXOC1	0.665446	0.488185	0.6026	0.646326	0.471239	0.820103	0.637523	0.840134	0.537453	0.715065
POU4F3	0.135865	-0.0259023	0.0432855	0.116035	0.019111	0.173492	0.0804001	0.0815531	0.0694297	-0.0296586
OSBPL8	0.588533	0.559748	0.527868	0.654806	0.613334	0.856234	0.407455	0.727205	0.302392	0.755462
DTX2	0.483976	0.214245	0.2824	0.43963	0.281381	0.42896	0.576233	0.674967	0.410066	0.217979
NLRC4	0.0926488	0.154789	0.114985	0.0737513	0.150038	-0.0341705	0.101775	-0.0384888	0.0138661	0.0763488
PUS7	0.68955	0.63624	0.579606	0.61547	0.65461	0.691651	0.554396	0.845164	0.486833	0.800257
LAMB4	0.0123133	-0.02728	0.123589	0.155281	-0.00497851	0.164132	-0.0347312	-0.0569847	0.0425645	0.0680664
NRCAM	0.728141	0.611969	0.771389	0.346239	0.776888	0.45727	0.768992	0.600759	0.66188	0.633685
LAMB1	0.730988	0.740399	0.829166	0.537972	0.529397	0.805119	0.949639	0.438925	0.461862	0.797303
SLC26A4	0.726758	0.290599	0.388852	0.48355	0.799063	0.206794	0.641113	0.631457	0.0347197	0.621304
SLC26A3	0.743172	0.331649	0.0264153	0.30645	0.969749	0.939449	-0.0298674	0.977355	0.601178	-0.0440906
DLD	0.522899	0.424122	0.527395	0.519026	0.748468	0.333756	0.62601	0.555079	0.516266	0.569349
WDR7	0.509123	0.55594	0.416816	0.197932	0.253103	0.478812	0.251181	0.339157	0.442342	0.303908
TXNL1	0.577989	0.497552	0.595871	0.50627	0.608435	0.618231	0.285451	0.065393	0.403197	0.596086
IL5RA	0.193431	0.019022	0.0584725	0.0161722	0.0121264	0.491258	0.376671	0.265888	0.016971	0.121021
ABCC6	0.691643	0.2689	0.611534	0.410632	0.673625	0.431361	0.831977	0.769799	0.548213	0.553577
CMTM6	0.655292	0.420911	0.567036	0.645487	0.76639	0.681812	0.811185	0.871581	0.738847	0.401765
ITGA6	0.777661	0.621936	0.816937	0.631841	0.664181	0.526968	0.361614	0.658554	0.928198	0.700608
RAPGEF4	0.594154	0.710215	0.35975	0.350554	0.546263	0.688698	0.491996	0.651811	0.417091	0.526686
SMPX	0.569588	0.452724	0.361191	0.154035	0.523065	0.26166	0.196337	0.187112	0.607859	0.916052
FH	0.398667	0.548832	0.358691	0.183078	0.64472	0.75624	0.347747	0.198811	0.148466	0.622428
SEL1L3	0.754726	0.723996	0.590758	0.741075	0.495446	0.629974	0.365732	0.648995	0.391481	0.449671
TF	0.716835	0.679018	0.751924	0.650097	0.908359	0.5321	0.548943	0.651647	0.183609	0.475938
CDV3	0.434552	0.379263	0.457652	0.297919	0.387282	0.559847	0.451106	0.799806	0.214535	0.641791
MYO15A	0.176624	0.0607332	-0.0352	-0.0434801	0.0538659	0.242091	0.102089	-0.168637	0.017646	0.451089
ALKBH5	0.524766	0.313714	0.501014	0.443141	0.382923	0.534468	0.443819	0.148842	0.341191	0.663696
APOH	0.641666	0.0561878	0.819378	0.0969436	0.834045	0.652642	0.547701	0.50513	0.333543	0.032792
NLRP1	0.465551	0.459425	0.577322	0.368541	0.418454	0.426991	0.308098	0.333939	0.453571	0.408674
PITPNM3	0.5448	0.426873	0.654132	0.370504	0.0163077	0.679861	0.318558	0.501146	0.400136	0.369955
SPAG7	0.519923	0.477869	0.562611	0.57627	0.472578	0.602407	0.611783	0.455174	0.316452	0.536012
ORC6	0.385275	0.19405	0.737007	0.224902	0.417848	0.449502	0.2381	0.506332	0.165801	0.243309
ZFHX4	0.745117	0.621342	0.535892	0.416256	0.494813	0.745869	0.711911	0.938983	0.0324579	0.900164
SLC17A6	0.43987	0.0938688	0.0179516	0.176313	0.858823	-0.00604165	-0.00271158	-0.0330393	0.0465088	0.842619
CPA1	0.168944	0.0864196	0.000953759	0.1663	0.0967201	0.492935	0.111857	0.420139	0.0397808	0.766173
ZC3HC1	0.666279	0.615371	0.528186	0.450756	0.556813	0.449181	0.937082	0.223191	0.397507	0.802029
ESR1	0.490104	0.592813	0.298999	0.208895	0.210245	0.45149	0.112448	0.198321	0.139513	0.429446
RGS17	0.735816	0.599141	0.626222	0.638826	0.929306	0.630511	0.557324	0.871791	0.346855	0.838388
ANGPT2	0.701756	-0.0494769	0.586384	0.39064	0.745634	0.969983	0.911443	0.606484	0.0418119	0.61906
TMEM101	0.702256	0.651679	0.506808	0.404941	0.441343	0.698076	0.718502	0.624634	0.629711	0.763916
CD200	0.713108	0.653008	0.77912	0.234659	0.806658	0.853623	0.765668	0.584994	0.653656	0.306888
CCDC80	0.774301	0.919245	0.481127	0.614872	0.465058	0.421058	0.715911	0.245593	0.21068	0.724813
CMA1	0.0518992	0.0860022	0.0401548	0.0932249	-0.0681441	0.157316	0.0140349	0.208405	0.0130366	0.0207464
PSME1	0.632466	0.613053	0.642692	0.619364	0.321308	0.962735	0.626421	0.39538	0.382718	0.476666
PPP2R3C	0.669102	0.546591	0.698148	0.517647	0.616175	0.649676	0.762574	0.933096	0.308853	0.729456
JPH4	0.387463	0.0179163	-0.0182916	0.0644046	0.323724	0.565319	0.148176	-0.0175667	0.0917092	0.684851
MYH7	0.115413	0.0650352	0.0531	0.0252309	0.138384	0.553888	0.0343486	-0.0421638	0.00214888	0.454402
CEBPE	0.0796549	-0.0377661	0.0282156	0.070053	0.0694422	0.159248	0.27729	-0.0869521	0.053881	0.0122909
SLC7A8	0.658901	0.644455	0.792456	0.48286	0.625642	0.751943	0.386659	0.875705	0.432568	0.699442
OSGEP	0.500273	0.45681	0.553101	0.601191	0.432596	0.310918	0.497779	0.847161	0.442605	0.348086
SLC22A17	0.67508	0.792462	0.489988	0.127544	0.80806	0.612849	0.686119	0.656033	0.00163441	0.710311
SCFD1	0.496892	0.613682	0.652896	0.433911	0.51647	0.670555	0.295792	0.818377	0.248275	0.615715
G2E3	0.533298	0.603681	0.480941	0.552924	0.590935	0.645068	0.644804	0.762471	0.231792	0.697293
HECTD1	0.425016	0.343703	0.508817	0.230031	0.476684	0.416382	0.36903	0.655903	0.362872	0.568627
HNRNPC	0.431744	0.3862	0.407118	0.42281	0.61218	0.666672	0.515746	0.36781	0.2965	0.647486
RPGRIP1	0.122367	0.475153	0.0793947	0.0365361	0.134597	0.157236	0.137372	0.171315	-0.0178639	0.20704
SUPT16H	0.240931	0.37615	0.211957	0.15908	0.244086	0.172807	0.178806	0.524901	0.248455	0.319569
TOX4	0.577291	0.552236	0.655894	0.384826	0.446759	0.518542	0.498798	0.585544	0.698981	0.522511
GEMIN2	0.516697	0.383147	0.4144	0.43227	0.385383	0.720836	0.625645	0.757018	0.377352	0.684789
TGM1	0.586354	0.606986	0.783204	0.176192	0.183797	0.282777	0.276272	0.690114	0.102795	0.0745854
TINF2	0.55725	0.53459	0.583309	0.535009	0.61889	0.762849	0.687249	0.547555	0.430359	0.566749
DAZL	0.549685	0.458963	0.17912	0.141728	0.803737	0.101356	0.508203	-0.015698	0.010685	0.734152
TBL1Y	0.261608	0.202372	0.526874	0.0301337	0.141345	0.112167	0.27378	0.0800246	0.182763	0.123098
SEMA6A	0.708729	0.623098	0.701499	0.599178	0.605608	0.420778	0.532516	0.859431	0.48867	0.902543
TRPM7	0.366099	0.362015	0.216971	0.369427	0.488605	0.494211	0.342734	0.443575	0.146732	0.617364
TYRO3	0.55574	0.466838	0.523805	0.452898	0.78424	0.328344	0.485824	0.383885	0.375069	0.592002
WDR76	0.558385	0.440633	0.507123	0.401328	0.263071	0.831435	0.621571	0.890145	0.414806	0.673723
SNAP23	0.452877	0.414136	0.386202	0.274965	0.581187	0.807701	0.206646	0.179433	0.132179	0.675246
TBX15	0.706558	0.362052	0.603985	0.632794	0.369331	0.702423	0.822415	0.262684	0.439821	0.597653
PHGDH	0.728224	0.78593	0.799781	0.594334	0.581034	0.57686	0.888272	0.853731	0.528524	0.641196
COL9A3	0.738943	0.771179	0.592189	0.553094	0.88276	0.676213	0.33878	0.650581	0.737179	0.909257
EZR	0.787205	0.604433	0.634327	0.285157	0.590073	0.909726	0.678371	0.589595	0.617131	0.759604
MYL6	0.417722	0.251208	0.360651	0.266791	0.280846	0.263209	0.411454	0.542443	0.321349	0.477915
AGO1	0.449281	0.384869	0.557598	0.195279	0.387577	0.705736	0.598088	0.164356	0.213544	0.460023
TEKT2	0.31109	0.248277	0.100723	0.252932	0.0513979	0.766586	0.214659	-0.147493	0.0836431	0.159608
CLSPN	0.286065	-0.014268	0.22299	-0.028178	0.262794	0.390684	0.45695	0.0616988	0.120476	0.443594
RFFL	0.533252	0.369454	0.57384	0.436667	0.368227	0.394905	0.393519	0.130201	0.294908	0.58017
UNC13D	0.399623	0.303491	0.435721	0.225427	0.342637	0.362228	0.41596	0.532494	0.386895	0.12876
MFSD11	0.623068	0.791325	0.710663	0.621162	0.646921	0.717026	0.65262	0.128824	0.330272	0.730479
DPYSL2	0.653454	0.462918	0.634325	0.541928	0.723691	0.728306	0.955791	0.927109	0.366726	0.758219
TGFB2	0.694135	0.725359	0.643634	0.643261	0.369275	0.767775	0.459156	0.879262	0.349837	0.772819
GPATCH2	0.339284	0.34599	0.308028	0.390642	0.166576	0.331332	0.66259	0.769027	0.0959988	0.3961
NUP50	0.55991	0.644532	0.561365	0.488609	0.420381	0.426238	0.457741	0.754531	0.319995	0.673105
CDC45	0.528627	0.489091	0.359196	0.559437	0.375983	0.560627	0.385421	0.699341	0.15553	0.477197
COMT	0.610808	0.475052	0.464558	0.572783	0.799441	0.545253	0.6711	0.851744	0.261158	0.581133
CECR1	0.626299	0.691151	0.563038	0.128904	0.723319	0.658746	0.456676	0.551736	0.552167	0.735566
VNN3	0.175698	0.176247	0.390163	-0.00557858	0.407044	-0.023656	0.354773	-0.0617257	0.118217	-0.038138
ECHDC1	0.752725	0.738025	0.959889	0.52141	0.586691	0.532775	0.554229	0.68488	0.494937	0.79232
LRRFIP2	0.623006	0.589089	0.481707	0.462399	0.406489	0.658628	0.654126	0.818552	0.511421	0.750243
SEC22C	0.642452	0.633157	0.528685	0.546419	0.76437	0.507582	0.721244	0.371065	0.404666	0.57493
XYLB	0.390563	0.429174	0.0947864	0.163108	0.349102	0.44079	0.515408	0.396939	0.259262	0.316482
HDAC6	0.393115	0.550528	0.251247	0.362755	0.679944	0.489669	0.437323	0.674999	0.137359	0.555792
OR1I1	0.116845	0.132164	0.0438123	0.0157944	0.315034	0.198928	0.291903	-0.0567419	0.172942	0.101037
GABRP	0.789013	0.919044	0.702622	0.778012	0.669754	0.614403	0.00303432	0.725324	0.395737	0.177618
CDC6	0.381158	0.395929	0.401751	0.293621	0.246502	0.731205	0.24628	0.675003	0.326979	0.580475
UPRT	0.586021	0.612981	0.614385	0.401127	0.751817	0.738577	0.440347	0.315354	0.527807	0.564717
CDC23	0.444693	0.461488	0.364248	0.477472	0.702514	0.681349	0.39794	0.382642	0.156813	0.761952
AAAS	0.469258	0.43475	0.43763	0.353448	0.727622	0.694596	0.874031	0.496783	0.268391	0.540492
CBX5	0.515473	0.405694	0.486213	0.356788	0.468756	0.580826	0.187764	0.839108	0.342497	0.461973
FMO2	0.705639	0.82255	0.757416	0.0136611	0.348879	0.279813	0.463585	0.591309	0.177887	0.892255
SUCO	0.577606	0.648509	0.484667	0.645405	0.525487	0.48157	0.713182	0.811397	0.347685	0.874872
MSH2	0.619924	0.465719	0.620779	0.116122	0.668183	0.795836	0.296003	0.664463	0.545383	0.902118
MAP3K1	0.552897	0.691703	0.415509	0.452843	0.52249	0.571938	0.412006	0.529163	0.231343	0.589297
DHPS	0.527167	0.750666	0.401752	0.479673	0.72265	0.629635	0.796664	0.889762	0.333078	0.530872
HOOK2	0.59118	0.188863	0.467007	0.337933	0.21362	0.670782	0.544273	0.457236	0.211562	0.442212
NXPE1	0.548744	0.19898	0.0594261	0.0815676	0.0643545	0.138815	0.207191	0.675447	0.4142	0.274948
ARCN1	0.523325	0.411827	0.503256	0.445417	0.546694	0.365479	0.789736	0.933676	0.349579	0.495748
EPB41L4B	0.764995	0.744381	0.758063	0.676211	0.384289	0.297102	0.256997	0.673427	0.562026	0.802602
TMEM38B	0.574749	0.463635	0.379794	0.403331	0.794037	0.749054	0.61889	0.891227	0.59536	0.794931
PSMD5	0.621769	0.662063	0.54085	0.708578	0.643438	0.476602	0.861284	0.428702	0.5178	0.435746
PTGS1	0.700314	0.439926	0.762912	0.727237	0.328491	0.893685	0.473864	0.926366	0.551152	0.636899
NUP188	0.252919	0.344855	0.246942	0.177924	0.106863	0.423405	0.0944001	0.00348981	0.167904	0.282698
CRAT	0.542646	0.717644	0.621912	0.195741	0.520081	0.612287	0.596077	0.373286	0.418004	0.456097
SH2D3C	0.418152	0.314124	0.473607	-0.0340993	0.332808	0.335063	0.538155	-0.127408	0.100621	0.274946
NANS	0.748316	0.6079	0.606402	0.533402	0.840652	0.624094	0.761443	0.543677	0.59532	0.859445
TBC1D2	0.490983	0.19467	0.504198	0.353464	0.349644	0.472349	0.586859	0.861688	0.320237	0.333242
DFNB31	0.509336	0.634813	0.254243	0.42759	0.61453	0.585942	0.302685	0.579708	0.41924	0.391023
PDE6C	0.00915725	-0.0771062	-0.0304294	-0.0131217	-0.0844629	0.63716	-0.0712866	0.23304	-0.06683	0.000744912
CWF19L1	0.60795	0.477551	0.531022	0.682842	0.610112	0.761853	0.515179	0.746013	0.50457	0.500605
SEMA4G	0.663665	0.249619	0.671069	0.471646	0.531351	0.471366	0.549638	0.756347	0.312221	0.327891
BTAF1	0.410629	0.492184	0.33743	0.463558	0.333257	0.707441	0.536621	0.182144	0.266699	0.420788
IKZF5	0.341913	0.332727	0.251969	0.428186	0.459386	0.575492	0.367528	0.322532	0.214147	0.38719
BLNK	0.709177	0.561265	0.520209	0.793243	0.708247	0.436627	0.750893	0.951245	0.546422	0.743792
TLL2	0.516974	0.731991	0.422984	0.613404	0.372319	0.432858	0.0396478	0.204917	0.449472	0.652932
CYP26A1	0.551014	0.288197	0.721492	0.259529	0.39341	0.172418	0.2026	0.79859	0.149805	0.786006
TDRD1	0.738649	0.757519	0.862515	0.797616	-0.0180646	0.0145436	0.0103606	0.177122	0.898498	0.0373971
SORBS1	0.672085	0.37072	0.647868	0.524155	0.577466	0.279927	0.78555	0.880201	0.659273	0.783218
CRTAC1	0.572498	0.47048	0.733503	0.180451	0.737638	0.324851	0.462877	-0.107841	0.00687309	0.687786
BAMBI	0.735906	0.834877	0.840982	0.778902	0.383169	0.591565	0.606583	0.266501	0.565673	0.610207
IL11	0.491059	0.333698	0.549346	0.277406	0.298051	0.243587	0.647176	0.275497	0.0753197	0.781595
MYO3A	0.463085	0.304319	0.433386	0.379395	0.627645	0.27098	0.547883	0.463775	0.167973	0.804256
WAC	0.636362	0.787594	0.586683	0.491716	0.690875	0.530288	0.555918	0.907255	0.343297	0.707386
CREM	0.647238	0.565538	0.351019	0.707313	0.711695	0.4331	0.572416	0.893912	0.295639	0.760962
NUBP2	0.463646	0.429188	0.513738	0.249495	0.576067	0.467385	0.707301	0.468312	0.400392	0.434725
TPSD1	0.0727164	0.0184088	0.0514048	0.0351938	0.202516	0.176955	0.0161826	-0.0862907	-0.0116613	0.0957267
C19orf77	0.760691	0.126494	0.449818	0.710849	0.182336	0.544359	0.725123	0.881452	0.564527	0.270428
HIVEP1	0.461918	0.395056	0.334907	0.415328	0.388166	0.542405	0.598489	0.375372	0.264063	0.573857
TREM2	0.204997	0.163163	0.384082	0.0493544	-0.0546506	0.353894	0.169495	-0.12373	0.0817511	0.0623584
KCNK16	0.0955016	0.123422	0.074936	0.101156	0.10694	0.203207	0.320488	0.0747846	-0.0195122	0.121852
CRISP3	0.438472	0.586251	0.101093	0.691793	0.296662	0.453027	-0.0999272	0.881773	0.435858	-0.08404
FKBP5	0.68272	0.602817	0.652967	0.480034	0.782248	0.898003	0.548106	0.825186	0.453093	0.49329
SRPK1	0.582527	0.584109	0.447176	0.420433	0.551809	0.380772	0.485764	0.770875	0.299442	0.518341
BRPF3	0.35046	0.332326	0.25116	0.275356	0.708469	0.60087	0.159337	0.341756	0.321383	0.374986
MRPS18A	0.678832	0.80242	0.607781	0.784008	0.478607	0.681248	0.614951	0.869613	0.303513	0.828746
PGC	0.545633	0.132403	0.435012	0.76824	0.125619	0.263972	0.0709922	0.358625	0.439785	0.165455
TMEM14A	0.702162	0.698066	0.936076	0.595085	0.564099	0.253141	0.699593	0.264902	0.215363	0.56814
EFHC1	0.511731	0.35068	0.648706	0.495707	0.312906	0.616129	0.306063	0.604456	0.352485	0.354138
NCR2	0.273386	0.218169	0.0715871	0.198967	0.279456	0.292251	0.268256	0.198544	0.142226	0.248129
HSP90AB1	0.528753	0.527277	0.407093	0.460038	0.466583	0.72671	0.666675	0.641157	0.318517	0.649579
MLN	0.0894574	0.0627494	0.0123082	0.252536	-0.0274491	0.127484	0.107657	-0.158648	0.0337618	0.204369
CDC5L	0.569559	0.676249	0.620969	0.491447	0.577782	0.763578	0.56348	0.742101	0.232053	0.751948
ITPR3	0.610652	0.286294	0.610353	0.357743	0.532909	0.569525	0.509088	0.557692	0.121317	0.667467
ZNF184	0.449694	0.577292	0.235088	0.625227	0.755089	0.746914	0.425714	0.775083	0.146202	0.55222
DSP	0.838999	0.0693452	0.996576	0.66757	0.606183	0.258115	0.349723	0.948304	0.997169	0.666617
SIRT1	0.469228	0.499331	0.391123	0.561388	0.6179	0.435462	0.402042	0.411466	0.3249	0.743649
HNRNPH3	0.433528	0.284029	0.486377	0.358961	0.461208	0.446818	0.306452	0.292361	0.203867	0.618722
IFT74	0.608079	0.443727	0.445952	0.640728	0.322916	0.558426	0.434908	0.415549	0.39041	0.800404
JAK2	0.598494	0.568803	0.590777	0.66536	0.516653	0.466992	0.660743	0.552204	0.545812	0.481077
IL12RB1	0.32854	0.193933	0.398774	0.299928	0.317369	0.460551	0.399733	0.667204	0.156183	0.297164
ABL1	0.503472	0.322654	0.503716	0.303957	0.209532	0.554142	0.768902	0.130771	0.358592	0.651922
ACOT7	0.675318	0.751026	0.674058	0.629075	0.80617	0.544846	0.522197	0.524973	0.572783	0.742434
SH3GLB1	0.645495	0.598114	0.637608	0.582024	0.503696	0.775489	0.541417	0.215276	0.561923	0.481259
CDC7	0.524558	0.571485	0.508605	0.306567	0.776063	0.824667	0.709385	0.26793	0.344969	0.518538
SYDE2	0.256046	0.21688	0.187013	0.117686	0.274536	0.120395	0.421716	-0.117022	0.294535	0.264723
PCSK5	0.705726	0.474419	0.530207	0.599068	0.737095	0.742356	0.669028	0.790797	0.523663	0.62295
SCD	0.579031	0.58315	0.582625	0.508962	0.62694	0.628319	0.604651	0.936573	0.28904	0.376546
TMED1	0.457379	0.505876	0.221904	0.627478	0.411475	0.782153	0.53638	0.191608	0.131266	0.496621
ABLIM1	0.821069	0.560098	0.752188	0.666507	0.506613	0.67243	0.942886	0.394819	0.690151	0.808658
ERMP1	0.749732	0.773721	0.609296	0.642601	0.720045	0.645934	0.509765	0.841736	0.580422	0.562641
RAB18	0.592056	0.681772	0.745234	0.542019	0.678736	0.555687	0.565586	0.68399	0.220153	0.582455
NRP1	0.714733	0.696551	0.640059	0.545583	0.772871	0.571214	0.662124	0.818218	0.643277	0.606338
PRTFDC1	0.860058	0.893287	0.751641	0.648398	0.826203	0.749561	0.847345	0.837018	0.597477	0.864686
PALMD	0.678133	0.690803	0.678412	0.690831	0.792541	0.319003	0.174809	0.773035	0.721625	0.86886
TSPAN15	0.723409	0.475158	0.65788	0.579529	0.459631	0.555755	0.519747	0.783179	0.506852	0.529455
H2AFY2	0.553242	0.652873	0.526421	0.544958	0.35095	0.791672	0.399004	0.849255	0.290934	0.683066
FAM21A	0.400952	0.455047	0.427749	0.620204	0.260799	0.510326	0.686199	0.527708	0.23016	0.200951
MAST3	0.437671	0.409174	0.264845	0.353996	0.43783	0.328218	0.609844	0.401186	0.197622	0.387222
MZF1	0.430704	0.334035	0.331128	0.359092	0.394805	0.630758	0.637437	0.195885	0.383297	0.67362
OCEL1	0.645866	0.658942	0.471399	0.603647	0.601676	0.834157	0.670429	0.620659	0.39253	0.549804
MYO9B	0.491934	0.477337	0.44173	0.358229	0.656152	0.56781	0.432241	0.405061	0.206346	0.835993
KCNK6	0.75411	0.580845	0.698788	0.566952	0.264831	0.338081	0.626453	0.294027	0.715935	0.711675
CATSPERG	0.211612	0.393592	0.0707758	0.241939	0.064886	0.355283	0.372729	0.64771	0.0995565	0.130332
PSMD8	0.484492	0.515339	0.468695	0.537399	0.796463	0.563966	0.620252	0.595058	0.214461	0.403725
FBXL19	0.344514	0.376194	0.241409	0.228249	0.0620947	0.395321	0.365882	0.0657575	0.205905	0.338555
STX1B	0.107036	0.0143958	0.0574364	0.0618762	0.0913962	0.237192	-0.00156386	-0.00904747	0.0253477	0.156104
[truncated: 15,305 more rows]
